# Supplementary material
Source: publisher site journal article supplement (https://www.spandidos-publications.com/4620/downloadSupplementary)
Supplement: Supplementary file 1 [file downloadSupplementary]

## Sheet: GFP-VS-B9.mRNA.GeneDiffExpFilte
Table SI. BMP9-induced osteogenesis in MEFs.
GeneID	Means-GFP	Means-B9	log2FC(B9/GFP)	Up-Down-Regulation(B9/GFP)	FDR	transcript_id(s)	Symbol	Gene-Biotype	Description	protein_id(s)	NR-ID	NR-Annot	SwissProt-ID	SwissProt-Annot	COG-ID	Protein-or-Domain	Functional-Categories	Function-Description	KEGG-ID	KEGG-Annot	GO-BP	GO-CC	GO-MF	PFAM-DOMAIN	InterPro-Domain
ENSMUSG00000028843	562	148	-1.87968	Down	0.00526856	ENSMUST00000030651;ENSMUST00000105879;ENSMUST00000136408	Sh3bgrl3	protein_coding	SH3 domain binding glutamic acid-rich protein-like 3 [Source:MGI Symbol;Acc:MGI:1920973]	ENSMUSP00000030651,ENSMUSP00000101505	gi|159162524|pdb|1J0F|A	Chain A, Solution Structure Of The Sh3 Domain Binding Glutamic Acid- Rich Protein Like 3	sp|Q91VW3|SH3L3_MOUSE	SH3 domain-binding glutamic acid-rich-like protein 3 OS=Mus musculus GN=Sh3bgrl3 PE=1 SV=1	--	--	--	--	xma:102221819	deleted in malignant brain tumors 1 protein-like; K13912 deleted in malignant brain tumors 1 protein	GO:0055114 oxidation-reduction process | GO:0045454 cell redox homeostasis | GO:0043547 positive regulation of GTPase activity | GO:0043535 regulation of blood vessel endothelial cell migration | GO:0030834 regulation of actin filament depolymerization	GO:0009055 electron carrier activity | GO:0030215 semaphorin receptor binding | GO:0005096 GTPase activator activity | GO:0015035 protein disulfide oxidoreductase activity	GO:0070062 extracellular exosome | GO:0030027 lamellipodium | GO:0005737 cytoplasm | GO:0005634 nucleus	PF04908.12 SH3BGR	IPR002109 Glutaredoxin | IPR006993 SH3-binding, glutamic acid-rich protein | IPR012336 Thioredoxin-like fold
ENSMUSG00000026249	105	314	1.62361	Up	0.0366202	ENSMUST00000027467;ENSMUST00000189793;ENSMUST00000190724;ENSMUST00000153862;ENSMUST00000191529;ENSMUST00000191026	Serpine2	protein_coding	serine (or cysteine) peptidase inhibitor, clade E, member 2 [Source:MGI Symbol;Acc:MGI:101780]	ENSMUSP00000027467,ENSMUSP00000140065,ENSMUSP00000140255	gi|6678099|ref|NP_033281.1|	glia-derived nexin precursor [Mus musculus] >gi|1346127|sp|Q07235.2|GDN_MOUSE RecName: Full=Glia-derived nexin; Short=GDN; AltName: Full=Peptidase inhibitor 7; Short=PI-7; AltName: Full=Protease nexin 1; Short=PN-1; AltName: Full=Protease nexin I; AltName: Full=Serine protease-inhibitor 4; AltName: Full=Serpin E2; Flags: Precursor >gi|551065|emb|CAA49777.1| protease-nexin 1 [Mus musculus] >gi|148…	sp|Q07235|GDN_MOUSE	Glia-derived nexin OS=Mus musculus GN=Serpine2 PE=1 SV=2	COG4826	176	Posttranslational modification, protein turnover, chaperones ;	Serine protease inhibitor	mmu:20720	Serpine2, B230326M24Rik, PAI-1, PI-7, PI7, PN-1, Spi4; serine (or cysteine) peptidase inhibitor, clade E, member 2; K16643 glia-derived nexin	GO:0045879 negative regulation of smoothened signaling pathway | GO:0061108 seminal vesicle epithelium development | GO:0033363 secretory granule organization | GO:0021683 cerebellar granular layer morphogenesis | GO:0042177 negative regulation of protein catabolic process | GO:0048505 regulation of timing of cell differentiation | GO:0061110 dense core granule biogenesis | GO:0050974 detection o…	GO:0008201 heparin binding | GO:0004867 serine-type endopeptidase inhibitor activity | GO:0005102 receptor binding	GO:0031232 extrinsic component of external side of plasma membrane | GO:0031594 neuromuscular junction | GO:0005829 cytosol | GO:0005615 extracellular space | GO:0031091 platelet alpha granule | GO:1903561 extracellular vesicle | GO:0043025 neuronal cell body | GO:0031012 extracellular matrix	PF00079.17 Serpin	IPR000215 Serpin family | IPR023795 Serpin, conserved site | IPR023796 Serpin domain
ENSMUSG00000110040	8	134	4.08912	Up	4.10192e-08	ENSMUST00000209263;ENSMUST00000133843	Gm49369	protein_coding	predicted gene, 49369 [Source:MGI Symbol;Acc:MGI:6121585]	ENSMUSP00000148223,ENSMUSP00000117247	gi|74220304|dbj|BAE31329.1|	unnamed protein product [Mus musculus]	sp|P18242|CATD_MOUSE	Cathepsin D OS=Mus musculus GN=Ctsd PE=1 SV=1	--	--	--	--	mmu:13033	Ctsd, CD, CatD; cathepsin D; K01379 cathepsin D [EC:3.4.23.5]	GO:0000045 autophagosome assembly | GO:0060441 epithelial tube branching involved in lung morphogenesis | GO:0006508 proteolysis | GO:0030163 protein catabolic process	GO:0042277 peptide binding | GO:0004190 aspartic-type endopeptidase activity	GO:0005764 lysosome | GO:0005739 mitochondrion | GO:0070062 extracellular exosome | GO:0005615 extracellular space | GO:0045121 membrane raft | GO:0031012 extracellular matrix	PF00026.20 Asp	IPR001461 Aspartic peptidase A1 family | IPR001969 Aspartic peptidase, active site | IPR021109 Aspartic peptidase domain | IPR033121 Peptidase family A1 domain | IPR033144 Cathepsin D
ENSMUSG00000036437	2	26	3.6629	Up	0.0183814	ENSMUST00000212588;ENSMUST00000039303	Npy1r	protein_coding	neuropeptide Y receptor Y1 [Source:MGI Symbol;Acc:MGI:104963]	ENSMUSP00000148417,ENSMUSP00000045530	gi|6754882|ref|NP_035064.1|	neuropeptide Y receptor type 1 [Mus musculus] >gi|417399|sp|Q04573.1|NPY1R_MOUSE RecName: Full=Neuropeptide Y receptor type 1; Short=NPY1-R >gi|53439|emb|CAA79157.1| NPY-1 receptor [Mus musculus] >gi|262109|gb|AAA12819.1| NPY-1 receptor [Mus musculus] >gi|961478|dbj|BAA09887.1| Neuropeptide Y-Y1alpha receptor [Mus musculus] >gi|30410856|gb|AAH51420.1| Npy1r protein [Mus musculus] >gi|148696752|gb…	sp|Q04573|NPY1R_MOUSE	Neuropeptide Y receptor type 1 OS=Mus musculus GN=Npy1r PE=1 SV=1	--	--	--	--	mmu:18166	Npy1r, Npyr, Y1-R; neuropeptide Y receptor Y1; K04204 neuropeptide Y receptor type 1	GO:0046888 negative regulation of hormone secretion | GO:0007166 cell surface receptor signaling pathway | GO:0007626 locomotory behavior | GO:0051481 negative regulation of cytosolic calcium ion concentration | GO:0003151 outflow tract morphogenesis | GO:0007218 neuropeptide signaling pathway | GO:0007568 aging | GO:0030432 peristalsis | GO:0032355 response to estradiol | GO:0045907 positive reg…	GO:0001602 pancreatic polypeptide receptor activity | GO:0001601 peptide YY receptor activity	GO:0005887 integral component of plasma membrane | GO:0005829 cytosol | GO:0030424 axon | GO:0008021 synaptic vesicle	PF00001.18 7tm_1	IPR000276 G protein-coupled receptor, rhodopsin-like | IPR000351 Neuropeptide Y1 receptor | IPR000611 Neuropeptide Y receptor family | IPR017452 GPCR, rhodopsin-like, 7TM
ENSMUSG00000028298	0	20	7.35316	Up	0.00670455	ENSMUST00000029975;ENSMUST00000135871;ENSMUST00000108130	Cga	protein_coding	glycoprotein hormones, alpha subunit [Source:MGI Symbol;Acc:MGI:88390]	ENSMUSP00000029975,ENSMUSP00000119152,ENSMUSP00000103765	gi|6753414|ref|NP_034019.1|	glycoprotein hormones alpha chain precursor [Mus musculus] >gi|121314|sp|P01216.1|GLHA_MOUSE RecName: Full=Glycoprotein hormones alpha chain; AltName: Full=Anterior pituitary glycoprotein hormones common subunit alpha; AltName: Full=Follicle-stimulating hormone alpha chain; Short=FSH-alpha; AltName: Full=Follitropin alpha chain; AltName: Full=Luteinizing hormone alpha chain; Short=LSH-alpha; AltN…	sp|P01216|GLHA_MOUSE	Glycoprotein hormones alpha chain OS=Mus musculus GN=Cga PE=2 SV=1	--	--	--	--	mmu:12640	Cga, CG-alpha, FSHA, GPHA1, GPHalpha, HCG, LHA, Tsha, aGSU, alpha-GSU, alphaGSU, alphaSU; glycoprotein hormones, alpha subunit; K08522 glycoprotein hormones, alpha polypeptide	GO:0030878 thyroid gland development | GO:0032275 luteinizing hormone secretion | GO:0046621 negative regulation of organ growth | GO:0046884 follicle-stimulating hormone secretion | GO:0032870 cellular response to hormone stimulus | GO:0008406 gonad development | GO:0006590 thyroid hormone generation	GO:0005179 hormone activity	GO:0005576 extracellular region	PF00236.15 Hormone_6	IPR000476 Glycoprotein hormone alpha chain | IPR029034 Cystine-knot cytokine
ENSMUSG00000020609	3	52	4.10352	Up	8.39489e-05	ENSMUST00000171271;ENSMUST00000037811;ENSMUST00000037520;ENSMUST00000171239	Apob	protein_coding	apolipoprotein B [Source:MGI Symbol;Acc:MGI:88052]	ENSMUSP00000127147,ENSMUSP00000036044,ENSMUSP00000035761,ENSMUSP00000129496	gi|161702988|ref|NP_033823.2|	apolipoprotein B-100 precursor [Mus musculus] >gi|449061789|sp|E9Q414.1|APOB_MOUSE RecName: Full=Apolipoprotein B-100; Short=Apo B-100; Contains: RecName: Full=Apolipoprotein B-48; Short=Apo B-48; Flags: Precursor	sp|E9Q414|APOB_MOUSE	Apolipoprotein B-100 OS=Mus musculus GN=Apob PE=1 SV=1	--	--	--	--	mmu:238055	Apob, AI315052, Apo_B-100, apob-100, apob-48; apolipoprotein B; K14462 apolipoprotein B	GO:0010886 positive regulation of cholesterol storage | GO:0042953 lipoprotein transport | GO:0009615 response to virus | GO:0032496 response to lipopolysaccharide | GO:0045540 regulation of cholesterol biosynthetic process | GO:0010628 positive regulation of gene expression | GO:0033344 cholesterol efflux | GO:0010269 response to selenium ion | GO:0042159 lipoprotein catabolic process | GO:00343…	GO:0035473 lipase binding | GO:0050750 low-density lipoprotein particle receptor binding | GO:0005543 phospholipid binding | GO:0008201 heparin binding | GO:0017127 cholesterol transporter activity	GO:0012506 vesicle membrane | GO:0015629 actin cytoskeleton | GO:0034361 very-low-density lipoprotein particle | GO:0005794 Golgi apparatus | GO:0034363 intermediate-density lipoprotein particle | GO:0043025 neuronal cell body | GO:0070062 extracellular exosome | GO:0005783 endoplasmic reticulum | GO:0034359 mature chylomicron | GO:0005886 plasma membrane | GO:0034362 low-density lipoprotein part…	PF01347.19 Vitellogenin_N	IPR001747 Lipid transport protein, N-terminal | IPR009454 Lipid transport, open beta-sheet | IPR011030 Vitellinogen, superhelical | IPR015255 Vitellinogen, open beta-sheet | IPR015816 Vitellinogen, beta-sheet N-terminal | IPR015817 Vitellinogen, open beta-sheet, subdomain 1 | IPR015818 Vitellinogen, open beta-sheet, subdomain 2 | IPR015819 Lipid transport protein, beta-sheet shell | IPR022176 Apo…
ENSMUSG00000057286	31	3	-3.27271	Down	0.0136195	ENSMUST00000079545;ENSMUST00000135771;ENSMUST00000123236;ENSMUST00000129236;ENSMUST00000145441	St6galnac2	protein_coding	ST6 (alpha-N-acetyl-neuraminyl-2,3-beta-galactosyl-1,3)-N-acetylgalactosaminide alpha-2,6-sialyltransferase 2 [Source:MGI Symbol;Acc:MGI:107553]	ENSMUSP00000078501	gi|31543707|ref|NP_033206.2|	alpha-N-acetylgalactosaminide alpha-2,6-sialyltransferase 2 [Mus musculus] >gi|51338791|sp|P70277.2|SIA7B_MOUSE RecName: Full=Alpha-N-acetylgalactosaminide alpha-2,6-sialyltransferase 2; AltName: Full=Gal-beta-1,3-GalNAc alpha-2,6-sialyltransferase; AltName: Full=GalNAc alpha-2,6-sialyltransferase II; AltName: Full=ST6GalNAc II; Short=ST6GalNAcII; AltName: Full=Sialyltransferase 7B; Short=SIAT7-B…	sp|P70277|SIA7B_MOUSE	Alpha-N-acetylgalactosaminide alpha-2,6-sialyltransferase 2 OS=Mus musculus GN=St6galnac2 PE=2 SV=2	--	--	--	--	mmu:20446	St6galnac2, II, ST6GalNAc, Siat7, Siat7b; ST6 (alpha-N-acetyl-neuraminyl-2,3-beta-galactosyl-1,3)-N-acetylgalactosaminide alpha-2,6-sialyltransferase 2; K06616 alpha-N-acetylgalactosaminide alpha-2,6-sialyltransferase (sialyltransferase 7B) [EC:2.4.99.-]	GO:0018279 protein N-linked glycosylation via asparagine | GO:0001574 ganglioside biosynthetic process | GO:0009311 oligosaccharide metabolic process | GO:0097503 sialylation	GO:0008932 lytic endotransglycosylase activity | GO:0008373 sialyltransferase activity	GO:0030173 integral component of Golgi membrane	PF00777.15 Glyco_transf_29	IPR001675 Glycosyl transferase family 29 | IPR012163 Sialyltransferase
ENSMUSG00000071047	19	1	-4.04566	Down	0.0421536	ENSMUST00000095211;ENSMUST00000209753	Ces1a	protein_coding	carboxylesterase 1A [Source:MGI Symbol;Acc:MGI:3648919]	ENSMUSP00000092836	gi|283135142|ref|NP_001013786.2|	carboxylesterase 1-like precursor [Mus musculus]	sp|P12337|EST1_RABIT	Liver carboxylesterase 1 OS=Oryctolagus cuniculus PE=1 SV=3	COG2272	231	Lipid transport and metabolism ;	Carboxylesterase type B	ocu:100009551	liver carboxylesterase; K01044 carboxylesterase 1 [EC:3.1.1.1]	--	GO:0034892 endosulfan lactone lactonase activity | GO:0043907 Cys-tRNA(Pro) hydrolase activity | GO:0080030 methyl indole-3-acetate esterase activity | GO:0047376 all-trans-retinyl-palmitate hydrolase, all-trans-retinol forming activity | GO:0043908 Ser(Gly)-tRNA(Ala) hydrolase activity | GO:0018731 1-oxa-2-oxocycloheptane lactonase activity | GO:0010296 prenylcysteine methylesterase activity | G…	GO:0005615 extracellular space	PF00135.25 COesterase	IPR002018 Carboxylesterase, type B | IPR019819 Carboxylesterase type B, conserved site | IPR019826 Carboxylesterase type B, active site | IPR029058 Alpha/Beta hydrolase fold
ENSMUSG00000041697	3466	876	-1.9397	Down	0.00189023	ENSMUST00000040154;ENSMUST00000137766	Cox6a1	protein_coding	cytochrome c oxidase subunit 6A1 [Source:MGI Symbol;Acc:MGI:103099]	ENSMUSP00000047661	gi|6680988|ref|NP_031774.1|	cytochrome c oxidase subunit 6A1, mitochondrial [Mus musculus] >gi|567766|gb|AAA53066.1| cytochrome c oxidase [Mus musculus] >gi|13277855|gb|AAH03807.1| Cytochrome c oxidase, subunit VI a, polypeptide 1 [Mus musculus] >gi|56078778|gb|AAH52816.1| Cytochrome c oxidase, subunit VI a, polypeptide 1 [Mus musculus] >gi|148687915|gb|EDL19862.1| cytochrome c oxidase, subunit VI a, polypeptide 1 [Mus musc…	sp|P43024|CX6A1_MOUSE	Cytochrome c oxidase subunit 6A1, mitochondrial OS=Mus musculus GN=Cox6a1 PE=1 SV=2	--	--	--	--	mmu:12861	Cox6a1, VIaL; cytochrome c oxidase subunit VIa polypeptide 1; K02266 cytochrome c oxidase subunit 6a	GO:1902600 hydrogen ion transmembrane transport	GO:0004129 cytochrome-c oxidase activity	GO:0016021 integral component of membrane | GO:0005751 mitochondrial respiratory chain complex IV | GO:0043209 myelin sheath	PF02046.12 COX6A	--
ENSMUSG00000098650	151	708	2.27266	Up	0.000184902	ENSMUST00000160826	Gm28048	protein_coding	predicted gene, 28048 [Source:MGI Symbol;Acc:MGI:5547784]	ENSMUSP00000125609	gi|568969971|ref|XP_006514626.1|	PREDICTED: COMM domain-containing protein 1 isoform X1 [Mus musculus]	sp|Q8K4M5|COMD1_MOUSE	COMM domain-containing protein 1 OS=Mus musculus GN=Commd1 PE=1 SV=2	--	--	--	--	--	--	GO:1902072 negative regulation of hypoxia-inducible factor-1alpha signaling pathway | GO:0032088 negative regulation of NF-kappaB transcription factor activity | GO:0015031 protein transport | GO:0031398 positive regulation of protein ubiquitination | GO:0048227 plasma membrane to endosome transport | GO:0006893 Golgi to plasma membrane transport | GO:0031648 protein destabilization | GO:0006878 …	GO:0043325 phosphatidylinositol-3,4-bisphosphate binding | GO:0042803 protein homodimerization activity | GO:0005507 copper ion binding | GO:0070300 phosphatidic acid binding | GO:0019871 sodium channel inhibitor activity | GO:0005547 phosphatidylinositol-3,4,5-trisphosphate binding | GO:0080025 phosphatidylinositol-3,5-bisphosphate binding | GO:0005546 phosphatidylinositol-4,5-bisphosphate bindi…	GO:0031410 cytoplasmic vesicle | GO:0055037 recycling endosome | GO:0005654 nucleoplasm | GO:0070062 extracellular exosome | GO:0005769 early endosome | GO:0031462 Cul2-RING ubiquitin ligase complex | GO:0016020 membrane	PF07258.11 HCaRG	IPR009886 HCaRG | IPR017920 COMM domain
ENSMUSG00000068876	207	59	-1.76431	Down	0.0252625	ENSMUST00000107272;ENSMUST00000107273;ENSMUST00000238849;ENSMUST00000239156;ENSMUST00000153263;ENSMUST00000155485	Cgn	protein_coding	cingulin [Source:MGI Symbol;Acc:MGI:1927237]	ENSMUSP00000102893,ENSMUSP00000102894,ENSMUSP00000143156,ENSMUSP00000142809,ENSMUSP00000159109,ENSMUSP00000159039	gi|189458807|ref|NP_001032800.2|	cingulin isoform 1 [Mus musculus]	sp|P59242|CING_MOUSE	Cingulin OS=Mus musculus GN=Cgn PE=1 SV=1	--	--	--	--	mmu:70737	Cgn, 6330408J11Rik; cingulin; K06102 cingulin	GO:0003382 epithelial cell morphogenesis | GO:0000226 microtubule cytoskeleton organization | GO:0070830 bicellular tight junction assembly	GO:0008017 microtubule binding | GO:0003774 motor activity	GO:0005903 brush border | GO:0016459 myosin complex | GO:0005923 bicellular tight junction	PF01576.16 Myosin_tail_1	IPR002928 Myosin tail
ENSMUSG00000056174	17	97	2.54796	Up	0.00180576	ENSMUST00000070132;ENSMUST00000128435	Col8a2	protein_coding	collagen, type VIII, alpha 2 [Source:MGI Symbol;Acc:MGI:88464]	ENSMUSP00000070270,ENSMUSP00000123003	gi|148698346|gb|EDL30293.1|	procollagen, type VIII, alpha 2 [Mus musculus]	sp|P25318|CO8A2_MOUSE	Collagen alpha-2(VIII) chain OS=Mus musculus GN=Col8a2 PE=2 SV=2	--	--	--	--	gja:107108602	COL10A1; collagen type X alpha 1 chain; K19479 collagen, type X, alpha	GO:0001525 angiogenesis | GO:0048593 camera-type eye morphogenesis | GO:0007155 cell adhesion | GO:0050673 epithelial cell proliferation	--	GO:0005581 collagen trimer | GO:0005604 basement membrane	PF01391.15 Collagen	IPR001073 C1q domain | IPR008160 Collagen triple helix repeat | IPR008983 Tumour necrosis factor-like domain
ENSMUSG00000046179	140	39	-1.79623	Down	0.0366202	ENSMUST00000058745;ENSMUST00000119223;ENSMUST00000151139;ENSMUST00000136142	E2f8	protein_coding	E2F transcription factor 8 [Source:MGI Symbol;Acc:MGI:1922038]	ENSMUSP00000056778,ENSMUSP00000112883	gi|148691021|gb|EDL22968.1|	E2F transcription factor 8, partial [Mus musculus]	sp|Q58FA4|E2F8_MOUSE	Transcription factor E2F8 OS=Mus musculus GN=E2f8 PE=1 SV=1	--	--	--	--	mmu:108961	E2f8, 4432406C08Rik, AA410048; E2F transcription factor 8; K09391 transcription factor E2F7/8	GO:0000122 negative regulation of transcription from RNA polymerase II promoter | GO:0033301 cell cycle comprising mitosis without cytokinesis | GO:0008283 cell proliferation | GO:0060718 chorionic trophoblast cell differentiation | GO:0002040 sprouting angiogenesis | GO:0070365 hepatocyte differentiation | GO:0060707 trophoblast giant cell differentiation | GO:0032877 positive regulation of DNA …	GO:0003714 transcription corepressor activity | GO:0001047 core promoter binding | GO:0000978 RNA polymerase II core promoter proximal region sequence-specific DNA binding | GO:0001078 transcriptional repressor activity, RNA polymerase II core promoter proximal region sequence-specific binding | GO:0042803 protein homodimerization activity	GO:0005667 transcription factor complex | GO:0005634 nucleus	PF02319.17 E2F_TDP	IPR003316 E2F/DP family, winged-helix DNA-binding domain | IPR011991 Winged helix-turn-helix DNA-binding domain | IPR015633 E2F Family
ENSMUSG00000064363	928	263	-1.77417	Down	0.0087142	ENSMUST00000082414	mt-Nd4	protein_coding	mitochondrially encoded NADH dehydrogenase 4 [Source:MGI Symbol;Acc:MGI:102498]	ENSMUSP00000081000	gi|4379192|emb|CAA24091.1|	unnamed protein product [Mus musculus]	sp|P03911|NU4M_MOUSE	NADH-ubiquinone oxidoreductase chain 4 OS=Mus musculus GN=Mtnd4 PE=1 SV=1	COG1008	231	Energy production and conversion ;	NADH:ubiquinone oxidoreductase subunit 4 (chain M)	mmu:17719	ND4; NADH dehydrogenase subunit 4; K03881 NADH-ubiquinone oxidoreductase chain 4 [EC:1.6.5.3]	GO:0006120 mitochondrial electron transport, NADH to ubiquinone	GO:0008137 NADH dehydrogenase (ubiquinone) activity	GO:0016021 integral component of membrane | GO:0005739 mitochondrion	PF01059.14 Oxidored_q5_N	--
ENSMUSG00000074210	0	52	8.72623	Up	2.85611e-07	ENSMUST00000098585	E130208F15Rik	protein_coding	RIKEN cDNA E130208F15 gene [Source:MGI Symbol;Acc:MGI:3767226]	ENSMUSP00000096184	gi|74226189|dbj|BAE25291.1|	unnamed protein product [Mus musculus]	--	--	--	--	--	--	--	--	--	--	--	--	--
ENSMUSG00000019874	1	24	4.46437	Up	0.00923342	ENSMUST00000020024;ENSMUST00000165013	Fabp7	protein_coding	fatty acid binding protein 7, brain [Source:MGI Symbol;Acc:MGI:101916]	ENSMUSP00000020024,ENSMUSP00000131415	gi|149038599|gb|EDL92888.1|	fatty acid binding protein 7, brain, isoform CRA_b, partial [Rattus norvegicus]	sp|P51880|FABP7_MOUSE	Fatty acid-binding protein, brain OS=Mus musculus GN=Fabp7 PE=1 SV=2	--	--	--	--	mmu:12140	Fabp7, B-FABP, BFABP, Blbp, MRG; fatty acid binding protein 7, brain; K08756 fatty acid-binding protein 7, brain	GO:0021846 cell proliferation in forebrain | GO:0006810 transport | GO:0022008 neurogenesis | GO:0060134 prepulse inhibition | GO:0050673 epithelial cell proliferation	GO:0005215 transporter activity | GO:0005504 fatty acid binding	GO:0005829 cytosol | GO:0071944 cell periphery | GO:0042995 cell projection | GO:0005911 cell-cell junction | GO:0043025 neuronal cell body | GO:0005654 nucleoplasm | GO:0016020 membrane	PF00061.20 Lipocalin	IPR000463 Cytosolic fatty-acid binding | IPR000566 Lipocalin/cytosolic fatty-acid binding domain | IPR011038 Calycin-like | IPR012674 Calycin | IPR031259 Intracellular lipid binding protein
ENSMUSG00000049848	18	0	-7.15802	Down	0.0130322	ENSMUST00000052605	Ceacam19	protein_coding	carcinoembryonic antigen-related cell adhesion molecule 19 [Source:MGI Symbol;Acc:MGI:2443001]	ENSMUSP00000057433	gi|26339048|dbj|BAC33195.1|	unnamed protein product [Mus musculus]	sp|Q7Z692|CEA19_HUMAN	Carcinoembryonic antigen-related cell adhesion molecule 19 OS=Homo sapiens GN=CEACAM19 PE=1 SV=2	--	--	--	--	mmu:319930	Ceacam19, C130022P09Rik, CEAL1; carcinoembryonic antigen-related cell adhesion molecule 19; K16825 carcinoembryonic antigen-related cell adhesion molecule 19	--	--	GO:0016021 integral component of membrane	PF07686.14 V-set	IPR007110 Immunoglobulin-like domain | IPR013106 Immunoglobulin V-set domain | IPR013783 Immunoglobulin-like fold
ENSMUSG00000029409	47	533	3.54426	Up	7.9627e-10	ENSMUST00000201332;ENSMUST00000031356;ENSMUST00000202847	U90926	protein_coding	cDNA sequence U90926 [Source:MGI Symbol;Acc:MGI:1930915]	--	--	--	--	--	--	--	--	--	--	--	--	--	--	--	--
ENSMUSG00000026110	35	5	-2.73308	Down	0.0286565	ENSMUST00000042161;ENSMUST00000151952;ENSMUST00000154819;ENSMUST00000143636;ENSMUST00000149791;ENSMUST00000148047;ENSMUST00000194660;ENSMUST00000195598	Mgat4a	protein_coding	mannoside acetylglucosaminyltransferase 4, isoenzyme A [Source:MGI Symbol;Acc:MGI:2662992]	ENSMUSP00000114175,ENSMUSP00000121181,ENSMUSP00000122909,ENSMUSP00000115778,ENSMUSP00000118692,ENSMUSP00000038894	gi|33239362|ref|NP_776295.1|	alpha-1,3-mannosyl-glycoprotein 4-beta-N-acetylglucosaminyltransferase A isoform 1 [Mus musculus] >gi|81866195|sp|Q812G0.1|MGT4A_MOUSE RecName: Full=Alpha-1,3-mannosyl-glycoprotein 4-beta-N-acetylglucosaminyltransferase A; AltName: Full=N-glycosyl-oligosaccharide-glycoprotein N-acetylglucosaminyltransferase IVa; Short=GlcNAc-T IVa; Short=GnT-IVa; Short=N-acetylglucosaminyltransferase IVa; AltName…	sp|Q812G0|MGT4A_MOUSE	Alpha-1,3-mannosyl-glycoprotein 4-beta-N-acetylglucosaminyltransferase A OS=Mus musculus GN=Mgat4a PE=2 SV=1	--	--	--	--	mmu:269181	Mgat4a, 9530018I07Rik, GnT-IVa, glcNAc-T-IVa; mannoside acetylglucosaminyltransferase 4, isoenzyme A; K00738 alpha-1,3-mannosylglycoprotein beta-1,4-N-acetylglucosaminyltransferase A/B [EC:2.4.1.145]	GO:0006491 N-glycan processing	GO:0046872 metal ion binding | GO:0008454 alpha-1,3-mannosylglycoprotein 4-beta-N-acetylglucosaminyltransferase activity	GO:0016021 integral component of membrane | GO:0000139 Golgi membrane | GO:0070062 extracellular exosome	PF04666.10 Glyco_transf_54	IPR006759 Glycosyl transferase family 54
ENSMUSG00000026580	17	154	3.21416	Up	3.74384e-06	ENSMUST00000162746;ENSMUST00000160000;ENSMUST00000161152;ENSMUST00000161020;ENSMUST00000162102	Selp	protein_coding	selectin, platelet [Source:MGI Symbol;Acc:MGI:98280]	ENSMUSP00000123924,ENSMUSP00000124231	gi|6755456|ref|NP_035477.1|	P-selectin precursor [Mus musculus] >gi|266459|sp|Q01102.1|LYAM3_MOUSE RecName: Full=P-selectin; AltName: Full=CD62 antigen-like family member P; AltName: Full=Granule membrane protein 140; Short=GMP-140; AltName: Full=Leukocyte-endothelial cell adhesion molecule 3; Short=LECAM3; AltName: Full=Platelet activation dependent granule-external membrane protein; Short=PADGEM; AltName: CD_antigen=CD62P…	sp|Q01102|LYAM3_MOUSE	P-selectin OS=Mus musculus GN=Selp PE=1 SV=1	--	--	--	--	mmu:20344	Selp, CD62P, GMP-140, Grmp, LECAM3, PADGEM; selectin, platelet; K06496 selectin, platele	GO:0050901 leukocyte tethering or rolling | GO:0002691 regulation of cellular extravasation | GO:0033623 regulation of integrin activation | GO:0032496 response to lipopolysaccharide | GO:0007626 locomotory behavior | GO:0071354 cellular response to interleukin-6 | GO:0010572 positive regulation of platelet activation | GO:0040007 growth | GO:0014068 positive regulation of phosphatidylinositol 3-…	GO:0042806 fucose binding | GO:0048306 calcium-dependent protein binding | GO:0033691 sialic acid binding | GO:0001948 glycoprotein binding | GO:0001530 lipopolysaccharide binding | GO:0008201 heparin binding | GO:0070492 oligosaccharide binding | GO:0008430 selenium binding	GO:0005654 nucleoplasm | GO:0005615 extracellular space | GO:0009897 external side of plasma membrane | GO:0016021 integral component of membrane | GO:0070062 extracellular exosome | GO:0031092 platelet alpha granule membrane	PF00059.18 Lectin_C	IPR000436 Sushi/SCR/CCP domain | IPR000742 EGF-like domain | IPR001304 C-type lectin | IPR001881 EGF-like calcium-binding domain | IPR002396 Selectin superfamily | IPR013032 EGF-like, conserved site | IPR016186 C-type lectin-like | IPR016187 C-type lectin fold | IPR018378 C-type lectin, conserved site
ENSMUSG00000046229	365	120	-1.55947	Down	0.0491322	ENSMUST00000079125	Scand1	protein_coding	SCAN domain-containing 1 [Source:MGI Symbol;Acc:MGI:1343132]	ENSMUSP00000105211	gi|158749618|ref|NP_064651.2|	SCAN domain-containing protein 1 [Mus musculus] >gi|62635490|gb|AAX90614.1| Scand1 [Mus musculus] >gi|148674242|gb|EDL06189.1| SCAN domain-containing 1 [Mus musculus]	sp|Q32PG5|SCND1_BOVIN	SCAN domain-containing protein 1 OS=Bos taurus GN=SCAND1 PE=2 SV=1	--	--	--	--	ecb:100067081	ZNF396; zinc finger protein 396; K09230 SCAN domain-containing zinc finger protein	GO:0006355 regulation of transcription, DNA-templated	GO:0003713 transcription coactivator activity | GO:0003700 transcription factor activity, sequence-specific DNA binding	GO:0005634 nucleus	PF02023.14 SCAN	--
ENSMUSG00000060678	5163	835	-2.58377	Down	2.88404e-06	ENSMUST00000102967	H4c3	protein_coding	H4 clustered histone 3 [Source:MGI Symbol;Acc:MGI:2448421]	ENSMUSP00000100032	gi|1007715256|ref|XP_015799297.1|	PREDICTED: histone H4-like [Nothobranchius furzeri]	sp|Q28DR4|H4_XENTR	Histone H4 OS=Xenopus tropicalis GN=TGas006m08.1 PE=3 SV=1	COG2036	162	Chromatin structure and dynamics ;	Histones H3 and H4	sko:102801869	histone H4-like; K11254 histone H4	GO:0000278 mitotic cell cycle | GO:0031047 gene silencing by RNA | GO:0045815 positive regulation of gene expression, epigenetic | GO:0000183 chromatin silencing at rDNA | GO:0000724 double-strand break repair via homologous recombination | GO:1904837 beta-catenin-TCF complex assembly | GO:0006303 double-strand break repair via nonhomologous end joining | GO:0051290 protein heterotetramerization …	GO:0035575 histone demethylase activity (H4-K20 specific) | GO:0042393 histone binding | GO:0044822 poly(A) RNA binding | GO:0046982 protein heterodimerization activity | GO:0019904 protein domain specific binding | GO:0003677 DNA binding	GO:0005654 nucleoplasm | GO:0016020 membrane | GO:0000784 nuclear chromosome, telomeric region | GO:0000786 nucleosome | GO:0070062 extracellular exosome	PF15511.3 CENP-T_C	IPR001951 Histone H4 | IPR004823 TATA box binding protein associated factor (TAF) | IPR009072 Histone-fold | IPR019809 Histone H4, conserved site
ENSMUSG00000074922	33	3	-3.36255	Down	0.00875389	ENSMUST00000099556	Fam122a	protein_coding	family with sequence similarity 122, member A [Source:MGI Symbol;Acc:MGI:1915284]	ENSMUSP00000097152	gi|19882245|ref|NP_080796.1|	protein FAM122A [Mus musculus] >gi|68565284|sp|Q9DB52.1|F122A_MOUSE RecName: Full=Protein FAM122A >gi|20306430|gb|AAH28637.1| Family with sequence similarity 122, member A [Mus musculus] >gi|52789277|gb|AAH83062.1| Family with sequence similarity 122, member A [Mus musculus]	sp|Q9DB52|F122A_MOUSE	Protein FAM122A OS=Mus musculus GN=Fam122a PE=1 SV=1	--	--	--	--	--	--	--	--	--	--	IPR026716 FAM122
ENSMUSG00000019689	437	141	-1.58668	Down	0.0386912	ENSMUST00000147651;ENSMUST00000019833	Fmc1	protein_coding	formation of mitochondrial complex V assembly factor 1 [Source:MGI Symbol;Acc:MGI:1913367]	ENSMUSP00000019833	gi|13384728|ref|NP_079639.1|	UPF0562 protein C7orf55 homolog [Mus musculus] >gi|81916771|sp|Q9CR13.1|CG055_MOUSE RecName: Full=UPF0562 protein C7orf55 homolog >gi|37748094|gb|AAH59710.1| Formation of mitochondrial complexes 1 homolog (S. cerevisiae) [Mus musculus] >gi|148681684|gb|EDL13631.1| RIKEN cDNA 1110001J03, isoform CRA_b [Mus musculus]	sp|Q9CR13|CG055_MOUSE	UPF0562 protein C7orf55 homolog OS=Mus musculus PE=1 SV=1	--	--	--	--	hsa:100996928	C7orf55-LUC7L2; C7orf55-LUC7L2 readthrough; K13212 RNA-binding protein Luc7-like 2	GO:0061469 regulation of type B pancreatic cell proliferation | GO:0050995 negative regulation of lipid catabolic process	--	GO:0005739 mitochondrion	--	--
ENSMUSG00000035557	1	26	4.57928	Up	0.00542559	ENSMUST00000080893	Krt17	protein_coding	keratin 17 [Source:MGI Symbol;Acc:MGI:96691]	ENSMUSP00000079699	gi|7106335|ref|NP_034793.1|	keratin, type I cytoskeletal 17 [Mus musculus] >gi|23396626|sp|Q9QWL7.3|K1C17_MOUSE RecName: Full=Keratin, type I cytoskeletal 17; AltName: Full=Cytokeratin-17; Short=CK-17; AltName: Full=Keratin-17; Short=K17 >gi|3868804|dbj|BAA34229.1| cytokeratin 17 [Mus musculus] >gi|124375720|gb|AAI32455.1| Keratin 17 [Mus musculus] >gi|124375722|gb|AAI32457.1| Keratin 17 [Mus musculus] >gi|148670624|gb|EDL0…	sp|Q9QWL7|K1C17_MOUSE	Keratin, type I cytoskeletal 17 OS=Mus musculus GN=Krt17 PE=1 SV=3	--	--	--	--	mmu:16667	Krt17, K17, Krt1-17; keratin 17; K07604 type I keratin, acidic	GO:0030307 positive regulation of cell growth | GO:0051798 positive regulation of hair follicle development | GO:0031424 keratinization | GO:0045727 positive regulation of translation | GO:0031069 hair follicle morphogenesis | GO:0007165 signal transduction | GO:0045109 intermediate filament organization	GO:0042289 MHC class II protein binding | GO:0032395 MHC class II receptor activity | GO:0005200 structural constituent of cytoskeleton	GO:0071944 cell periphery | GO:0005737 cytoplasm | GO:0045095 keratin filament | GO:0070062 extracellular exosome	PF00038.18 Filament	IPR001664 Intermediate filament protein | IPR002957 Keratin, type I | IPR009053 Prefoldin | IPR018039 Intermediate filament protein, conserved site
ENSMUSG00000047721	316	59	-2.37429	Down	0.000221545	ENSMUST00000144571;ENSMUST00000130498;ENSMUST00000052145;ENSMUST00000106369;ENSMUST00000206275	Bola2	protein_coding	bolA-like 2 (E. coli) [Source:MGI Symbol;Acc:MGI:1913412]	ENSMUSP00000114873,ENSMUSP00000101977	gi|46016011|pdb|1V9J|A	Chain A, Solution Structure Of A Bola-Like Protein From Mus Musculus	sp|Q8BGS2|BOLA2_MOUSE	BolA-like protein 2 OS=Mus musculus GN=Bola2 PE=1 SV=1	COG0271	58.5	Signal transduction mechanisms ;	Stress-induced morphogen (activity unknown)	mze:101469705	bola1; bolA family member 1; K05527 BolA protein	--	--	GO:0070062 extracellular exosome	PF01722.15 BolA	--
ENSMUSG00000021496	84	20	-2.0193	Down	0.0260759	ENSMUST00000021958;ENSMUST00000124968	Pcbd2	protein_coding	pterin 4 alpha carbinolamine dehydratase/dimerization cofactor of hepatocyte nuclear factor 1 alpha (TCF1) 2 [Source:MGI Symbol;Acc:MGI:1919812]	ENSMUSP00000115392,ENSMUSP00000021958	gi|52421794|ref|NP_082557.1|	pterin-4-alpha-carbinolamine dehydratase 2 [Mus musculus] >gi|239938680|sp|Q9CZL5.2|PHS2_MOUSE RecName: Full=Pterin-4-alpha-carbinolamine dehydratase 2; Short=PHS 2; AltName: Full=4-alpha-hydroxy-tetrahydropterin dehydratase 2; AltName: Full=DcoH-like protein DCoHm; AltName: Full=Dimerization cofactor of hepatocyte nuclear factor 1 from muscle; AltName: Full=HNF-1-alpha dimerization cofactor >gi|…	sp|Q9CZL5|PHS2_MOUSE	Pterin-4-alpha-carbinolamine dehydratase 2 OS=Mus musculus GN=Pcbd2 PE=1 SV=2	COG2154	120	Coenzyme transport and metabolism ;	Pterin-4a-carbinolamine dehydratase	mmu:72562	Pcbd2, 2700061N24Rik, Dcoh2, Dcohm; pterin 4 alpha carbinolamine dehydratase/dimerization cofactor of hepatocyte nuclear factor 1 alpha (TCF1) 2; K01724 4a-hydroxytetrahydrobiopterin dehydratase [EC:4.2.1.96]	GO:0045893 positive regulation of transcription, DNA-templated | GO:0051291 protein heterooligomerization | GO:0055114 oxidation-reduction process | GO:0006729 tetrahydrobiopterin biosynthetic process | GO:0051289 protein homotetramerization	GO:0005515 protein binding | GO:0008124 4-alpha-hydroxytetrahydrobiopterin dehydratase activity | GO:0004505 phenylalanine 4-monooxygenase activity	GO:0005739 mitochondrion | GO:0005634 nucleus	PF01329.16 Pterin_4a	--
ENSMUSG00000022483	8	42	2.41825	Up	0.0384285	ENSMUST00000088355;ENSMUST00000023123;ENSMUST00000131560;ENSMUST00000131910;ENSMUST00000128547;ENSMUST00000139246;ENSMUST00000133488;ENSMUST00000127879;ENSMUST00000140064;ENSMUST00000230148	Col2a1	protein_coding	collagen, type II, alpha 1 [Source:MGI Symbol;Acc:MGI:88452]	ENSMUSP00000085693,ENSMUSP00000023123	gi|148672265|gb|EDL04212.1|	procollagen, type II, alpha 1, isoform CRA_a, partial [Mus musculus]	sp|P28481|CO2A1_MOUSE	Collagen alpha-1(II) chain OS=Mus musculus GN=Col2a1 PE=1 SV=2	--	--	--	--	mmu:12824	Col2a1, Col2, Col2a, Col2a-1, Del1, Dmm, Lpk, Rgsc856; collagen, type II, alpha 1; K19719 collagen, type II, alpha	GO:0003007 heart morphogenesis | GO:0060351 cartilage development involved in endochondral bone morphogenesis | GO:0060021 palate development | GO:0007605 sensory perception of sound | GO:0002062 chondrocyte differentiation | GO:0006029 proteoglycan metabolic process | GO:2001240 negative regulation of extrinsic apoptotic signaling pathway in absence of ligand | GO:0010468 regulation of gene expr…	GO:0005201 extracellular matrix structural constituent | GO:0048407 platelet-derived growth factor binding | GO:0046872 metal ion binding | GO:0042802 identical protein binding	GO:0005604 basement membrane | GO:0005615 extracellular space | GO:0005737 cytoplasm | GO:0005585 collagen type II trimer	PF00093.15 VWC	IPR000885 Fibrillar collagen, C-terminal | IPR001007 VWFC domain | IPR008160 Collagen triple helix repeat
ENSMUSG00000037411	8559	24166	1.54187	Up	0.031576	ENSMUST00000041388;ENSMUST00000077523;ENSMUST00000199832	Serpine1	protein_coding	serine (or cysteine) peptidase inhibitor, clade E, member 1 [Source:MGI Symbol;Acc:MGI:97608]	ENSMUSP00000039586,ENSMUSP00000076728	gi|170172562|ref|NP_032897.2|	plasminogen activator inhibitor 1 precursor [Mus musculus] >gi|148687340|gb|EDL19287.1| serine (or cysteine) peptidase inhibitor, clade E, member 1, isoform CRA_b [Mus musculus]	sp|P22777|PAI1_MOUSE	Plasminogen activator inhibitor 1 OS=Mus musculus GN=Serpine1 PE=1 SV=1	COG4826	177	Posttranslational modification, protein turnover, chaperones ;	Serine protease inhibitor	mmu:18787	Serpine1, PAI-1, PAI1, Planh1; serine (or cysteine) peptidase inhibitor, clade E, member 1; K03982 plasminogen activator inhibitor 1	GO:0048146 positive regulation of fibroblast proliferation | GO:0061044 negative regulation of vascular wound healing | GO:0045766 positive regulation of angiogenesis | GO:2000352 negative regulation of endothelial cell apoptotic process | GO:0051918 negative regulation of fibrinolysis | GO:0010469 regulation of receptor activity | GO:0010757 negative regulation of plasminogen activation | GO:003…	GO:0004867 serine-type endopeptidase inhibitor activity | GO:0005102 receptor binding | GO:0002020 protease binding	GO:0042583 chromaffin granule | GO:0005615 extracellular space | GO:0070062 extracellular exosome | GO:0031012 extracellular matrix	PF00079.17 Serpin	IPR000215 Serpin family | IPR023795 Serpin, conserved site | IPR023796 Serpin domain
ENSMUSG00000034892	7369	1076	-2.73123	Down	4.26611e-07	ENSMUST00000037023;ENSMUST00000094291	Rps29	protein_coding	ribosomal protein S29 [Source:MGI Symbol;Acc:MGI:107681]	ENSMUSP00000038352	gi|1007724675|ref|XP_015803583.1|	PREDICTED: 40S ribosomal protein S29 [Nothobranchius furzeri]	sp|P62275|RS29_RAT	40S ribosomal protein S29 OS=Rattus norvegicus GN=Rps29 PE=1 SV=2	COG0199	82.8	Translation, ribosomal structure and biogenesis ;	Ribosomal protein S14	xtr:549520	rps29; ribosomal protein S29; K02980 small subunit ribosomal protein S29e	GO:0001525 angiogenesis | GO:0000184 nuclear-transcribed mRNA catabolic process, nonsense-mediated decay | GO:0006415 translational termination | GO:0006413 translational initiation | GO:0072332 intrinsic apoptotic signaling pathway by p53 class mediator | GO:0060218 hematopoietic stem cell differentiation | GO:0016259 selenocysteine metabolic process | GO:0048821 erythrocyte development | GO:000…	GO:0008270 zinc ion binding | GO:0003723 RNA binding | GO:0003735 structural constituent of ribosome	GO:0005925 focal adhesion | GO:0005654 nucleoplasm | GO:0070062 extracellular exosome | GO:0022627 cytosolic small ribosomal subunit	PF00253.18 Ribosomal_S14	IPR001209 Ribosomal protein S14 | IPR018271 Ribosomal protein S14, conserved site
ENSMUSG00000048078	78	16	-2.23228	Down	0.012361	ENSMUST00000107162;ENSMUST00000144263;ENSMUST00000133770;ENSMUST00000129445;ENSMUST00000138760;ENSMUST00000107166;ENSMUST00000107165;ENSMUST00000129737;ENSMUST00000131541;ENSMUST00000140140;ENSMUST00000130299;ENSMUST00000147659	Tenm4	protein_coding	teneurin transmembrane protein 4 [Source:MGI Symbol;Acc:MGI:2447063]	ENSMUSP00000102780,ENSMUSP00000114281,ENSMUSP00000102784,ENSMUSP00000102783,ENSMUSP00000120529,ENSMUSP00000145766	gi|894216254|ref|NP_001297689.1|	teneurin-4 isoform 1 [Mus musculus]	sp|Q3UHK6|TEN4_MOUSE	Teneurin-4 OS=Mus musculus GN=Tenm4 PE=1 SV=2	--	--	--	--	oaa:100084954	TNN; tenascin N; K06252 tenascin	GO:0048666 neuron development | GO:0031643 positive regulation of myelination | GO:0097264 self proteolysis | GO:2000543 positive regulation of gastrulation | GO:0001702 gastrulation with mouth forming second | GO:0060912 cardiac cell fate specification | GO:0032289 central nervous system myelin formation | GO:0007165 signal transduction | GO:0048714 positive regulation of oligodendrocyte differe…	GO:0042803 protein homodimerization activity	GO:0043005 neuron projection | GO:0005887 integral component of plasma membrane | GO:0005737 cytoplasm | GO:0005634 nucleus	PF06484.9 Ten_N	IPR000742 EGF-like domain | IPR006530 YD repeat | IPR008969 Carboxypeptidase-like, regulatory domain | IPR009471 Teneurin intracellular, N-terminal | IPR011042 Six-bladed beta-propeller, TolB-like | IPR013032 EGF-like, conserved site | IPR013111 EGF-like domain, extracellular | IPR022385 Rhs repeat-associated core | IPR027691 Teneurin-4 | IPR028916 Tox-GHH domain | IPR031325 RHS repeat
ENSMUSG00000028861	262	49	-2.37138	Down	0.000339874	ENSMUST00000030675;ENSMUST00000138739;ENSMUST00000124614	Mrps15	protein_coding	mitochondrial ribosomal protein S15 [Source:MGI Symbol;Acc:MGI:1913657]	ENSMUSP00000030675	gi|48526512|ref|NP_079820.2|	28S ribosomal protein S15, mitochondrial precursor [Mus musculus] >gi|13959567|sp|Q9DC71.2|RT15_MOUSE RecName: Full=28S ribosomal protein S15, mitochondrial; Short=MRP-S15; Short=S15mt; Flags: Precursor >gi|13620895|dbj|BAB41000.1| mitochondrial ribosomal protein S15 [Mus musculus] >gi|22137402|gb|AAH29193.1| Mitochondrial ribosomal protein S15 [Mus musculus] >gi|148698366|gb|EDL30313.1| mitochon…	sp|Q9DC71|RT15_MOUSE	28S ribosomal protein S15, mitochondrial OS=Mus musculus GN=Mrps15 PE=1 SV=2	COG0184	56.2	Translation, ribosomal structure and biogenesis ;	Ribosomal protein S15P/S13E	mmu:66407	Mrps15, 1500003E24Rik, 2410002B11Rik, Mprs15; mitochondrial ribosomal protein S15; K02956 small subunit ribosomal protein S15	GO:0032543 mitochondrial translation	GO:0003735 structural constituent of ribosome | GO:0044822 poly(A) RNA binding	GO:0031965 nuclear membrane | GO:0005763 mitochondrial small ribosomal subunit	PF00312.19 Ribosomal_S15	--
ENSMUSG00000069270	4219	866	-2.23988	Down	0.000113625	ENSMUST00000171127	H2ac6	protein_coding	H2A clustered histone 6 [Source:MGI Symbol;Acc:MGI:2448287]	ENSMUSP00000127684	gi|655839886|ref|XP_002714260.2|	PREDICTED: histone H2A type 1-like [Oryctolagus cuniculus]	sp|P04908|H2A1B_HUMAN	Histone H2A type 1-B/E OS=Homo sapiens GN=HIST1H2AB PE=1 SV=2	COG5262	197	Chromatin structure and dynamics ;	Histone H2A	cfr:106729279	histone H2A type 1; K11251 histone H2A	GO:0008285 negative regulation of cell proliferation | GO:0006342 chromatin silencing	GO:0019899 enzyme binding | GO:0003677 DNA binding | GO:0046982 protein heterodimerization activity	GO:0000786 nucleosome | GO:0000790 nuclear chromatin | GO:0070062 extracellular exosome	PF00125.21 Histone	IPR002119 Histone H2A | IPR007125 Histone H2A/H2B/H3 | IPR009072 Histone-fold | IPR032454 Histone H2A, C-terminal domain | IPR032458 Histone H2A conserved site
ENSMUSG00000069919	0	27	7.78383	Up	0.000653128	ENSMUST00000093209;ENSMUST00000142555	Hba-a1	protein_coding	hemoglobin alpha, adult chain 1 [Source:MGI Symbol;Acc:MGI:96015]	ENSMUSP00000090897	gi|145301549|ref|NP_001077424.1|	hemoglobin alpha, adult chain 2 [Mus musculus] >gi|145301578|ref|NP_032244.2| hemoglobin subunit alpha [Mus musculus] >gi|16973680|gb|AAL32371.1| alpha globin 1 [Mus musculus] >gi|16973681|gb|AAL32372.1| alpha globin 2 [Mus musculus] >gi|28175802|gb|AAH43020.1| Hemoglobin alpha, adult chain 1 [Mus musculus] >gi|156148253|gb|ABU54054.1| alpha-globin [Mus musculus]	sp|P01942|HBA_MOUSE	Hemoglobin subunit alpha OS=Mus musculus GN=Hba PE=1 SV=2	--	--	--	--	mmu:15122	Hba-a1, Hba, Hba1, Hbat1; hemoglobin alpha, adult chain 1; K13822 hemoglobin subunit alpha	GO:0048821 erythrocyte development | GO:0001701 in utero embryonic development	GO:0004601 peroxidase activity | GO:0019825 oxygen binding | GO:0031720 haptoglobin binding | GO:0020037 heme binding | GO:0043177 organic acid binding	GO:0070062 extracellular exosome | GO:0022627 cytosolic small ribosomal subunit | GO:0072562 blood microparticle | GO:0031838 haptoglobin-hemoglobin complex | GO:0016020 membrane | GO:0005833 hemoglobin complex	PF00042.19 Globin	IPR000971 Globin | IPR002338 Haemoglobin, alpha | IPR002339 Haemoglobin, pi | IPR009050 Globin-like | IPR012292 Globin/Protoglobin
ENSMUSG00000030653	17	0	-7.07616	Down	0.0183814	ENSMUST00000084894	Gm45837	protein_coding	predicted gene 45837 [Source:MGI Symbol;Acc:MGI:5804952]	ENSMUSP00000081956	gi|148684567|gb|EDL16514.1|	phosphodiesterase 2A, cGMP-stimulated, isoform CRA_c, partial [Mus musculus]	sp|Q922S4|PDE2A_MOUSE	cGMP-dependent 3',5'-cyclic phosphodiesterase OS=Mus musculus GN=Pde2a PE=1 SV=3	--	--	--	--	mmu:207728	Pde2a, CGS-PDE, cGSPDE; phosphodiesterase 2A, cGMP-stimulated; K18283 cGMP-dependent 3',5'-cyclic phosphodiesterase [EC:3.1.4.17]	GO:0019933 cAMP-mediated signaling | GO:0061028 establishment of endothelial barrier | GO:0071321 cellular response to cGMP | GO:0019934 cGMP-mediated signaling | GO:0043116 negative regulation of vascular permeability | GO:0006626 protein targeting to mitochondrion | GO:0030818 negative regulation of cAMP biosynthetic process | GO:0036006 cellular response to macrophage colony-stimulating factor…	GO:0004118 cGMP-stimulated cyclic-nucleotide phosphodiesterase activity | GO:0042803 protein homodimerization activity | GO:0030552 cAMP binding | GO:0046872 metal ion binding | GO:0008144 drug binding | GO:0030553 cGMP binding | GO:0030911 TPR domain binding | GO:0036004 GAF domain binding	GO:0005783 endoplasmic reticulum | GO:0005829 cytosol | GO:0005759 mitochondrial matrix | GO:0042734 presynaptic membrane | GO:0045121 membrane raft | GO:0048471 perinuclear region of cytoplasm | GO:0005794 Golgi apparatus | GO:0030425 dendrite | GO:0097457 hippocampal mossy fiber | GO:0005634 nucleus	PF13185.3 GAF_2	IPR002073 3'5'-cyclic nucleotide phosphodiesterase, catalytic domain | IPR003018 GAF domain | IPR003607 HD/PDEase domain | IPR023088 3'5'-cyclic nucleotide phosphodiesterase | IPR023174 3'5'-cyclic nucleotide phosphodiesterase, conserved site | IPR029016 GAF domain-like
ENSMUSG00000041559	0	34	8.11506	Up	6.63361e-05	ENSMUST00000048183;ENSMUST00000162779	Fmod	protein_coding	fibromodulin [Source:MGI Symbol;Acc:MGI:1328364]	ENSMUSP00000035489,ENSMUSP00000124896	gi|10946680|ref|NP_067330.1|	fibromodulin precursor [Mus musculus] >gi|1706876|sp|P50608.1|FMOD_MOUSE RecName: Full=Fibromodulin; Short=FM; AltName: Full=Collagen-binding 59 kDa protein; AltName: Full=Keratan sulfate proteoglycan fibromodulin; Short=KSPG fibromodulin; Flags: Precursor >gi|1160194|emb|CAA64454.1| fibromodulin [Mus musculus] >gi|40555842|gb|AAH64779.1| Fibromodulin [Mus musculus] >gi|148707684|gb|EDL39631.1| f…	sp|P50608|FMOD_MOUSE	Fibromodulin OS=Mus musculus GN=Fmod PE=2 SV=1	COG4886	87.8	Function unknown ;	Leucine-rich repeat (LRR) protein	mmu:14264	Fmod, AI131919, AU041740, SLRR2E; fibromodulin; K08121 fibromodulin	GO:0042060 wound healing | GO:0042476 odontogenesis | GO:0050770 regulation of axonogenesis | GO:0035385 Roundabout signaling pathway | GO:0030199 collagen fibril organization | GO:0048846 axon extension involved in axon guidance	GO:0048495 Roundabout binding | GO:0008201 heparin binding	GO:0005622 intracellular | GO:0005615 extracellular space | GO:0005578 proteinaceous extracellular matrix	PF01462.15 LRRNT	IPR000372 Leucine-rich repeat N-terminal domain | IPR001611 Leucine-rich repeat | IPR003591 Leucine-rich repeat, typical subtype | IPR027215 Fibromodulin | IPR032675 Leucine-rich repeat domain, L domain-like
ENSMUSG00000031762	915	107	-3.05029	Down	5.45827e-08	ENSMUST00000034214;ENSMUST00000212806	Mt2	protein_coding	metallothionein 2 [Source:MGI Symbol;Acc:MGI:97172]	ENSMUSP00000034214,ENSMUSP00000148308	gi|148679170|gb|EDL11117.1|	metallothionein 2, partial [Mus musculus]	--	--	--	--	--	--	--	--	GO:0051970 negative regulation of transmission of nerve impulse | GO:0098908 regulation of neuronal action potential | GO:0043524 negative regulation of neuron apoptotic process | GO:1902260 negative regulation of delayed rectifier potassium channel activity | GO:0051481 negative regulation of cytosolic calcium ion concentration | GO:0010273 detoxification of copper ion | GO:0046676 negative regu…	GO:0046870 cadmium ion binding | GO:0008144 drug binding | GO:0008502 melatonin receptor activity | GO:0008270 zinc ion binding	GO:0005887 integral component of plasma membrane | GO:0005829 cytosol | GO:0048471 perinuclear region of cytoplasm | GO:0005634 nucleus	--	--
ENSMUSG00000110195	2	34	4.04832	Up	0.002405	ENSMUST00000163751;ENSMUST00000211368;ENSMUST00000166652;ENSMUST00000210364;ENSMUST00000209537;ENSMUST00000210092;ENSMUST00000209695;ENSMUST00000211051;ENSMUST00000210100;ENSMUST00000210535;ENSMUST00000210348;ENSMUST00000209315	Pde2a	protein_coding	phosphodiesterase 2A, cGMP-stimulated [Source:MGI Symbol;Acc:MGI:2446107]	ENSMUSP00000131553,ENSMUSP00000147847,ENSMUSP00000148212,ENSMUSP00000147553,ENSMUSP00000147884,ENSMUSP00000127521	gi|344217719|ref|NP_001230687.1|	cGMP-dependent 3',5'-cyclic phosphodiesterase isoform 5 [Mus musculus]	sp|Q01062|PDE2A_RAT	cGMP-dependent 3',5'-cyclic phosphodiesterase OS=Rattus norvegicus GN=Pde2a PE=1 SV=2	--	--	--	--	mmu:207728	Pde2a, CGS-PDE, cGSPDE; phosphodiesterase 2A, cGMP-stimulated; K18283 cGMP-dependent 3',5'-cyclic phosphodiesterase [EC:3.1.4.17]	GO:0019933 cAMP-mediated signaling | GO:0061028 establishment of endothelial barrier | GO:0071321 cellular response to cGMP | GO:0019934 cGMP-mediated signaling | GO:0043116 negative regulation of vascular permeability | GO:0006626 protein targeting to mitochondrion | GO:0030818 negative regulation of cAMP biosynthetic process | GO:0036006 cellular response to macrophage colony-stimulating factor…	GO:0004118 cGMP-stimulated cyclic-nucleotide phosphodiesterase activity | GO:0042803 protein homodimerization activity | GO:0030552 cAMP binding | GO:0046872 metal ion binding | GO:0008144 drug binding | GO:0030553 cGMP binding | GO:0030911 TPR domain binding | GO:0036004 GAF domain binding	GO:0005783 endoplasmic reticulum | GO:0005829 cytosol | GO:0005759 mitochondrial matrix | GO:0042734 presynaptic membrane | GO:0045121 membrane raft | GO:0048471 perinuclear region of cytoplasm | GO:0005794 Golgi apparatus | GO:0030425 dendrite | GO:0097457 hippocampal mossy fiber | GO:0005634 nucleus	PF13185.3 GAF_2	IPR002073 3'5'-cyclic nucleotide phosphodiesterase, catalytic domain | IPR003018 GAF domain | IPR003607 HD/PDEase domain | IPR023088 3'5'-cyclic nucleotide phosphodiesterase | IPR023174 3'5'-cyclic nucleotide phosphodiesterase, conserved site | IPR029016 GAF domain-like
ENSMUSG00000064370	762	119	-2.63316	Down	4.87827e-06	ENSMUST00000082421	mt-Cytb	protein_coding	mitochondrially encoded cytochrome b [Source:MGI Symbol;Acc:MGI:102501]	ENSMUSP00000081003	gi|4379193|emb|CAA24092.1|	unnamed protein product [Mus musculus]	sp|P00158|CYB_MOUSE	Cytochrome b OS=Mus musculus GN=Mt-Cyb PE=1 SV=1	COG1290	416	Energy production and conversion ;	Cytochrome b subunit of the bc complex	mmu:17711	CYTB; cytochrome b; K00412 ubiquinol-cytochrome c reductase cytochrome b subunit	GO:0046689 response to mercury ion | GO:0051592 response to calcium ion | GO:0042538 hyperosmotic salinity response | GO:0033762 response to glucagon | GO:0046686 response to cadmium ion | GO:1902600 hydrogen ion transmembrane transport | GO:0006122 mitochondrial electron transport, ubiquinol to cytochrome c	GO:0009055 electron carrier activity | GO:0046872 metal ion binding | GO:0008121 ubiquinol-cytochrome-c reductase activity | GO:0032403 protein complex binding	GO:0045275 respiratory chain complex III | GO:0005743 mitochondrial inner membrane	PF00033.16 Cytochrome_B	--
ENSMUSG00000068614	0	52	8.72623	Up	2.85611e-07	ENSMUST00000090269;ENSMUST00000149125	Actc1	protein_coding	actin, alpha, cardiac muscle 1 [Source:MGI Symbol;Acc:MGI:87905]	ENSMUSP00000087736,ENSMUSP00000123370	gi|637243920|ref|XP_003214525.2|	PREDICTED: actin, alpha cardiac muscle 1 [Anolis carolinensis]	sp|P68035|ACTC_RAT	Actin, alpha cardiac muscle 1 OS=Rattus norvegicus GN=Actc1 PE=2 SV=1	COG5277	710	Cytoskeleton ;	Actin and related proteins	amj:106736711	ACTC1, ACTC; actin, alpha, cardiac muscle 1; K12314 actin, alpha cardiac muscle	GO:0010628 positive regulation of gene expression | GO:0043066 negative regulation of apoptotic process | GO:0045471 response to ethanol | GO:0060048 cardiac muscle contraction | GO:0055003 cardiac myofibril assembly | GO:0030049 muscle filament sliding | GO:0090131 mesenchyme migration | GO:0030240 skeletal muscle thin filament assembly | GO:0055008 cardiac muscle tissue morphogenesis | GO:00424…	GO:0017022 myosin binding | GO:0016887 ATPase activity | GO:0005524 ATP binding	GO:0005925 focal adhesion | GO:0072562 blood microparticle | GO:0030027 lamellipodium | GO:0016020 membrane | GO:0030175 filopodium | GO:0044297 cell body | GO:0005829 cytosol | GO:0031674 I band | GO:0042643 actomyosin, actin portion | GO:0070062 extracellular exosome	PF00022.16 Actin	IPR004000 Actin family | IPR004001 Actin, conserved site | IPR020902 Actin/actin-like conserved site
ENSMUSG00000025359	50	8	-2.58107	Down	0.0136685	ENSMUST00000217836;ENSMUST00000219157;ENSMUST00000054125	Pmel	protein_coding	premelanosome protein [Source:MGI Symbol;Acc:MGI:98301]	ENSMUSP00000151602,ENSMUSP00000151621,ENSMUSP00000051869	gi|31981217|ref|NP_068682.2|	melanocyte protein PMEL precursor [Mus musculus] >gi|52221178|gb|AAH82555.1| Silver [Mus musculus] >gi|148692654|gb|EDL24601.1| silver, isoform CRA_a [Mus musculus] >gi|148692655|gb|EDL24602.1| silver, isoform CRA_a [Mus musculus]	sp|Q60696|PMEL_MOUSE	Melanocyte protein PMEL OS=Mus musculus GN=Pmel PE=1 SV=1	--	--	--	--	mmu:20431	Pmel, D10H12S53E, D12S53Eh, Pmel17, Si, Silv, gp100, gp87; premelanosome protein; K17304 melanocyte protein PMEL	GO:0032438 melanosome organization | GO:0048023 positive regulation of melanin biosynthetic process	--	GO:0016021 integral component of membrane | GO:0042470 melanosome | GO:0032585 multivesicular body membrane | GO:0005576 extracellular region | GO:0005789 endoplasmic reticulum membrane | GO:0005794 Golgi apparatus	PF00801.17 PKD	IPR000601 PKD domain | IPR022409 PKD/Chitinase domain
ENSMUSG00000039462	38	744	4.33108	Up	4.35944e-14	ENSMUST00000105511	Col10a1	protein_coding	collagen, type X, alpha 1 [Source:MGI Symbol;Acc:MGI:88445]	ENSMUSP00000101150	gi|6753480|ref|NP_034055.1|	collagen alpha-1(X) chain precursor [Mus musculus] >gi|1168725|sp|Q05306.1|COAA1_MOUSE RecName: Full=Collagen alpha-1(X) chain; Flags: Precursor >gi|50481|emb|CAA47763.1| alpha 1 (X) collagen chain [Mus musculus] >gi|148672943|gb|EDL04890.1| procollagen, type X, alpha 1 [Mus musculus]	sp|Q05306|COAA1_MOUSE	Collagen alpha-1(X) chain OS=Mus musculus GN=Col10a1 PE=2 SV=1	--	--	--	--	mmu:12813	Col10a1, Col10, Col10a-1; collagen, type X, alpha 1; K19479 collagen, type X, alpha	--	--	GO:0005938 cell cortex | GO:0005578 proteinaceous extracellular matrix | GO:0005581 collagen trimer	PF01391.15 Collagen	IPR001073 C1q domain | IPR008160 Collagen triple helix repeat | IPR008983 Tumour necrosis factor-like domain
ENSMUSG00000054428	906	244	-1.84769	Down	0.00542559	ENSMUST00000152993;ENSMUST00000067496;ENSMUST00000145795	Atpif1	protein_coding	ATPase inhibitory factor 1 [Source:MGI Symbol;Acc:MGI:1196457]	ENSMUSP00000133099,ENSMUSP00000064282	gi|2367441|gb|AAB69647.1|	ATPase inhibitor [Mus musculus]	sp|O35143|ATIF1_MOUSE	ATPase inhibitor, mitochondrial OS=Mus musculus GN=Atpif1 PE=1 SV=2	--	--	--	--	--	--	GO:1903052 positive regulation of proteolysis involved in cellular protein catabolic process | GO:0051289 protein homotetramerization | GO:0032780 negative regulation of ATPase activity | GO:0098779 mitophagy in response to mitochondrial depolarization | GO:0072593 reactive oxygen species metabolic process | GO:1903578 regulation of ATP metabolic process | GO:0001937 negative regulation of endoth…	GO:0042803 protein homodimerization activity | GO:0051117 ATPase binding | GO:0030272 5-formyltetrahydrofolate cyclo-ligase activity | GO:0042030 ATPase inhibitor activity | GO:0005516 calmodulin binding | GO:0043532 angiostatin binding	GO:0009986 cell surface | GO:0005753 mitochondrial proton-transporting ATP synthase complex	PF04568.9 IATP	IPR007648 Mitochondrial ATPase inhibitor
ENSMUSG00000010406	1270	187	-2.7185	Down	1.17436e-06	ENSMUST00000010550;ENSMUST00000228871;ENSMUST00000199153;ENSMUST00000200217;ENSMUST00000199195;ENSMUST00000199689;ENSMUST00000196273	Mrpl52	protein_coding	mitochondrial ribosomal protein L52 [Source:MGI Symbol;Acc:MGI:1916086]	ENSMUSP00000010550,ENSMUSP00000142555,ENSMUSP00000142643	gi|30348981|ref|NP_081127.1|	39S ribosomal protein L52, mitochondrial precursor [Mus musculus] >gi|81881179|sp|Q9D0Y8.1|RM52_MOUSE RecName: Full=39S ribosomal protein L52, mitochondrial; Short=L52mt; Short=MRP-L52; Flags: Precursor >gi|148704406|gb|EDL36353.1| mitochondrial ribosomal protein L52, isoform CRA_d [Mus musculus]	sp|Q9D0Y8|RM52_MOUSE	39S ribosomal protein L52, mitochondrial OS=Mus musculus GN=Mrpl52 PE=1 SV=1	--	--	--	--	mmu:68836	Mrpl52, 1110047B07Rik; mitochondrial ribosomal protein L52; K17433 large subunit ribosomal protein L52	--	--	GO:0005840 ribosome | GO:0005739 mitochondrion	--	--
ENSMUSG00000035295	20	0	-7.30902	Down	0.00670455	ENSMUST00000039535;ENSMUST00000112872;ENSMUST00000124062	Wdr38	protein_coding	WD repeat domain 38 [Source:MGI Symbol;Acc:MGI:1923896]	ENSMUSP00000043834,ENSMUSP00000108493	gi|58037455|ref|NP_083963.1|	WD repeat-containing protein 38 [Mus musculus] >gi|81917126|sp|Q9D994.1|WDR38_MOUSE RecName: Full=WD repeat-containing protein 38 >gi|115528885|gb|AAI15630.1| Wdr38 protein [Mus musculus]	sp|Q9D994|WDR38_MOUSE	WD repeat-containing protein 38 OS=Mus musculus GN=Wdr38 PE=2 SV=1	COG2319	182	General function prediction only ;	FOG: WD40 repeat	--	--	GO:0002244 hematopoietic progenitor cell differentiation	--	--	PF00400.29 WD40	IPR001680 WD40 repeat | IPR015943 WD40/YVTN repeat-like-containing domain | IPR017986 WD40-repeat-containing domain | IPR019775 WD40 repeat, conserved site | IPR020472 G-protein beta WD-40 repeat
ENSMUSG00000023886	652	9385	3.89157	Up	1.56042e-13	ENSMUST00000024660;ENSMUST00000233344;ENSMUST00000233540;ENSMUST00000232923;ENSMUST00000233526;ENSMUST00000232936;ENSMUST00000233686	Smoc2	protein_coding	SPARC related modular calcium binding 2 [Source:MGI Symbol;Acc:MGI:1929881]	ENSMUSP00000024660,ENSMUSP00000156572,ENSMUSP00000156632	gi|569001325|ref|XP_006524840.1|	PREDICTED: SPARC-related modular calcium-binding protein 2 isoform X1 [Mus musculus]	sp|Q8CD91|SMOC2_MOUSE	SPARC-related modular calcium-binding protein 2 OS=Mus musculus GN=Smoc2 PE=1 SV=1	--	--	--	--	adf:107342837	uncharacterized LOC107342837; K10809 thyroglobulin	GO:0010811 positive regulation of cell-substrate adhesion | GO:0007165 signal transduction | GO:0030198 extracellular matrix organization	GO:0008201 heparin binding | GO:0005509 calcium ion binding	GO:0005614 interstitial matrix | GO:0005604 basement membrane	PF07648.12 Kazal_2	IPR000716 Thyroglobulin type-1 | IPR002048 EF-hand domain | IPR002350 Kazal domain | IPR011992 EF-hand domain pair | IPR018247 EF-Hand 1, calcium-binding site | IPR019577 SPARC/Testican, calcium-binding domain
ENSMUSG00000045573	80	20	-1.94902	Down	0.0382507	ENSMUST00000070375;ENSMUST00000133567	Penk	protein_coding	preproenkephalin [Source:MGI Symbol;Acc:MGI:104629]	ENSMUSP00000066822,ENSMUSP00000122389	gi|50950119|ref|NP_001002927.1|	proenkephalin-A precursor [Mus musculus] >gi|239938678|sp|P22005.2|PENK_MOUSE RecName: Full=Proenkephalin-A; Contains: RecName: Full=Synenkephalin; Contains: RecName: Full=Met-enkephalin; AltName: Full=Opioid growth factor; Short=OGF; Contains: RecName: Full=PENK(114-133); Contains: RecName: Full=PENK(143-184); Contains: RecName: Full=Met-enkephalin-Arg-Ser-Leu; Contains: RecName: Full=Leu-enkeph…	sp|P22005|PENK_MOUSE	Proenkephalin-A OS=Mus musculus GN=Penk PE=1 SV=2	--	--	--	--	mmu:18619	Penk, AI326464, ENK, PPA, Penk1; preproenkephalin; K18832 proenkephalin A	GO:0035094 response to nicotine | GO:0001964 startle response | GO:0032496 response to lipopolysaccharide | GO:0001649 osteoblast differentiation | GO:2000987 positive regulation of behavioral fear response | GO:0007218 neuropeptide signaling pathway | GO:0051867 general adaptation syndrome, behavioral process | GO:0014009 glial cell proliferation | GO:0045471 response to ethanol | GO:0098586 cel…	GO:0001515 opioid peptide activity	GO:0070852 cell body fiber | GO:0032280 symmetric synapse | GO:0043679 axon terminus | GO:0005576 extracellular region | GO:0030425 dendrite | GO:0043204 perikaryon	PF01160.15 Opiods_neuropep	IPR000703 Proenkephalin A | IPR006024 Opioid neuropeptide precursor
ENSMUSG00000021643	124	12	-3.31157	Down	5.44591e-06	ENSMUST00000022145;ENSMUST00000132053;ENSMUST00000129014;ENSMUST00000151821;ENSMUST00000152286	Serf1	protein_coding	small EDRK-rich factor 1 [Source:MGI Symbol;Acc:MGI:1337114]	ENSMUSP00000022145,ENSMUSP00000121609,ENSMUSP00000121421,ENSMUSP00000119853,ENSMUSP00000119193	gi|6755470|ref|NP_035483.1|	small EDRK-rich factor 1 [Mus musculus] >gi|23396843|sp|O88892.1|SERF1_MOUSE RecName: Full=Small EDRK-rich factor 1; AltName: Full=Protein 4F5; Short=m4F5 >gi|5932002|gb|AAD56758.1|AF131205_2 Serf1 protein [Mus musculus] >gi|3641534|gb|AAC63514.1| small EDRK-rich factor 1 [Mus musculus] >gi|20307000|gb|AAH28510.1| Small EDRK-rich factor 1 [Mus musculus] >gi|148668501|gb|EDL00820.1| small EDRK-ric…	sp|O88892|SERF1_MOUSE	Small EDRK-rich factor 1 OS=Mus musculus GN=Serf1 PE=3 SV=1	--	--	--	--	--	--	--	--	--	PF04419.11 4F5	IPR007513 Uncharacterised protein family SERF
ENSMUSG00000037085	36	5	-2.77358	Down	0.0235257	ENSMUST00000036937	Trmt12	protein_coding	tRNA methyltranferase 12 [Source:MGI Symbol;Acc:MGI:1915510]	ENSMUSP00000047831	gi|118150645|ref|NP_080918.2|	tRNA wybutosine-synthesizing protein 2 homolog [Mus musculus] >gi|81895986|sp|Q8BG71.1|TYW2_MOUSE RecName: Full=tRNA wybutosine-synthesizing protein 2 homolog; Short=tRNA-yW-synthesizing protein 2; AltName: Full=tRNA(Phe) (4-demethylwyosine(37)-C(7)) aminocarboxypropyltransferase >gi|148697363|gb|EDL29310.1| mCG51593 [Mus musculus]	sp|Q8BG71|TYW2_MOUSE	tRNA wybutosine-synthesizing protein 2 homolog OS=Mus musculus GN=Trmt12 PE=2 SV=1	COG2520	125	General function prediction only ;	Predicted methyltransferase	mmu:68260	Trmt12, 4632406N01Rik, AI449275, Tyw2; tRNA methyltranferase 12; K07055 tRNA wybutosine-synthesizing protein 2 [EC:2.5.1.114]	GO:0008033 tRNA processing	GO:0016740 transferase activity	--	PF02475.13 Met_10	IPR029063 S-adenosyl-L-methionine-dependent methyltransferase | IPR030382 SAM-dependent methyltransferase TRM5/TYW2-type
ENSMUSG00000040026	16744	2780	-2.54602	Down	3.74384e-06	ENSMUST00000006956;ENSMUST00000211660;ENSMUST00000210913	Saa3	protein_coding	serum amyloid A 3 [Source:MGI Symbol;Acc:MGI:98223]	ENSMUSP00000006956,ENSMUSP00000148151	gi|6755396|ref|NP_035445.1|	serum amyloid A-3 protein precursor [Mus musculus] >gi|134162|sp|P04918.1|SAA3_MOUSE RecName: Full=Serum amyloid A-3 protein; Flags: Precursor >gi|762988|emb|CAA27219.1| SAA3 [Mus musculus] >gi|33585575|gb|AAH55885.1| Serum amyloid A 3 [Mus musculus] >gi|148690989|gb|EDL22936.1| serum amyloid A 3, isoform CRA_b [Mus musculus]	sp|P04918|SAA3_MOUSE	Serum amyloid A-3 protein OS=Mus musculus GN=Saa3 PE=1 SV=1	--	--	--	--	mmu:20210	Saa3, AV098916, Saa-3, l7R3; serum amyloid A 3; K17310 serum amyloid A protein	GO:0060326 cell chemotaxis | GO:0007252 I-kappaB phosphorylation | GO:0006953 acute-phase response | GO:0071347 cellular response to interleukin-1	GO:0042056 chemoattractant activity | GO:0035662 Toll-like receptor 4 binding	GO:0034364 high-density lipoprotein particle	PF00277.15 SAA	IPR000096 Serum amyloid A protein
ENSMUSG00000030795	1032	295	-1.76182	Down	0.00909669	ENSMUST00000106251;ENSMUST00000077609;ENSMUST00000137464;ENSMUST00000174196;ENSMUST00000128851;ENSMUST00000121616;ENSMUST00000123151;ENSMUST00000154843;ENSMUST00000155941;ENSMUST00000205261;ENSMUST00000136289;ENSMUST00000174632;ENSMUST00000205351;ENSMUST00000141997;ENSMUST00000172755;ENSMUST00000079045	Fus	protein_coding	fused in sarcoma [Source:MGI Symbol;Acc:MGI:1353633]	ENSMUSP00000101858,ENSMUSP00000076801,ENSMUSP00000112721,ENSMUSP00000133820,ENSMUSP00000134447,ENSMUSP00000078054	gi|148685673|gb|EDL17620.1|	fusion, derived from t(12;16) malignant liposarcoma (human), isoform CRA_f, partial [Mus musculus]	sp|P56959|FUS_MOUSE	RNA-binding protein FUS OS=Mus musculus GN=Fus PE=1 SV=1	--	--	--	--	mmu:233908	Fus, D430004D17Rik, D930039C12Rik, Fus1, Tls; fused in sarcoma; K13098 RNA-binding protein FUS	GO:0071277 cellular response to calcium ion	GO:0030331 estrogen receptor binding | GO:0008270 zinc ion binding | GO:0003676 nucleic acid binding | GO:0035255 ionotropic glutamate receptor binding | GO:0031489 myosin V binding | GO:0046965 retinoid X receptor binding | GO:0000166 nucleotide binding | GO:0046966 thyroid hormone receptor binding	GO:0044327 dendritic spine head | GO:0005844 polysome | GO:0048471 perinuclear region of cytoplasm | GO:0005634 nucleus | GO:0043204 perikaryon	PF00076.19 RRM_1	IPR000504 RNA recognition motif domain | IPR001876 Zinc finger, RanBP2-type | IPR012677 Nucleotide-binding alpha-beta plait domain
ENSMUSG00000031004	3041	880	-1.74441	Down	0.00856835	ENSMUST00000033310;ENSMUST00000211238	Mki67	protein_coding	antigen identified by monoclonal antibody Ki 67 [Source:MGI Symbol;Acc:MGI:106035]	ENSMUSP00000033310,ENSMUSP00000147271	gi|169234624|ref|NP_001074586.2|	antigen KI-67 [Mus musculus]	sp|P46013|KI67_HUMAN	Antigen KI-67 OS=Homo sapiens GN=MKI67 PE=1 SV=2	--	--	--	--	mmu:17345	Mki67, D630048A14Rik, Ki-67, Ki67; antigen identified by monoclonal antibody Ki 67; K17582 antigen KI-67	GO:0072574 hepatocyte proliferation | GO:1990705 cholangiocyte proliferation | GO:0007126 meiotic nuclear division	GO:0008022 protein C-terminus binding | GO:0044822 poly(A) RNA binding	GO:0005730 nucleolus | GO:0000775 chromosome, centromeric region | GO:0000793 condensed chromosome | GO:0005737 cytoplasm | GO:0016020 membrane	PF00498.23 FHA	IPR000253 Forkhead-associated (FHA) domain | IPR008984 SMAD/FHA domain | IPR012568 K167R | IPR029334 Protein phosphatase 1 binding domain
ENSMUSG00000027533	982	2739	1.52415	Up	0.0372705	ENSMUST00000029046;ENSMUST00000123744	Fabp5	protein_coding	fatty acid binding protein 5, epidermal [Source:MGI Symbol;Acc:MGI:101790]	ENSMUSP00000029046	gi|529280791|pdb|4AZP|A	Chain A, Murine Epidermal Fatty Acid-binding Protein (fabp5) In Complex With The Endocannabinoid Anandamide	sp|Q05816|FABP5_MOUSE	Fatty acid-binding protein, epidermal OS=Mus musculus GN=Fabp5 PE=1 SV=3	--	--	--	--	mmu:16592	Fabp5, E-FABP, Fabpe, Klbp, PA-FABP, mal1; fatty acid binding protein 5, epidermal; K08754 fatty acid-binding protein 5, epidermal	GO:0006656 phosphatidylcholine biosynthetic process | GO:0015758 glucose transport | GO:0006006 glucose metabolic process	GO:0005215 transporter activity | GO:0005504 fatty acid binding	GO:0070062 extracellular exosome | GO:0005737 cytoplasm	PF00061.20 Lipocalin	IPR000463 Cytosolic fatty-acid binding | IPR000566 Lipocalin/cytosolic fatty-acid binding domain | IPR011038 Calycin-like | IPR012674 Calycin | IPR031259 Intracellular lipid binding protein
ENSMUSG00000073486	20	1	-4.11918	Down	0.0316519	ENSMUST00000097454	Gm10518	protein_coding	predicted gene 10518 [Source:MGI Symbol;Acc:MGI:3704205]	--	--	--	--	--	--	--	--	--	--	--	--	--	--	--	--
ENSMUSG00000043219	55	10	-2.40069	Down	0.0183814	ENSMUST00000062829	Hoxa6	protein_coding	homeobox A6 [Source:MGI Symbol;Acc:MGI:96178]	ENSMUSP00000058755	gi|27544943|ref|NP_034584.1|	homeobox protein Hox-A6 [Mus musculus] >gi|20141492|sp|P09092.2|HXA6_MOUSE RecName: Full=Homeobox protein Hox-A6; AltName: Full=Homeobox protein Hox-1.2; AltName: Full=Homeobox protein M5-4 >gi|9716486|gb|AAF97512.1|AF247663_1 homeodomain protein Hoxa 6 [Mus musculus] >gi|111599973|gb|AAI19106.1| Homeo box A6 [Mus musculus] >gi|111601101|gb|AAI19108.1| Homeo box A6 [Mus musculus] >gi|148666243|gb…	sp|P09092|HXA6_MOUSE	Homeobox protein Hox-A6 OS=Mus musculus GN=Hoxa6 PE=3 SV=2	--	--	--	--	mmu:15403	Hoxa6, Hox-1.2; homeobox A6; K09306 homeobox protein HoxA/B/C6	GO:0048704 embryonic skeletal system morphogenesis | GO:0009952 anterior/posterior pattern specification | GO:0006355 regulation of transcription, DNA-templated	GO:0043565 sequence-specific DNA binding | GO:0003700 transcription factor activity, sequence-specific DNA binding	GO:0005634 nucleus	PF00046.26 Homeobox	IPR001356 Homeobox domain | IPR001827 Homeobox protein, antennapedia type, conserved site | IPR009057 Homeodomain-like | IPR017970 Homeobox, conserved site | IPR017995 Homeobox protein, antennapedia type | IPR020479 Homeodomain, metazoa
ENSMUSG00000057863	19400	1927	-3.28713	Down	5.03144e-10	ENSMUST00000080492	Rpl36	protein_coding	ribosomal protein L36 [Source:MGI Symbol;Acc:MGI:1860603]	ENSMUSP00000079340	gi|148706231|gb|EDL38178.1|	mCG5564, partial [Mus musculus]	sp|Q9Y3U8|RL36_HUMAN	60S ribosomal protein L36 OS=Homo sapiens GN=RPL36 PE=1 SV=3	COG5051	101	Translation, ribosomal structure and biogenesis ;	Ribosomal protein L36E	pale:102898798	RPL36; ribosomal protein L36; K02920 large subunit ribosomal protein L36e	GO:0000184 nuclear-transcribed mRNA catabolic process, nonsense-mediated decay | GO:0006415 translational termination | GO:0006413 translational initiation | GO:0002181 cytoplasmic translation | GO:0016259 selenocysteine metabolic process | GO:0006414 translational elongation | GO:0019083 viral transcription | GO:0006614 SRP-dependent cotranslational protein targeting to membrane | GO:0006364 rRN…	GO:0005515 protein binding | GO:0044822 poly(A) RNA binding | GO:0003735 structural constituent of ribosome	GO:0016020 membrane | GO:0022625 cytosolic large ribosomal subunit | GO:0005730 nucleolus	PF01158.15 Ribosomal_L36e	IPR000509 Ribosomal protein L36e
ENSMUSG00000116378	17	0	-7.07616	Down	0.0183814	ENSMUST00000171999	Gcat	protein_coding	glycine C-acetyltransferase (2-amino-3-ketobutyrate-coenzyme A ligase) [Source:MGI Symbol;Acc:MGI:1349389]	ENSMUSP00000131649	gi|240120119|ref|NP_001155184.1|	2-amino-3-ketobutyrate coenzyme A ligase, mitochondrial isoform b [Mus musculus]	sp|O88986|KBL_MOUSE	2-amino-3-ketobutyrate coenzyme A ligase, mitochondrial OS=Mus musculus GN=Gcat PE=1 SV=2	COG0156	396	Coenzyme transport and metabolism ;	7-keto-8-aminopelargonate synthetase and related enzymes	mmu:26912	Gcat, AI526977, Kbl; glycine C-acetyltransferase (2-amino-3-ketobutyrate-coenzyme A ligase); K00639 glycine C-acetyltransferase [EC:2.3.1.29]	GO:0009058 biosynthetic process | GO:0006567 threonine catabolic process	GO:0008890 glycine C-acetyltransferase activity | GO:0016874 ligase activity | GO:0030170 pyridoxal phosphate binding	GO:0005743 mitochondrial inner membrane | GO:0005654 nucleoplasm	PF00155.18 Aminotran_1_2	IPR001917 Aminotransferase, class-II, pyridoxal-phosphate binding site | IPR004839 Aminotransferase, class I/classII | IPR011282 2-amino-3-ketobutyrate coenzyme A ligase | IPR015421 Pyridoxal phosphate-dependent transferase, major region, subdomain 1 | IPR015422 Pyridoxal phosphate-dependent transferase, major region, subdomain 2 | IPR015424 Pyridoxal phosphate-dependent transferase
ENSMUSG00000042988	242	1185	2.33562	Up	6.63361e-05	ENSMUST00000106177;ENSMUST00000106178;ENSMUST00000055439;ENSMUST00000150458	Notum	protein_coding	notum palmitoleoyl-protein carboxylesterase [Source:MGI Symbol;Acc:MGI:1924833]	ENSMUSP00000101783,ENSMUSP00000101784,ENSMUSP00000122788	gi|148702837|gb|EDL34784.1|	mCG2125 [Mus musculus]	sp|Q8R116|NOTUM_MOUSE	Palmitoleoyl-protein carboxylesterase NOTUM OS=Mus musculus GN=Notum PE=1 SV=2	--	--	--	--	mmu:77583	Notum, 5730593N15Rik; notum pectinacetylesterase homolog (Drosophila); K19882 O-palmitoleoyl-L-serine hydrolase [EC:3.1.1.98]	GO:0006507 GPI anchor release | GO:0030178 negative regulation of Wnt signaling pathway | GO:1990697 protein depalmitoleylation	GO:0080031 methyl salicylate esterase activity | GO:0034892 endosulfan lactone lactonase activity | GO:0018733 3,4-dihydrocoumarin hydrolase activity | GO:0043908 Ser(Gly)-tRNA(Ala) hydrolase activity | GO:0010296 prenylcysteine methylesterase activity | GO:0004620 phospholipase activity | GO:0047376 all-trans-retinyl-palmitate hydrolase, all-trans-retinol forming activity | GO:0043907 Cys-tRNA(P…	GO:0005576 extracellular region	PF03283.10 PAE	IPR004963 Pectinacetylesterase/NOTUM
ENSMUSG00000030432	7820	1498	-2.33962	Down	3.82207e-05	ENSMUST00000032597;ENSMUST00000078432;ENSMUST00000206617;ENSMUST00000126794;ENSMUST00000129888	Rpl28	protein_coding	ribosomal protein L28 [Source:MGI Symbol;Acc:MGI:101839]	ENSMUSP00000032597,ENSMUSP00000104217,ENSMUSP00000117699	gi|674075120|ref|XP_008844880.1|	PREDICTED: 60S ribosomal protein L28 [Nannospalax galili]	sp|P41105|RL28_MOUSE	60S ribosomal protein L28 OS=Mus musculus GN=Rpl28 PE=1 SV=2	--	--	--	--	xla:100505437	uncharacterized LOC100505437; K02903 large subunit ribosomal protein L28e	GO:0006412 translation | GO:1903146 regulation of mitophagy | GO:1903955 positive regulation of protein targeting to mitochondrion	GO:0044822 poly(A) RNA binding | GO:0016787 hydrolase activity | GO:0003735 structural constituent of ribosome	GO:0016020 membrane | GO:0044297 cell body | GO:0022625 cytosolic large ribosomal subunit | GO:0030425 dendrite | GO:0036464 cytoplasmic ribonucleoprotein granule | GO:0070062 extracellular exosome	PF01778.14 Ribosomal_L28e	IPR002672 Ribosomal protein L28e | IPR029004 Ribosomal L28e/Mak16
ENSMUSG00000022840	27	3	-3.07427	Down	0.0366202	ENSMUST00000114913;ENSMUST00000232470	Adcy5	protein_coding	adenylate cyclase 5 [Source:MGI Symbol;Acc:MGI:99673]	ENSMUSP00000110563	gi|148747309|ref|NP_001012783.3|	adenylate cyclase type 5 [Mus musculus] >gi|122065123|sp|P84309.2|ADCY5_MOUSE RecName: Full=Adenylate cyclase type 5; AltName: Full=ATP pyrophosphate-lyase 5; AltName: Full=Adenylate cyclase type V; AltName: Full=Adenylyl cyclase 5	sp|P84309|ADCY5_MOUSE	Adenylate cyclase type 5 OS=Mus musculus GN=Adcy5 PE=1 SV=2	COG2114	149	Signal transduction mechanisms ;	Adenylate cyclase, family 3 (some proteins contain HAMP domain)	mmu:224129	Adcy5, AW121902, Ac5; adenylate cyclase 5; K08045 adenylate cyclase 5 [EC:4.6.1.1]	GO:0061178 regulation of insulin secretion involved in cellular response to glucose stimulus | GO:0019933 cAMP-mediated signaling | GO:0007204 positive regulation of cytosolic calcium ion concentration | GO:0007626 locomotory behavior | GO:0007195 adenylate cyclase-inhibiting dopamine receptor signaling pathway | GO:1904322 cellular response to forskolin | GO:0001973 adenosine receptor signaling …	GO:0008294 calcium- and calmodulin-responsive adenylate cyclase activity | GO:0046982 protein heterodimerization activity | GO:0008179 adenylate cyclase binding | GO:0046872 metal ion binding | GO:0005524 ATP binding | GO:0097110 scaffold protein binding	GO:0045121 membrane raft | GO:0072372 primary cilium | GO:0005829 cytosol | GO:0042383 sarcolemma | GO:0016021 integral component of membrane | GO:0005768 endosome	PF16214.2 AC_N	IPR001054 Adenylyl cyclase class-3/4/guanylyl cyclase | IPR009398 Adenylate cyclase, conserved domain | IPR018297 Adenylyl cyclase class-4/guanylyl cyclase, conserved site | IPR029787 Nucleotide cyclase | IPR030672 Adenylate cyclase | IPR032628 Adenylate cyclase, N-terminal
ENSMUSG00000016252	2305	448	-2.31846	Down	6.22348e-05	ENSMUST00000016396;ENSMUST00000149191;ENSMUST00000153132	Atp5e	protein_coding	ATP synthase, H+ transporting, mitochondrial F1 complex, epsilon subunit [Source:MGI Symbol;Acc:MGI:1855697]	ENSMUSP00000016396	gi|13385484|ref|NP_080259.1|	ATP synthase subunit epsilon, mitochondrial [Mus musculus] >gi|3023355|sp|P56382.2|ATP5E_MOUSE RecName: Full=ATP synthase subunit epsilon, mitochondrial; Short=ATPase subunit epsilon >gi|19353354|gb|AAH24339.1| ATP synthase, H+ transporting, mitochondrial F1 complex, epsilon subunit [Mus musculus] >gi|148674733|gb|EDL06680.1| ATP synthase, H+ transporting, mitochondrial F1 complex, epsilon subuni…	sp|P56382|ATP5E_MOUSE	ATP synthase subunit epsilon, mitochondrial OS=Mus musculus GN=Atp5e PE=1 SV=2	--	--	--	--	mmu:67126	Atp5e, 2410043G19Rik, ATPE, AV000645; ATP synthase, H+ transporting, mitochondrial F1 complex, epsilon subunit; K02135 F-type H+-transporting ATPase subunit epsilon	GO:0015986 ATP synthesis coupled proton transport	GO:0046961 proton-transporting ATPase activity, rotational mechanism | GO:0008553 hydrogen-exporting ATPase activity, phosphorylative mechanism | GO:0046933 proton-transporting ATP synthase activity, rotational mechanism	GO:0000275 mitochondrial proton-transporting ATP synthase complex, catalytic core F(1)	PF04627.10 ATP-synt_Eps	IPR006721 ATPase, F1 complex, epsilon subunit, mitochondrial
ENSMUSG00000084786	258	78	-1.67984	Down	0.0316519	ENSMUST00000154429;ENSMUST00000129414;ENSMUST00000160682;ENSMUST00000161887;ENSMUST00000162303;ENSMUST00000161595;ENSMUST00000161486;ENSMUST00000160874;ENSMUST00000161882;ENSMUST00000160124;ENSMUST00000161834	Ubl5	protein_coding	ubiquitin-like 5 [Source:MGI Symbol;Acc:MGI:1913427]	ENSMUSP00000123971,ENSMUSP00000124672,ENSMUSP00000123843,ENSMUSP00000124812,ENSMUSP00000124506,ENSMUSP00000124405,ENSMUSP00000125540,ENSMUSP00000125364	gi|894216101|ref|NP_001297675.1|	ubiquitin-like protein 5 isoform 1 [Mus musculus]	sp|Q3T0Z3|UBL5_BOVIN	Ubiquitin-like protein 5 OS=Bos taurus GN=UBL5 PE=3 SV=1	--	--	--	--	mmu:66177	Ubl5, 1110030M22Rik, beacon; ubiquitin-like 5; K13113 ubiquitin-like protein 5	GO:0000398 mRNA splicing, via spliceosome | GO:0006464 cellular protein modification process | GO:1903955 positive regulation of protein targeting to mitochondrion	GO:0031386 protein tag | GO:0005515 protein binding	GO:0005737 cytoplasm | GO:0005634 nucleus	--	IPR029071 Ubiquitin-related domain
ENSMUSG00000102748	230	58	-1.94083	Down	0.00782345	ENSMUST00000195112;ENSMUST00000193631	Pcdhgb2	protein_coding	protocadherin gamma subfamily B, 2 [Source:MGI Symbol;Acc:MGI:1935170]	ENSMUSP00000141449	gi|18087735|ref|NP_291053.1|	protocadherin gamma-B2 precursor [Mus musculus] >gi|13876348|gb|AAK26094.1| protocadherin gamma B2 [Mus musculus] >gi|32451631|gb|AAH54557.1| Protocadherin gamma subfamily B, 2 [Mus musculus]	sp|Q5DRA9|PCDGE_PANTR	Protocadherin gamma-B2 OS=Pan troglodytes GN=PCDHGB2 PE=3 SV=1	--	--	--	--	mmu:93700	Pcdhgb2; protocadherin gamma subfamily B, 2; K16496 protocadherin gamma subfamily B	GO:0050808 synapse organization	GO:0005515 protein binding	GO:0016020 membrane | GO:0070062 extracellular exosome	PF08266.9 Cadherin_2	IPR002126 Cadherin | IPR013164 Cadherin, N-terminal | IPR015919 Cadherin-like | IPR020894 Cadherin conserved site | IPR031904 Cadherin, C-terminal catenin-binding domain | IPR032455 Cadherin, cytoplasmic C-terminal domain
ENSMUSG00000081058	14833	4833	-1.57338	Down	0.0257505	ENSMUST00000167403	H3c15	protein_coding	H3 clustered histone 15 [Source:MGI Symbol;Acc:MGI:2448357]	ENSMUSP00000135215	gi|1009411827|gb|KYN30766.1|	Histone H3 [Trachymyrmex septentrionalis]	sp|P84234|H32_ONCMY	Histone H3.2 OS=Oncorhynchus mykiss PE=1 SV=2	COG2036	255	Chromatin structure and dynamics ;	Histones H3 and H4	ola:101166976	histone H3; K11253 histone H3	--	GO:0046982 protein heterodimerization activity | GO:0003677 DNA binding	GO:0000786 nucleosome | GO:0005634 nucleus	PF00125.21 Histone	IPR000164 Histone H3/CENP-A | IPR007125 Histone H2A/H2B/H3 | IPR009072 Histone-fold
ENSMUSG00000055839	7525	2563	-1.5094	Down	0.038581	ENSMUST00000069579;ENSMUST00000233593;ENSMUST00000232702;ENSMUST00000233483;ENSMUST00000233796;ENSMUST00000233857;ENSMUST00000233519;ENSMUST00000233882	Elob	protein_coding	elongin B [Source:MGI Symbol;Acc:MGI:1914923]	ENSMUSP00000066210,ENSMUSP00000156963	gi|13385800|ref|NP_080581.1|	transcription elongation factor B polypeptide 2 [Mus musculus] >gi|13592105|ref|NP_112391.1| transcription elongation factor B polypeptide 2 [Rattus norvegicus] >gi|51317294|sp|P62870.1|ELOB_RAT RecName: Full=Transcription elongation factor B polypeptide 2; AltName: Full=Elongin 18 kDa subunit; AltName: Full=Elongin-B; Short=EloB; AltName: Full=RNA polymerase II transcription factor SIII subunit …	sp|P62869|ELOB_MOUSE	Transcription elongation factor B polypeptide 2 OS=Mus musculus GN=Tceb2 PE=1 SV=1	--	--	--	--	rno:81807	Elob, Tceb2; elongin B; K03873 transcription elongation factor B, polypeptide 2	GO:0006414 translational elongation | GO:0016567 protein ubiquitination | GO:0045944 positive regulation of transcription from RNA polymerase II promoter | GO:0006368 transcription elongation from RNA polymerase II promoter	GO:0003746 translation elongation factor activity | GO:0004842 ubiquitin-protein transferase activity | GO:0031625 ubiquitin protein ligase binding | GO:0003713 transcription coactivator activity | GO:0032403 protein complex binding	GO:0070449 elongin complex | GO:0031466 Cul5-RING ubiquitin ligase complex | GO:0005667 transcription factor complex | GO:0031462 Cul2-RING ubiquitin ligase complex | GO:0070062 extracellular exosome | GO:0030891 VCB complex	PF00240.20 ubiquitin	IPR000626 Ubiquitin domain | IPR029071 Ubiquitin-related domain
ENSMUSG00000095115	3145	8926	1.54933	Up	0.0306362	ENSMUST00000178344	Itpripl2	protein_coding	inositol 1,4,5-triphosphate receptor interacting protein-like 2 [Source:MGI Symbol;Acc:MGI:2442416]	ENSMUSP00000136409	gi|83921560|ref|NP_001028552.1|	inositol 1,4,5-trisphosphate receptor-interacting protein-like 2 precursor [Mus musculus] >gi|123791930|sp|Q3UV16.1|IPIL2_MOUSE RecName: Full=Inositol 1,4,5-trisphosphate receptor-interacting protein-like 2; Flags: Precursor >gi|187956295|gb|AAI50865.1| Inositol 1,4,5-triphosphate receptor interacting protein-like 2 [Mus musculus] >gi|187956425|gb|AAI50857.1| Inositol 1,4,5-triphosphate receptor …	sp|Q3UV16|IPIL2_MOUSE	Inositol 1,4,5-trisphosphate receptor-interacting protein-like 2 OS=Mus musculus GN=Itpripl2 PE=2 SV=1	--	--	--	--	--	--	--	--	GO:0016021 integral component of membrane	PF03281.11 Mab-21	IPR024798 Inositol 1,4,5-trisphosphate receptor-interacting protein-like 2 | IPR024810 Mab-21 domain | IPR026250 Inositol 1,4,5-trisphosphate receptor-interacting protein family
ENSMUSG00000071516	2139	483	-2.10214	Down	0.000501054	ENSMUST00000070124	H2ac13	protein_coding	H2A clustered histone 13 [Source:MGI Symbol;Acc:MGI:2448457]	ENSMUSP00000088285	gi|655839886|ref|XP_002714260.2|	PREDICTED: histone H2A type 1-like [Oryctolagus cuniculus]	sp|P04908|H2A1B_HUMAN	Histone H2A type 1-B/E OS=Homo sapiens GN=HIST1H2AB PE=1 SV=2	COG5262	197	Chromatin structure and dynamics ;	Histone H2A	cfr:106729279	histone H2A type 1; K11251 histone H2A	GO:0008285 negative regulation of cell proliferation | GO:0006342 chromatin silencing	GO:0019899 enzyme binding | GO:0003677 DNA binding | GO:0046982 protein heterodimerization activity	GO:0000786 nucleosome | GO:0000790 nuclear chromatin | GO:0070062 extracellular exosome	PF00125.21 Histone	IPR002119 Histone H2A | IPR007125 Histone H2A/H2B/H3 | IPR009072 Histone-fold | IPR032454 Histone H2A, C-terminal domain | IPR032458 Histone H2A conserved site
ENSMUSG00000064360	322	11	-4.81158	Down	1.5973e-13	ENSMUST00000082411	mt-Nd3	protein_coding	mitochondrially encoded NADH dehydrogenase 3 [Source:MGI Symbol;Acc:MGI:102499]	ENSMUSP00000080998	gi|34538605|ref|NP_904335.1|	NADH dehydrogenase subunit 3 (mitochondrion) [Mus musculus] >gi|62198721|ref|YP_220557.1| NADH dehydrogenase subunit 3 (mitochondrion) [Mus musculus domesticus] >gi|17380382|sp|P03899.3|NU3M_MOUSE RecName: Full=NADH-ubiquinone oxidoreductase chain 3; AltName: Full=NADH dehydrogenase subunit 3 >gi|7770106|dbj|BAA95623.1| NADH dehydrogenase subunit 3 (mitochondrion) [Mus musculus domesticus] >gi|77…	sp|P03899|NU3M_MOUSE	NADH-ubiquinone oxidoreductase chain 3 OS=Mus musculus GN=Mtnd3 PE=1 SV=3	COG0838	83.6	Energy production and conversion ;	NADH:ubiquinone oxidoreductase subunit 3 (chain A)	mmu:17718	ND3; NADH dehydrogenase subunit 3; K03880 NADH-ubiquinone oxidoreductase chain 3 [EC:1.6.5.3]	GO:0055114 oxidation-reduction process	GO:0008137 NADH dehydrogenase (ubiquinone) activity	GO:0070469 respiratory chain | GO:0016021 integral component of membrane | GO:0031966 mitochondrial membrane	PF00507.16 Oxidored_q4	--
ENSMUSG00000064358	32942	11112	-1.52338	Down	0.0352917	ENSMUST00000082409	mt-Co3	protein_coding	mitochondrially encoded cytochrome c oxidase III [Source:MGI Symbol;Acc:MGI:102502]	ENSMUSP00000080997	gi|34538604|ref|NP_904334.1|	cytochrome c oxidase subunit III (mitochondrion) [Mus musculus] >gi|62184375|ref|YP_220569.1| cytochrome c oxidase subunit III [Mus musculus molossinus] >gi|62198720|ref|YP_220556.1| cytochrome c oxidase subunit III (mitochondrion) [Mus musculus domesticus] >gi|167716843|ref|YP_001686704.1| cytochrome c oxidase subunit III [Mus musculus musculus] >gi|544584736|sp|P00416.2|COX3_MOUSE RecName: Full…	sp|P00416|COX3_MOUSE	Cytochrome c oxidase subunit 3 OS=Mus musculus GN=mt-Co3 PE=1 SV=2	COG1845	272	Energy production and conversion ;	Heme/copper-type cytochrome/quinol oxidase, subunit 3	mmu:17710	COX3; cytochrome c oxidase subunit III; K02262 cytochrome c oxidase subunit 3	GO:1902600 hydrogen ion transmembrane transport | GO:0019646 aerobic electron transport chain	GO:0004129 cytochrome-c oxidase activity	GO:0016021 integral component of membrane | GO:0005743 mitochondrial inner membrane	PF00510.15 COX3	--
ENSMUSG00000022875	360	111	-1.65193	Down	0.0306535	ENSMUST00000125790;ENSMUST00000039492;ENSMUST00000023589;ENSMUST00000089902	Kng1	protein_coding	kininogen 1 [Source:MGI Symbol;Acc:MGI:1097705]	ENSMUSP00000121701,ENSMUSP00000040485,ENSMUSP00000023589,ENSMUSP00000087346	gi|156231021|ref|NP_001095881.1|	kininogen-1 isoform 1 precursor [Mus musculus] >gi|80474687|gb|AAI08937.1| Kng1 protein [Mus musculus]	sp|O08677|KNG1_MOUSE	Kininogen-1 OS=Mus musculus GN=Kng1 PE=1 SV=1	--	--	--	--	mmu:16644	Kng1, Kng; kininogen 1; K03898 kininogen	GO:0007204 positive regulation of cytosolic calcium ion concentration | GO:0006954 inflammatory response | GO:0030195 negative regulation of blood coagulation | GO:0010466 negative regulation of peptidase activity | GO:0042311 vasodilation	GO:0005102 receptor binding | GO:0004869 cysteine-type endopeptidase inhibitor activity	GO:0005829 cytosol | GO:0070062 extracellular exosome | GO:0072562 blood microparticle	PF00031.18 Cystatin	IPR000010 Cystatin domain | IPR002395 HMW kininogen | IPR018073 Proteinase inhibitor I25, cystatin, conserved site | IPR027358 Kininogen-type cystatin domain
ENSMUSG00000079435	3759	1027	-1.82737	Down	0.00461872	ENSMUST00000113211;ENSMUST00000172023;ENSMUST00000170828;ENSMUST00000149857;ENSMUST00000169457;ENSMUST00000152266	Rpl36a	protein_coding	ribosomal protein L36A [Source:MGI Symbol;Acc:MGI:1201789]	ENSMUSP00000108837,ENSMUSP00000126110	gi|338729370|ref|XP_001492679.3|	PREDICTED: 60S ribosomal protein L36a [Equus caballus] >gi|664777283|ref|XP_008507936.1| PREDICTED: 60S ribosomal protein L36a [Equus przewalskii]	sp|D0VWQ4|RL36A_CANLF	60S ribosomal protein L36a OS=Canis lupus familiaris GN=Rpl36a PE=1 SV=1	COG1631	138	Translation, ribosomal structure and biogenesis ;	Ribosomal protein L44E	lav:100669464	RPL36AL; ribosomal protein L36a like; K02929 large subunit ribosomal protein L44e	--	--	--	PF00935.16 Ribosomal_L44	IPR000552 Ribosomal protein L44e | IPR011332 Zinc-binding ribosomal protein
ENSMUSG00000090733	23368	4195	-2.43334	Down	1.26817e-05	ENSMUST00000196205;ENSMUST00000197028;ENSMUST00000199031;ENSMUST00000195998;ENSMUST00000200305;ENSMUST00000197361;ENSMUST00000170122;ENSMUST00000199428;ENSMUST00000196196	Rps27	protein_coding	ribosomal protein S27 [Source:MGI Symbol;Acc:MGI:1888676]	ENSMUSP00000142536,ENSMUSP00000142942,ENSMUSP00000143402,ENSMUSP00000132102	gi|973209742|ref|XP_015224301.1|	PREDICTED: 40S ribosomal protein S27, partial [Lepisosteus oculatus]	sp|Q2KHT7|RS27_BOVIN	40S ribosomal protein S27 OS=Bos taurus GN=RPS27 PE=3 SV=3	COG2051	134	Translation, ribosomal structure and biogenesis ;	Ribosomal protein S27E	amj:102560463	RPS27; ribosomal protein S27; K02978 small subunit ribosomal protein S27e	GO:0000278 mitotic cell cycle | GO:0000184 nuclear-transcribed mRNA catabolic process, nonsense-mediated decay | GO:0006415 translational termination | GO:0006413 translational initiation | GO:0000236 mitotic prometaphase | GO:0000028 ribosomal small subunit assembly | GO:0016259 selenocysteine metabolic process | GO:0008283 cell proliferation | GO:0006414 translational elongation | GO:0007264 sm…	GO:0005515 protein binding | GO:0008270 zinc ion binding | GO:0044822 poly(A) RNA binding | GO:0003677 DNA binding | GO:0003735 structural constituent of ribosome	GO:0005654 nucleoplasm | GO:0022627 cytosolic small ribosomal subunit	PF01667.14 Ribosomal_S27e	IPR000592 Ribosomal protein S27e | IPR011332 Zinc-binding ribosomal protein | IPR023407 Ribosomal protein S27e, zinc-binding domain
ENSMUSG00000031765	1335	241	-2.42472	Down	2.68436e-05	ENSMUST00000034215;ENSMUST00000212291;ENSMUST00000211807	Mt1	protein_coding	metallothionein 1 [Source:MGI Symbol;Acc:MGI:97171]	ENSMUSP00000034215,ENSMUSP00000148443,ENSMUSP00000148764	gi|20072673|gb|AAH27262.1|	Mt1 protein [Mus musculus]	sp|P47944|MT4_HUMAN	Metallothionein-4 OS=Homo sapiens GN=MT4 PE=3 SV=2	--	--	--	--	bacu:103008924	MT2A; metallothionein 2A; K14739 metallothionein 1/2	GO:0071247 cellular response to chromate | GO:0006882 cellular zinc ion homeostasis | GO:0007263 nitric oxide mediated signal transduction | GO:0071294 cellular response to zinc ion | GO:0043524 negative regulation of neuron apoptotic process | GO:0010273 detoxification of copper ion	GO:0005507 copper ion binding | GO:0008270 zinc ion binding	GO:0005829 cytosol | GO:0005764 lysosome	PF00131.17 Metallothio	IPR000006 Metallothionein, vertebrate | IPR003019 Metallothionein | IPR017854 Metallothionein domain | IPR018064 Metallothionein, vertebrate, metal binding site | IPR023587 Metallothionein domain, vertebrate
ENSMUSG00000062200	8	76	3.27197	Up	0.000138954	ENSMUST00000233255;ENSMUST00000161972;ENSMUST00000168072;ENSMUST00000050123	Vmn2r7	protein_coding	vomeronasal 2, receptor 7 [Source:MGI Symbol;Acc:MGI:2441693]	ENSMUSP00000156563,ENSMUSP00000124192,ENSMUSP00000131220	gi|568923665|ref|XP_006501959.1|	PREDICTED: vomeronasal receptor Vmn2r6 isoform X1 [Mus musculus]	sp|O70410|V2R1_MOUSE	Vomeronasal type-2 receptor 1 OS=Mus musculus GN=Vmn2r1 PE=1 SV=1	--	--	--	--	rno:295090	Vom2r45, RGD1306812, Vmn2r5; vomeronasal 2 receptor, 45; K04613 vomeronasal 2 receptor	--	--	--	PF01094.25 ANF_receptor	IPR000337 GPCR, family 3 | IPR001828 Receptor, ligand binding region | IPR011500 GPCR, family 3, nine cysteines domain | IPR017978 GPCR family 3, C-terminal | IPR028082 Periplasmic binding protein-like I
ENSMUSG00000071470	37272	9526	-1.92372	Down	0.00189023	ENSMUST00000095932;ENSMUST00000227614	Ccnb1ip1	protein_coding	cyclin B1 interacting protein 1 [Source:MGI Symbol;Acc:MGI:2685134]	ENSMUSP00000093622,ENSMUSP00000153980	gi|162287146|ref|NP_001104589.1|	E3 ubiquitin-protein ligase CCNB1IP1 [Mus musculus] >gi|597500983|sp|D3Z3K2.1|CIP1_MOUSE RecName: Full=E3 ubiquitin-protein ligase CCNB1IP1; AltName: Full=Cyclin-B1-interacting protein 1 >gi|148688876|gb|EDL20823.1| mCG50291 [Mus musculus]	sp|D3Z3K2|CIP1_MOUSE	E3 ubiquitin-protein ligase CCNB1IP1 OS=Mus musculus GN=Ccnb1ip1 PE=1 SV=1	--	--	--	--	mmu:239083	Ccnb1ip1, Gm288, Hei10, mei4; cyclin B1 interacting protein 1; K10639 E3 ubiquitin-protein ligase CCNP1IP1 [EC:2.3.2.27]	GO:0051026 chiasma assembly | GO:0001825 blastocyst formation | GO:0007286 spermatid development | GO:0016567 protein ubiquitination	GO:0008270 zinc ion binding | GO:0070740 tubulin-glutamic acid ligase activity | GO:0043773 coenzyme F420-0 gamma-glutamyl ligase activity | GO:0043774 coenzyme F420-2 alpha-glutamyl ligase activity | GO:0008766 UDP-N-acetylmuramoylalanyl-D-glutamyl-2,6-diaminopimelate-D-alanyl-D-alanine ligase activity | GO:0070736 protein-glycine ligase activity, initiating | GO:0061630 ubiquitin protein ligase…	GO:0000795 synaptonemal complex	PF14634.3 zf-RING_5	IPR001841 Zinc finger, RING-type
ENSMUSG00000037014	5	52	3.39017	Up	0.000765576	ENSMUST00000109962	Sstr4	protein_coding	somatostatin receptor 4 [Source:MGI Symbol;Acc:MGI:105372]	ENSMUSP00000105588	gi|49169818|ref|NP_033245.2|	somatostatin receptor type 4 [Mus musculus] >gi|62635496|gb|AAX90617.1| Sstr4 [Mus musculus] >gi|187952905|gb|AAI38489.1| Somatostatin receptor 4 [Mus musculus] >gi|187953933|gb|AAI38488.1| Somatostatin receptor 4 [Mus musculus]	sp|P49660|SSR4_MOUSE	Somatostatin receptor type 4 OS=Mus musculus GN=Sstr4 PE=1 SV=2	--	--	--	--	mmu:20608	Sstr4, Smstr4, sst4; somatostatin receptor 4; K04220 somatostatin receptor 4	GO:0007187 G-protein coupled receptor signaling pathway, coupled to cyclic nucleotide second messenger | GO:0071385 cellular response to glucocorticoid stimulus | GO:0030900 forebrain development | GO:0008285 negative regulation of cell proliferation | GO:0038170 somatostatin signaling pathway | GO:0030815 negative regulation of cAMP metabolic process | GO:0019369 arachidonic acid metabolic proce…	GO:0005515 protein binding | GO:0004994 somatostatin receptor activity | GO:0042923 neuropeptide binding	GO:0043005 neuron projection | GO:0005887 integral component of plasma membrane | GO:0005737 cytoplasm	PF00001.18 7tm_1	IPR000276 G protein-coupled receptor, rhodopsin-like | IPR000586 Somatostatin receptor family | IPR001512 Somatostatin receptor 4 | IPR017452 GPCR, rhodopsin-like, 7TM
ENSMUSG00000039747	399	1312	1.7614	Up	0.00867683	ENSMUST00000041048;ENSMUST00000196454;ENSMUST00000197052;ENSMUST00000198268	Orai2	protein_coding	ORAI calcium release-activated calcium modulator 2 [Source:MGI Symbol;Acc:MGI:2443195]	ENSMUSP00000037137,ENSMUSP00000142597,ENSMUSP00000143219	gi|147832096|emb|CAN36427.1|	calcium release-activated calcium channel 2 [Mus musculus]	sp|Q8BH10|ORAI2_MOUSE	Protein orai-2 OS=Mus musculus GN=Orai2 PE=2 SV=1	--	--	--	--	rno:304592	Orai2, RGD1310213; ORAI calcium release-activated calcium modulator 2; K16057 calcium release-activated calcium channel protein 2	GO:0002115 store-operated calcium entry | GO:0070588 calcium ion transmembrane transport	GO:0015279 store-operated calcium channel activity	GO:0030426 growth cone | GO:0016021 integral component of membrane	PF07856.9 Orai-1	IPR012446 Calcium release-activated calcium channel protein | IPR030034 Protein Orai-2
ENSMUSG00000010911	365	119	-1.57153	Down	0.0453537	ENSMUST00000011055;ENSMUST00000124540;ENSMUST00000155004;ENSMUST00000147131	Apip	protein_coding	APAF1 interacting protein [Source:MGI Symbol;Acc:MGI:1926788]	ENSMUSP00000011055	gi|258613873|ref|NP_062709.3|	methylthioribulose-1-phosphate dehydratase [Mus musculus] >gi|81907653|sp|Q9WVQ5.1|MTNB_MOUSE RecName: Full=Methylthioribulose-1-phosphate dehydratase; Short=MTRu-1-P dehydratase; AltName: Full=APAF1-interacting protein; AltName: Full=Monocyte/macrophage protein 19 >gi|5103283|dbj|BAA78906.1| MMRP19 [Mus musculus] >gi|20306408|gb|AAH28434.1| APAF1 interacting protein [Mus musculus] >gi|148695737|…	sp|Q9WVQ5|MTNB_MOUSE	Methylthioribulose-1-phosphate dehydratase OS=Mus musculus GN=Apip PE=1 SV=1	COG0235	196	Carbohydrate transport and metabolism ;	Ribulose-5-phosphate 4-epimerase and related epimerases and aldolases	mmu:56369	Apip, APIP2, CGI-29, Mmrp19; APAF1 interacting protein; K08964 methylthioribulose-1-phosphate dehydratase [EC:4.2.1.109]	GO:0019509 L-methionine biosynthetic process from methylthioadenosine | GO:0019284 L-methionine biosynthetic process from S-adenosylmethionine | GO:0070372 regulation of ERK1 and ERK2 cascade | GO:0043066 negative regulation of apoptotic process	GO:0046570 methylthioribulose 1-phosphate dehydratase activity | GO:0008270 zinc ion binding | GO:0042802 identical protein binding	GO:0005737 cytoplasm	PF00596.18 Aldolase_II	IPR001303 Class II aldolase/adducin N-terminal | IPR017714 Methylthioribulose-1-phosphate dehydratase | IPR027514 Methylthioribulose-1-phosphate dehydratase, eukaryotes
ENSMUSG00000045545	0	23	7.55364	Up	0.00253835	ENSMUST00000137265;ENSMUST00000007272	Krt14	protein_coding	keratin 14 [Source:MGI Symbol;Acc:MGI:96688]	ENSMUSP00000007272	gi|148670626|gb|EDL02573.1|	mCG144006, partial [Mus musculus]	sp|Q61781|K1C14_MOUSE	Keratin, type I cytoskeletal 14 OS=Mus musculus GN=Krt14 PE=1 SV=2	--	--	--	--	mmu:16664	Krt14, AI626930, CK-14, K14, Krt-1.14, Krt1-14; keratin 14; K07604 type I keratin, acidic	GO:0010212 response to ionizing radiation | GO:0045110 intermediate filament bundle assembly | GO:0042633 hair cycle | GO:0030855 epithelial cell differentiation | GO:0007568 aging | GO:0010043 response to zinc ion	GO:1990254 keratin filament binding | GO:0005198 structural molecule activity	GO:0070062 extracellular exosome | GO:0071944 cell periphery | GO:0045095 keratin filament | GO:0005737 cytoplasm | GO:0005634 nucleus	PF00038.18 Filament	IPR001664 Intermediate filament protein | IPR002957 Keratin, type I | IPR009053 Prefoldin | IPR018039 Intermediate filament protein, conserved site
ENSMUSG00000025362	43163	10925	-1.93773	Down	0.00174958	ENSMUST00000219591;ENSMUST00000026420;ENSMUST00000219773	Rps26	protein_coding	ribosomal protein S26 [Source:MGI Symbol;Acc:MGI:1351628]	ENSMUSP00000026420	gi|532100091|ref|XP_005335675.1|	PREDICTED: 40S ribosomal protein S26 [Ictidomys tridecemlineatus]	sp|Q56JV1|RS26_BOVIN	40S ribosomal protein S26 OS=Bos taurus GN=RPS26 PE=3 SV=3	COG4830	157	Translation, ribosomal structure and biogenesis ;	Ribosomal protein S26	ecb:100034009	RPS26; ribosomal protein S26; K02976 small subunit ribosomal protein S26e	GO:0000184 nuclear-transcribed mRNA catabolic process, nonsense-mediated decay | GO:0006415 translational termination | GO:0006413 translational initiation | GO:0016259 selenocysteine metabolic process | GO:0006414 translational elongation | GO:0033119 negative regulation of RNA splicing | GO:0019083 viral transcription | GO:0006614 SRP-dependent cotranslational protein targeting to membrane | GO…	GO:0005515 protein binding | GO:0003735 structural constituent of ribosome | GO:0003729 mRNA binding	GO:0005654 nucleoplasm | GO:0016020 membrane | GO:0005730 nucleolus | GO:0070062 extracellular exosome | GO:0022627 cytosolic small ribosomal subunit	PF01283.16 Ribosomal_S26e	IPR000892 Ribosomal protein S26e
ENSMUSG00000030208	3678	10216	1.51822	Up	0.0366202	ENSMUST00000205156;ENSMUST00000154270;ENSMUST00000032330;ENSMUST00000204299;ENSMUST00000204894;ENSMUST00000111907	Emp1	protein_coding	epithelial membrane protein 1 [Source:MGI Symbol;Acc:MGI:107941]	ENSMUSP00000145069,ENSMUSP00000138789,ENSMUSP00000107538,ENSMUSP00000032330	gi|6753748|ref|NP_034258.1|	epithelial membrane protein 1 isoform a [Mus musculus] >gi|568599812|ref|NP_001275556.1| epithelial membrane protein 1 isoform a [Mus musculus] >gi|2507217|sp|P47801.2|EMP1_MOUSE RecName: Full=Epithelial membrane protein 1; Short=EMP-1; AltName: Full=Tumor-associated membrane protein >gi|1580766|emb|CAA67106.1| epithelial membrane protein-1 [Mus musculus] >gi|1617132|emb|CAA67053.1| epithelial me…	sp|P47801|EMP1_MOUSE	Epithelial membrane protein 1 OS=Mus musculus GN=Emp1 PE=1 SV=2	--	--	--	--	phd:102327242	PMP22; peripheral myelin protein 22; K19289 peripheral myelin protein 22	GO:0016049 cell growth | GO:0008219 cell death | GO:0032060 bleb assembly	--	GO:0016021 integral component of membrane | GO:0005886 plasma membrane	PF00822.17 PMP22_Claudin	IPR003932 Epithelial membrane protein EMP-1 | IPR004031 PMP-22/EMP/MP20/Claudin superfamily | IPR004032 PMP-22/EMP/MP20
ENSMUSG00000014313	2996	980	-1.56765	Down	0.0283152	ENSMUST00000155638;ENSMUST00000014457;ENSMUST00000153512;ENSMUST00000127999;ENSMUST00000156915;ENSMUST00000227231	Cox6c	protein_coding	cytochrome c oxidase subunit 6C [Source:MGI Symbol;Acc:MGI:104614]	ENSMUSP00000121106,ENSMUSP00000014457,ENSMUSP00000123609,ENSMUSP00000122391	gi|16716343|ref|NP_444301.1|	cytochrome c oxidase subunit 6C [Mus musculus] >gi|48428148|sp|Q9CPQ1.3|COX6C_MOUSE RecName: Full=Cytochrome c oxidase subunit 6C; AltName: Full=Cytochrome c oxidase polypeptide VIc >gi|19354073|gb|AAH24666.1| Cytochrome c oxidase, subunit VIc [Mus musculus] >gi|62948130|gb|AAH94413.1| Cytochrome c oxidase, subunit VIc [Mus musculus]	sp|Q9CPQ1|COX6C_MOUSE	Cytochrome c oxidase subunit 6C OS=Mus musculus GN=Cox6c PE=1 SV=3	--	--	--	--	mmu:12864	Cox6c; cytochrome c oxidase subunit VIc; K02268 cytochrome c oxidase subunit 6c	GO:1902600 hydrogen ion transmembrane transport	GO:0004129 cytochrome-c oxidase activity	GO:0016021 integral component of membrane | GO:0005751 mitochondrial respiratory chain complex IV	PF02937.12 COX6C	IPR004204 Cytochrome c oxidase subunit 6C
ENSMUSG00000038347	108	28	-1.89848	Down	0.0366202	ENSMUST00000143162;ENSMUST00000053376;ENSMUST00000128194;ENSMUST00000142863;ENSMUST00000130033;ENSMUST00000127032;ENSMUST00000148430;ENSMUST00000232858;ENSMUST00000129681;ENSMUST00000155166	Tcte2	protein_coding	t-complex-associated testis expressed 2 [Source:MGI Symbol;Acc:MGI:98641]	ENSMUSP00000120730,ENSMUSP00000059081,ENSMUSP00000117173,ENSMUSP00000116305,ENSMUSP00000118927,ENSMUSP00000114746,ENSMUSP00000156694	gi|148688547|gb|EDL20494.1|	t-complex-associated testis expressed 2, isoform CRA_c [Mus musculus]	--	--	--	--	--	--	--	--	--	--	--	--	--
ENSMUSG00000028998	2243	764	-1.50922	Down	0.041482	ENSMUST00000030851	Tomm7	protein_coding	translocase of outer mitochondrial membrane 7 [Source:MGI Symbol;Acc:MGI:1913419]	ENSMUSP00000030851	gi|21313592|ref|NP_079670.1|	mitochondrial import receptor subunit TOM7 homolog [Mus musculus] >gi|206597462|ref|NP_001128646.1| mitochondrial import receptor subunit TOM7 homolog [Rattus norvegicus] >gi|60390859|sp|Q9D173.1|TOM7_MOUSE RecName: Full=Mitochondrial import receptor subunit TOM7 homolog; AltName: Full=Translocase of outer membrane 7 kDa subunit homolog >gi|33286952|gb|AAH55352.1| Translocase of outer mitochondri…	sp|Q9D173|TOM7_MOUSE	Mitochondrial import receptor subunit TOM7 homolog OS=Mus musculus GN=Tomm7 PE=3 SV=1	--	--	--	--	mmu:66169	Tomm7, 1110020J08Rik, AW047273, Tom7; translocase of outer mitochondrial membrane 7 homolog (yeast); K17771 mitochondrial import receptor subunit TOM7	GO:0031647 regulation of protein stability | GO:0030150 protein import into mitochondrial matrix | GO:0045040 protein import into mitochondrial outer membrane | GO:1903955 positive regulation of protein targeting to mitochondrion | GO:0098779 mitophagy in response to mitochondrial depolarization	GO:0015266 protein channel activity	GO:0005742 mitochondrial outer membrane translocase complex | GO:0031307 integral component of mitochondrial outer membrane	PF08038.9 Tom7	IPR012621 Mitochondrial import receptor subunit TOM7
ENSMUSG00000049230	0	17	7.12025	Up	0.0183814	ENSMUST00000061419	Gm9833	protein_coding	predicted gene 9833 [Source:MGI Symbol;Acc:MGI:3641855]	ENSMUSP00000058811	gi|148673228|gb|EDL05175.1|	mCG1028476 [Mus musculus]	sp|Q8C854|MYEF2_MOUSE	Myelin expression factor 2 OS=Mus musculus GN=Myef2 PE=1 SV=1	COG0724	75.9	General function prediction only ;	RNA-binding proteins (RRM domain)	phd:102315114	HNRNPM; heterogeneous nuclear ribonucleoprotein M; K12887 heterogeneous nuclear ribonucleoprotein M	--	GO:0044822 poly(A) RNA binding	GO:0005654 nucleoplasm | GO:0005737 cytoplasm	PF00076.19 RRM_1	IPR000504 RNA recognition motif domain | IPR012677 Nucleotide-binding alpha-beta plait domain
ENSMUSG00000024430	35	4	-3.04637	Down	0.0130322	ENSMUST00000234735;ENSMUST00000235000;ENSMUST00000115857;ENSMUST00000080415;ENSMUST00000121018;ENSMUST00000150758;ENSMUST00000119108;ENSMUST00000186263;ENSMUST00000191078	Cabyr	protein_coding	calcium-binding tyrosine-(Y)-phosphorylation regulated (fibrousheathin 2) [Source:MGI Symbol;Acc:MGI:1918382]	ENSMUSP00000157280,ENSMUSP00000157080,ENSMUSP00000111523,ENSMUSP00000079277,ENSMUSP00000113131,ENSMUSP00000118330,ENSMUSP00000113760,ENSMUSP00000140870,ENSMUSP00000140894	gi|21312836|ref|NP_081963.1|	calcium-binding tyrosine phosphorylation-regulated protein isoform a [Mus musculus] >gi|109255220|ref|NP_001035883.1| calcium-binding tyrosine phosphorylation-regulated protein isoform a [Mus musculus] >gi|109255224|ref|NP_001035885.1| calcium-binding tyrosine phosphorylation-regulated protein isoform a [Mus musculus] >gi|81881371|sp|Q9D424.1|CABYR_MOUSE RecName: Full=Calcium-binding tyrosine pho…	sp|Q9D424|CABYR_MOUSE	Calcium-binding tyrosine phosphorylation-regulated protein OS=Mus musculus GN=Cabyr PE=1 SV=1	--	--	--	--	--	--	GO:0051259 protein oligomerization | GO:0048240 sperm capacitation | GO:0019722 calcium-mediated signaling	GO:0005509 calcium ion binding | GO:0019899 enzyme binding | GO:0019904 protein domain specific binding | GO:0046982 protein heterodimerization activity	GO:0005856 cytoskeleton | GO:0097229 sperm end piece | GO:0035686 sperm fibrous sheath | GO:0097228 sperm principal piece | GO:0005737 cytoplasm | GO:0005634 nucleus	PF02197.14 RIIa	IPR003117 cAMP-dependent protein kinase regulatory subunit, dimerization-anchoring domain
ENSMUSG00000040938	9	51	2.53019	Up	0.0147036	ENSMUST00000126388;ENSMUST00000171032;ENSMUST00000144494;ENSMUST00000123716;ENSMUST00000094055;ENSMUST00000126296;ENSMUST00000136328;ENSMUST00000153993;ENSMUST00000122852;ENSMUST00000131468;ENSMUST00000149880	Slc16a11	protein_coding	solute carrier family 16 (monocarboxylic acid transporters), member 11 [Source:MGI Symbol;Acc:MGI:2663709]	ENSMUSP00000116648,ENSMUSP00000114871,ENSMUSP00000091597,ENSMUSP00000118381,ENSMUSP00000115212,ENSMUSP00000122586,ENSMUSP00000128419	gi|169234634|ref|NP_694721.2|	monocarboxylate transporter 11 [Mus musculus] >gi|81871676|sp|Q5NC32.1|MOT11_MOUSE RecName: Full=Monocarboxylate transporter 11; Short=MCT 11; AltName: Full=Solute carrier family 16 member 11	sp|Q5NC32|MOT11_MOUSE	Monocarboxylate transporter 11 OS=Mus musculus GN=Slc16a11 PE=2 SV=1	COG0477	79	Carbohydrate transport and metabolism ; Amino acid transport and metabolism ; Inorganic ion transport and metabolism ; General function prediction only ;	Permeases of the major facilitator superfamily	mmu:216867	Slc16a11, AB041591, MCT_11, MNCb-2717; solute carrier family 16 (monocarboxylic acid transporters), member 11; K08188 MFS transporter, MCP family, solute carrier family 16 (monocarboxylic acid transporters), member 11	GO:0006629 lipid metabolic process | GO:0035879 plasma membrane lactate transport	GO:0015293 symporter activity | GO:0015129 lactate transmembrane transporter activity	GO:0005887 integral component of plasma membrane | GO:0005789 endoplasmic reticulum membrane	PF07690.13 MFS_1	IPR011701 Major facilitator superfamily | IPR020846 Major facilitator superfamily domain | IPR030769 Monocarboxylate transporter 11
ENSMUSG00000031965	29	3	-3.1769	Down	0.0228563	ENSMUST00000052946;ENSMUST00000215802;ENSMUST00000166018;ENSMUST00000217597;ENSMUST00000216564	Tbx20	protein_coding	T-box 20 [Source:MGI Symbol;Acc:MGI:1888496]	ENSMUSP00000052591,ENSMUSP00000149186,ENSMUSP00000126318	gi|34878726|ref|NP_919239.1|	T-box transcription factor TBX20 isoform a [Mus musculus] >gi|118572726|sp|Q9ES03.3|TBX20_MOUSE RecName: Full=T-box transcription factor TBX20; Short=T-box protein 20 >gi|12082750|gb|AAG48599.1|AF306667_1 T-box transcription factor TBX20 [Mus musculus] >gi|148693345|gb|EDL25292.1| T-box 20, isoform CRA_b [Mus musculus]	sp|Q9ES03|TBX20_MOUSE	T-box transcription factor TBX20 OS=Mus musculus GN=Tbx20 PE=2 SV=3	--	--	--	--	mmu:57246	Tbx20, 9430010M06Rik, AL022859, Tbx12; T-box 20; K10185 T-box protein 20	GO:0003272 endocardial cushion formation | GO:0003180 aortic valve morphogenesis | GO:0035922 foramen ovale closure | GO:0003148 outflow tract septum morphogenesis | GO:0055008 cardiac muscle tissue morphogenesis | GO:0060045 positive regulation of cardiac muscle cell proliferation | GO:0003207 cardiac chamber formation | GO:0001947 heart looping | GO:0036306 embryonic heart tube elongation | GO:…	GO:0000978 RNA polymerase II core promoter proximal region sequence-specific DNA binding | GO:0001105 RNA polymerase II transcription coactivator activity | GO:0001102 RNA polymerase II activating transcription factor binding | GO:0001077 transcriptional activator activity, RNA polymerase II core promoter proximal region sequence-specific binding	GO:0005737 cytoplasm | GO:0005634 nucleus	PF00907.19 T-box	IPR001699 Transcription factor, T-box | IPR008967 p53-like transcription factor, DNA-binding | IPR018186 Transcription factor, T-box, conserved site
ENSMUSG00000089951	3	83	4.77685	Up	1.67052e-07	ENSMUST00000108995;ENSMUST00000127687;ENSMUST00000172025	Gm14435	protein_coding	predicted gene 14435 [Source:MGI Symbol;Acc:MGI:3702420]	ENSMUSP00000104623,ENSMUSP00000122299,ENSMUSP00000127044	gi|156938235|ref|NP_001028295.2|	uncharacterized protein LOC13999 [Mus musculus] >gi|313151172|ref|NP_001186237.1| uncharacterized protein LOC100503353 [Mus musculus]	sp|E9QAG8|ZN431_MOUSE	Zinc finger protein 431 OS=Mus musculus GN=Znf431 PE=1 SV=1	--	--	--	--	mmu:664987	Gm14393, OTTMUSG00000016546; predicted gene 14393; K09228 KRAB domain-containing zinc finger protein	GO:0006355 regulation of transcription, DNA-templated	GO:0003700 transcription factor activity, sequence-specific DNA binding	--	PF01352.24 KRAB	IPR001909 Krueppel-associated box
ENSMUSG00000032083	0	17	7.12025	Up	0.0183814	ENSMUST00000034588;ENSMUST00000132155	Apoa1	protein_coding	apolipoprotein A-I [Source:MGI Symbol;Acc:MGI:88049]	ENSMUSP00000034588,ENSMUSP00000150525	gi|50015|emb|CAA45560.1|	precursor Apoprotein A-I [Mus musculus] >gi|50021|emb|CAA45561.1| Apolipoprotein A-I [Mus musculus] >gi|15126646|gb|AAH12253.1| Apolipoprotein A-I [Mus musculus] >gi|18043763|gb|AAH19837.1| Apolipoprotein A-I [Mus musculus] >gi|148693732|gb|EDL25679.1| apolipoprotein A-I, isoform CRA_c [Mus musculus]	sp|Q00623|APOA1_MOUSE	Apolipoprotein A-I OS=Mus musculus GN=Apoa1 PE=1 SV=2	--	--	--	--	mmu:11806	Apoa1, Alp-1, Apoa-1, Brp-14, Ltw-1, Lvtw-1, Sep-1, Sep-2, Sep2, apo-AI, apoA-I; apolipoprotein A-I; K08757 apolipoprotein A-I	GO:0070508 cholesterol import | GO:0050919 negative chemotaxis | GO:0050728 negative regulation of inflammatory response | GO:0001935 endothelial cell proliferation | GO:0051347 positive regulation of transferase activity | GO:0033344 cholesterol efflux | GO:0001932 regulation of protein phosphorylation | GO:0034115 negative regulation of heterotypic cell-cell adhesion | GO:0051006 positive regul…	GO:0045499 chemorepellent activity | GO:0031210 phosphatidylcholine binding | GO:0005548 phospholipid transporter activity | GO:0001540 beta-amyloid binding | GO:0060228 phosphatidylcholine-sterol O-acyltransferase activator activity | GO:0015485 cholesterol binding | GO:0055102 lipase inhibitor activity | GO:0034191 apolipoprotein A-I receptor binding | GO:0042802 identical protein binding | GO:…	GO:0009986 cell surface | GO:0030139 endocytic vesicle | GO:0042627 chylomicron | GO:0072562 blood microparticle | GO:0070062 extracellular exosome | GO:0034365 discoidal high-density lipoprotein particle | GO:0034361 very-low-density lipoprotein particle | GO:0005634 nucleus | GO:0034366 spherical high-density lipoprotein particle	PF01442.15 Apolipoprotein	IPR000074 Apolipoprotein A/E
ENSMUSG00000070394	1293	272	-2.20412	Down	0.000221545	ENSMUST00000133967;ENSMUST00000094065;ENSMUST00000156556;ENSMUST00000139085;ENSMUST00000128281	Tmem256	protein_coding	transmembrane protein 256 [Source:MGI Symbol;Acc:MGI:1916436]	ENSMUSP00000114883,ENSMUSP00000091608	gi|110625730|ref|NP_081258.1|	transmembrane protein 256 precursor [Mus musculus] >gi|81862023|sp|Q5F285.1|TM256_MOUSE RecName: Full=Transmembrane protein 256; Flags: Precursor >gi|109733198|gb|AAI17080.1| RIKEN cDNA 1810027O10 gene [Mus musculus] >gi|109733979|gb|AAI17078.1| RIKEN cDNA 1810027O10 gene [Mus musculus] >gi|148680513|gb|EDL12460.1| mCG22035, isoform CRA_e [Mus musculus]	sp|Q5F285|TM256_MOUSE	Transmembrane protein 256 OS=Mus musculus GN=Tmem256 PE=1 SV=1	COG2363	60.1	Function unknown ;	Uncharacterized small membrane protein	--	--	--	--	GO:0005743 mitochondrial inner membrane | GO:0016021 integral component of membrane | GO:0070062 extracellular exosome	PF04241.12 DUF423	IPR006696 Protein of unknown function DUF423
ENSMUSG00000067288	20452	3418	-2.53656	Down	3.91243e-06	ENSMUST00000173019;ENSMUST00000087342;ENSMUST00000173879;ENSMUST00000173480;ENSMUST00000173844;ENSMUST00000166693;ENSMUST00000234017;ENSMUST00000174788	Rps28	protein_coding	ribosomal protein S28 [Source:MGI Symbol;Acc:MGI:1859516]	ENSMUSP00000134615,ENSMUSP00000110013,ENSMUSP00000134240,ENSMUSP00000133357,ENSMUSP00000133642	gi|45268967|gb|AAS55896.1|	40S ribosomal protein S28, partial [Sus scrofa]	sp|Q56JX6|RS28_BOVIN	40S ribosomal protein S28 OS=Bos taurus GN=RPS28 PE=3 SV=1	COG2053	111	Translation, ribosomal structure and biogenesis ;	Ribosomal protein S28E/S33	amj:106739155	RPS28; ribosomal protein S28; K02979 small subunit ribosomal protein S28e	GO:0000184 nuclear-transcribed mRNA catabolic process, nonsense-mediated decay | GO:0006415 translational termination | GO:0006413 translational initiation | GO:0016259 selenocysteine metabolic process | GO:0006414 translational elongation | GO:0019083 viral transcription | GO:0042274 ribosomal small subunit biogenesis | GO:0006614 SRP-dependent cotranslational protein targeting to membrane | GO:…	GO:0005515 protein binding | GO:0044822 poly(A) RNA binding | GO:0003735 structural constituent of ribosome	GO:0005654 nucleoplasm | GO:0070062 extracellular exosome | GO:0022627 cytosolic small ribosomal subunit	PF01200.15 Ribosomal_S28e	IPR000289 Ribosomal protein S28e | IPR012340 Nucleic acid-binding, OB-fold | IPR028626 Ribosomal protein S28e conserved site
ENSMUSG00000072625	48	36271	9.60218	Up	6.28797e-52	ENSMUST00000100720	Gdf2	protein_coding	growth differentiation factor 2 [Source:MGI Symbol;Acc:MGI:1321394]	ENSMUSP00000098286	gi|83582807|ref|NP_062379.3|	growth/differentiation factor 2 precursor [Mus musculus] >gi|341940736|sp|Q9WV56.2|GDF2_MOUSE RecName: Full=Growth/differentiation factor 2; Short=GDF-2; AltName: Full=Bone morphogenetic protein 9; Short=BMP-9; Flags: Precursor >gi|73695321|gb|AAI03626.1| Growth differentiation factor 2 [Mus musculus] >gi|73909023|gb|AAI03680.1| Growth differentiation factor 2 [Mus musculus] >gi|73909183|gb|AAI03…	sp|Q9WV56|GDF2_MOUSE	Growth/differentiation factor 2 OS=Mus musculus GN=Gdf2 PE=1 SV=2	--	--	--	--	mmu:12165	Gdf2, Bmp9; growth differentiation factor 2; K05503 bone morphogenetic protein 9/10	GO:0006006 glucose metabolic process | GO:0048468 cell development | GO:2000279 negative regulation of DNA biosynthetic process | GO:0045669 positive regulation of osteoblast differentiation | GO:0032924 activin receptor signaling pathway | GO:0030513 positive regulation of BMP signaling pathway | GO:0045766 positive regulation of angiogenesis | GO:0010862 positive regulation of pathway-restricte…	GO:0008083 growth factor activity | GO:0005160 transforming growth factor beta receptor binding | GO:0005125 cytokine activity	GO:0005615 extracellular space | GO:0070062 extracellular exosome	PF00688.15 TGFb_propeptide	IPR001111 Transforming growth factor-beta, N-terminal | IPR001839 Transforming growth factor-beta, C-terminal | IPR002405 Inhibin, alpha subunit | IPR015615 Transforming growth factor-beta-related | IPR017948 Transforming growth factor beta, conserved site | IPR029034 Cystine-knot cytokine
ENSMUSG00000025453	579	103	-2.4451	Down	5.13147e-05	ENSMUST00000069902;ENSMUST00000099149;ENSMUST00000109204;ENSMUST00000133627;ENSMUST00000144599	Nnt	protein_coding	nicotinamide nucleotide transhydrogenase [Source:MGI Symbol;Acc:MGI:109279]	ENSMUSP00000070564,ENSMUSP00000096753,ENSMUSP00000104827	gi|819023691|ref|NP_001295435.1|	NAD(P) transhydrogenase, mitochondrial isoform 2 [Mus musculus]	sp|Q61941|NNTM_MOUSE	NAD(P) transhydrogenase, mitochondrial OS=Mus musculus GN=Nnt PE=1 SV=2	COG1282	484	Energy production and conversion ;	NAD/NADP transhydrogenase beta subunit	mmu:18115	Nnt, 4930423F13Rik, AI323702, BB168308; nicotinamide nucleotide transhydrogenase; K00323 NAD(P) transhydrogenase [EC:1.6.1.2]	GO:0045454 cell redox homeostasis | GO:0006740 NADPH regeneration | GO:0015992 proton transport	GO:0051287 NAD binding | GO:0008750 NAD(P)+ transhydrogenase (AB-specific) activity | GO:0050661 NADP binding	GO:0016021 integral component of membrane | GO:0005743 mitochondrial inner membrane	PF05222.12 AlaDh_PNT_N	IPR007698 Alanine dehydrogenase/pyridine nucleotide transhydrogenase, NAD(H)-binding domain | IPR007886 Alanine dehydrogenase/pyridine nucleotide transhydrogenase, N-terminal | IPR008142 Alanine dehydrogenase/NAD(P) transhydrogenase, conserved site-1 | IPR008143 Alanine dehydrogenase/pyridine nucleotide transhydrogenase, conserved site-2 | IPR012136 NADP transhydrogenase, beta subunit | IPR016040…
ENSMUSG00000035692	387	123	-1.60829	Down	0.0372989	ENSMUST00000085425	Isg15	protein_coding	ISG15 ubiquitin-like modifier [Source:MGI Symbol;Acc:MGI:1855694]	ENSMUSP00000082548	gi|226874851|ref|NP_056598.2|	ubiquitin-like protein ISG15 precursor [Mus musculus] >gi|38258939|sp|Q64339.4|ISG15_MOUSE RecName: Full=Ubiquitin-like protein ISG15; AltName: Full=Interferon-induced 15 kDa protein; AltName: Full=Interferon-induced 17 kDa protein; Short=IP17; AltName: Full=Ubiquitin cross-reactive protein; Flags: Precursor >gi|21619273|gb|AAH31424.1| ISG15 ubiquitin-like modifier [Mus musculus] >gi|52789473|gb|…	sp|Q64339|ISG15_MOUSE	Ubiquitin-like protein ISG15 OS=Mus musculus GN=Isg15 PE=1 SV=4	COG5272	82	Posttranslational modification, protein turnover, chaperones ;	Ubiquitin	mmu:100038882	Isg15, G1p2, IGI15, IP17, Irfp, UCRP; ISG15 ubiquitin-like modifier; K12159 ubiquitin cross-reactive protein	GO:0034340 response to type I interferon | GO:0042742 defense response to bacterium | GO:0032020 ISG15-protein conjugation | GO:0019941 modification-dependent protein catabolic process | GO:0045648 positive regulation of erythrocyte differentiation | GO:0032649 regulation of interferon-gamma production | GO:0045071 negative regulation of viral genome replication | GO:0031397 negative regulation o…	GO:0031386 protein tag | GO:0005515 protein binding	GO:0005576 extracellular region | GO:0005737 cytoplasm	PF00240.20 ubiquitin	IPR000626 Ubiquitin domain | IPR029071 Ubiquitin-related domain
ENSMUSG00000024379	140	456	1.74711	Up	0.0137776	ENSMUST00000025237;ENSMUST00000234876	Tslp	protein_coding	thymic stromal lymphopoietin [Source:MGI Symbol;Acc:MGI:1855696]	ENSMUSP00000025237	gi|10946698|ref|NP_067342.1|	thymic stromal lymphopoietin precursor [Mus musculus] >gi|81868532|sp|Q9JIE6.1|TSLP_MOUSE RecName: Full=Thymic stromal lymphopoietin; AltName: Full=Thymic stroma-derived lymphopoietin; Flags: Precursor >gi|8925944|gb|AAF81677.1|AF232937_1 thymic stroma derived lymphopoietin [Mus musculus] >gi|120577713|gb|AAI30231.1| Thymic stromal lymphopoietin [Mus musculus] >gi|148664648|gb|EDK97064.1| thymic …	sp|Q9JIE6|TSLP_MOUSE	Thymic stromal lymphopoietin OS=Mus musculus GN=Tslp PE=1 SV=1	--	--	--	--	mmu:53603	Tslp; thymic stromal lymphopoietin; K05436 thymic stromal lymphopoietin	--	GO:0005125 cytokine activity	GO:0005615 extracellular space	PF15216.3 TSLP	IPR029189 Thymic stromal lymphopoietin
ENSMUSG00000061482	9315	2363	-1.93446	Down	0.00180576	ENSMUST00000102968	H4c4	protein_coding	H4 clustered histone 4 [Source:MGI Symbol;Acc:MGI:2448423]	ENSMUSP00000100033	gi|1007715256|ref|XP_015799297.1|	PREDICTED: histone H4-like [Nothobranchius furzeri]	sp|Q28DR4|H4_XENTR	Histone H4 OS=Xenopus tropicalis GN=TGas006m08.1 PE=3 SV=1	COG2036	162	Chromatin structure and dynamics ;	Histones H3 and H4	cmk:103172236	histone H4; K11254 histone H4	GO:0000278 mitotic cell cycle | GO:0031047 gene silencing by RNA | GO:0045815 positive regulation of gene expression, epigenetic | GO:0000183 chromatin silencing at rDNA | GO:0000724 double-strand break repair via homologous recombination | GO:1904837 beta-catenin-TCF complex assembly | GO:0006303 double-strand break repair via nonhomologous end joining | GO:0051290 protein heterotetramerization …	GO:0035575 histone demethylase activity (H4-K20 specific) | GO:0042393 histone binding | GO:0044822 poly(A) RNA binding | GO:0046982 protein heterodimerization activity | GO:0019904 protein domain specific binding | GO:0003677 DNA binding	GO:0005654 nucleoplasm | GO:0016020 membrane | GO:0000784 nuclear chromosome, telomeric region | GO:0000786 nucleosome | GO:0070062 extracellular exosome	PF15511.3 CENP-T_C	IPR001951 Histone H4 | IPR004823 TATA box binding protein associated factor (TAF) | IPR009072 Histone-fold | IPR019809 Histone H4, conserved site
ENSMUSG00000022040	4	32	3.00489	Up	0.0261001	ENSMUST00000224698;ENSMUST00000225309;ENSMUST00000070515	Ephx2	protein_coding	epoxide hydrolase 2, cytoplasmic [Source:MGI Symbol;Acc:MGI:99500]	ENSMUSP00000153161,ENSMUSP00000152894,ENSMUSP00000069209	gi|31982393|ref|NP_031966.2|	bifunctional epoxide hydrolase 2 isoform a [Mus musculus] >gi|1708375|sp|P34914.2|HYES_MOUSE RecName: Full=Bifunctional epoxide hydrolase 2; Includes: RecName: Full=Cytosolic epoxide hydrolase 2; Short=CEH; AltName: Full=Epoxide hydratase; AltName: Full=Soluble epoxide hydrolase; Short=SEH; Includes: RecName: Full=Lipid-phosphate phosphatase >gi|6573467|pdb|1CQZ|A Chain A, Crystal Structure Of Mu…	sp|P34914|HYES_MOUSE	Bifunctional epoxide hydrolase 2 OS=Mus musculus GN=Ephx2 PE=1 SV=2	COG0596	202	General function prediction only ;	Predicted hydrolases or acyltransferases (alpha/beta hydrolase superfamily)	mmu:13850	Ephx2, CEH, Eph2, SEH, sEP; epoxide hydrolase 2, cytoplasmic; K08726 soluble epoxide hydrolase / lipid-phosphate phosphatase [EC:3.3.2.10 3.1.3.76]	GO:0009636 response to toxic substance | GO:0043651 linoleic acid metabolic process | GO:0046272 stilbene catabolic process | GO:0090181 regulation of cholesterol metabolic process | GO:0046839 phospholipid dephosphorylation | GO:0019233 sensory perception of pain | GO:0045777 positive regulation of blood pressure | GO:0010628 positive regulation of gene expression | GO:0042632 cholesterol homeos…	GO:0033885 10-hydroxy-9-(phosphonooxy)octadecanoate phosphatase activity | GO:0015643 toxic substance binding | GO:0042577 lipid phosphatase activity | GO:0005102 receptor binding | GO:0000287 magnesium ion binding | GO:0042803 protein homodimerization activity | GO:0004301 epoxide hydrolase activity	GO:0005829 cytosol | GO:0005777 peroxisome | GO:0070062 extracellular exosome	PF13419.3 HAD_2	IPR000073 Alpha/beta hydrolase fold-1 | IPR000639 Epoxide hydrolase-like | IPR006439 HAD hydrolase, subfamily IA | IPR023198 Phosphoglycolate phosphatase, domain 2 | IPR023214 HAD-like domain | IPR029058 Alpha/Beta hydrolase fold
ENSMUSG00000091228	268	0	-11.0447	Down	1.17238e-19	ENSMUST00000170303	Gm20390	protein_coding	predicted gene 20390 [Source:MGI Symbol;Acc:MGI:5141855]	ENSMUSP00000132590	gi|79160090|gb|AAI07895.1|	NME1-NME2 protein [Homo sapiens] >gi|119614969|gb|EAW94563.1| hCG2001850, isoform CRA_a [Homo sapiens]	sp|Q01768|NDKB_MOUSE	Nucleoside diphosphate kinase B OS=Mus musculus GN=Nme2 PE=1 SV=1	COG0105	203	Nucleotide transport and metabolism ;	Nucleoside diphosphate kinase	hsa:654364	NME1-NME2, NM23-LV, NMELV; NME1-NME2 readthrough; K00940 nucleoside-diphosphate kinase [EC:2.7.4.6]	GO:0045618 positive regulation of keratinocyte differentiation | GO:0006183 GTP biosynthetic process | GO:0006165 nucleoside diphosphate phosphorylation | GO:0098779 mitophagy in response to mitochondrial depolarization | GO:0018106 peptidyl-histidine phosphorylation | GO:0015949 nucleobase-containing small molecule interconversion | GO:0050679 positive regulation of epithelial cell proliferation…	GO:0004673 protein histidine kinase activity | GO:0046872 metal ion binding | GO:0003700 transcription factor activity, sequence-specific DNA binding | GO:0005515 protein binding | GO:0004550 nucleoside diphosphate kinase activity | GO:0005524 ATP binding | GO:0003677 DNA binding	GO:0005925 focal adhesion | GO:0030027 lamellipodium | GO:0005829 cytosol | GO:0070062 extracellular exosome | GO:0071944 cell periphery | GO:0005634 nucleus | GO:0001726 ruffle	PF00334.16 NDK	--
ENSMUSG00000036199	1165	115	-3.29482	Down	2.2616e-09	ENSMUST00000110167	Ndufa13	protein_coding	NADH:ubiquinone oxidoreductase subunit A13 [Source:MGI Symbol;Acc:MGI:1914434]	ENSMUSP00000105796	gi|12963633|ref|NP_075801.1|	NADH dehydrogenase [ubiquinone] 1 alpha subcomplex subunit 13 [Mus musculus] >gi|20139162|sp|Q9ERS2.3|NDUAD_MOUSE RecName: Full=NADH dehydrogenase [ubiquinone] 1 alpha subcomplex subunit 13; AltName: Full=Cell death regulatory protein GRIM-19; AltName: Full=Complex I-B16.6; Short=CI-B16.6; AltName: Full=Gene associated with retinoic and interferon-induced mortality 19 protein; Short=GRIM-19; Shor…	sp|Q9ERS2|NDUAD_MOUSE	NADH dehydrogenase [ubiquinone] 1 alpha subcomplex subunit 13 OS=Mus musculus GN=Ndufa13 PE=1 SV=3	--	--	--	--	mmu:67184	Ndufa13, 2700054G14Rik, AU022060, CDA016, CGI-39, GRIM-19, Grim19; NADH dehydrogenase (ubiquinone) 1 alpha subcomplex, 13; K11353 NADH dehydrogenase (ubiquinone) 1 alpha subcomplex subunit 13	GO:0045892 negative regulation of transcription, DNA-templated | GO:0043280 positive regulation of cysteine-type endopeptidase activity involved in apoptotic process | GO:0072593 reactive oxygen species metabolic process | GO:2001243 negative regulation of intrinsic apoptotic signaling pathway | GO:0045039 protein import into mitochondrial inner membrane | GO:0097191 extrinsic apoptotic signaling…	GO:0005524 ATP binding | GO:0008137 NADH dehydrogenase (ubiquinone) activity	GO:0016021 integral component of membrane | GO:0005654 nucleoplasm | GO:0005747 mitochondrial respiratory chain complex I | GO:0070062 extracellular exosome	PF06212.9 GRIM-19	IPR009346 GRIM-19
ENSMUSG00000039114	2197	7730	1.85929	Up	0.00340029	ENSMUST00000224323;ENSMUST00000037623;ENSMUST00000223611;ENSMUST00000122286;ENSMUST00000224960	Nrn1	protein_coding	neuritin 1 [Source:MGI Symbol;Acc:MGI:1915654]	ENSMUSP00000153099,ENSMUSP00000040900,ENSMUSP00000153395,ENSMUSP00000113721,ENSMUSP00000153173	gi|568981958|ref|XP_006516801.1|	PREDICTED: neuritin isoform X1 [Mus musculus]	sp|Q8CFV4|NRN1_MOUSE	Neuritin OS=Mus musculus GN=Nrn1 PE=1 SV=1	--	--	--	--	lcm:102355909	breast cancer anti-estrogen resistance protein 1-like; K05726 breast cancer anti-estrogen resistance 1	GO:1990138 neuron projection extension | GO:0007409 axonogenesis	GO:0046982 protein heterodimerization activity | GO:0042803 protein homodimerization activity	GO:0030054 cell junction | GO:0046658 anchored component of plasma membrane | GO:0045202 synapse | GO:0005615 extracellular space | GO:0032281 AMPA glutamate receptor complex	PF15056.3 NRN1	IPR026144 Neuritin family
ENSMUSG00000090862	11250	2414	-2.17595	Down	0.000188662	ENSMUST00000170953;ENSMUST00000205490;ENSMUST00000206712;ENSMUST00000206963;ENSMUST00000205548;ENSMUST00000205906;ENSMUST00000205265;ENSMUST00000206748	Rps13	protein_coding	ribosomal protein S13 [Source:MGI Symbol;Acc:MGI:1915302]	ENSMUSP00000126294,ENSMUSP00000146136,ENSMUSP00000146272	gi|958720315|ref|XP_014703348.1|	PREDICTED: 40S ribosomal protein S13 [Equus asinus]	sp|Q56JX8|RS13_BOVIN	40S ribosomal protein S13 OS=Bos taurus GN=RPS13 PE=2 SV=3	COG0184	250	Translation, ribosomal structure and biogenesis ;	Ribosomal protein S15P/S13E	acs:100562063	rps13; ribosomal protein S13; K02953 small subunit ribosomal protein S13e	GO:0000184 nuclear-transcribed mRNA catabolic process, nonsense-mediated decay | GO:0006415 translational termination | GO:0006413 translational initiation | GO:0016259 selenocysteine metabolic process | GO:0006414 translational elongation | GO:0033119 negative regulation of RNA splicing | GO:0048015 phosphatidylinositol-mediated signaling | GO:0019083 viral transcription | GO:0006614 SRP-depende…	GO:0016301 kinase activity | GO:0005515 protein binding | GO:0035091 phosphatidylinositol binding | GO:0016773 phosphotransferase activity, alcohol group as acceptor | GO:0070181 small ribosomal subunit rRNA binding | GO:0003735 structural constituent of ribosome | GO:1990932 5.8S rRNA binding | GO:0003729 mRNA binding	GO:0005925 focal adhesion | GO:0005654 nucleoplasm | GO:0016020 membrane | GO:0005730 nucleolus | GO:0070062 extracellular exosome | GO:0022627 cytosolic small ribosomal subunit	PF08069.9 Ribosomal_S13_N	IPR000589 Ribosomal protein S15 | IPR009068 S15/NS1, RNA-binding | IPR012606 Ribosomal protein S13/S15, N-terminal | IPR023029 Ribosomal protein S15P
ENSMUSG00000067919	81	16	-2.28664	Down	0.00881527	ENSMUST00000075775;ENSMUST00000150197	Rex2	protein_coding	reduced expression 2 [Source:MGI Symbol;Acc:MGI:1328322]	ENSMUSP00000075179	gi|295293068|ref|NP_001171238.1|	reduced expression 2 [Mus musculus]	sp|Q5R5Q6|ZN571_PONAB	Zinc finger protein 571 OS=Pongo abelii GN=ZNF571 PE=2 SV=1	COG5048	91.3	General function prediction only ;	FOG: Zn-finger	mmu:667666	Zfp600, Gm13164, OTTMUSG00000010694; zinc finger protein 600; K09228 KRAB domain-containing zinc finger protein	GO:0090305 nucleic acid phosphodiester bond hydrolysis | GO:0006355 regulation of transcription, DNA-templated	GO:0003676 nucleic acid binding | GO:0043765 T/G mismatch-specific endonuclease activity | GO:0044824 retroviral 3' processing activity | GO:0042578 phosphoric ester hydrolase activity | GO:0003700 transcription factor activity, sequence-specific DNA binding | GO:0000175 3'-5'-exoribonuclease activity	GO:0005739 mitochondrion | GO:0005730 nucleolus | GO:0005925 focal adhesion	PF01352.24 KRAB	IPR001909 Krueppel-associated box | IPR007087 Zinc finger, C2H2 | IPR013087 Zinc finger C2H2-type/integrase DNA-binding domain | IPR015880 Zinc finger, C2H2-like
ENSMUSG00000023904	1519	302	-2.28562	Down	0.000100827	ENSMUST00000180140;ENSMUST00000024697;ENSMUST00000179928	Hcfc1r1	protein_coding	host cell factor C1 regulator 1 (XPO1-dependent) [Source:MGI Symbol;Acc:MGI:2663619]	ENSMUSP00000137336,ENSMUSP00000024697,ENSMUSP00000137205	gi|32451500|ref|NP_861542.1|	host cell factor C1 regulator 1 [Mus musculus] >gi|81881063|sp|Q9CYQ5.1|HPIP_MOUSE RecName: Full=Host cell factor C1 regulator 1; AltName: Full=HCF-1 beta-propeller-interacting protein >gi|51259654|gb|AAH79865.1| Host cell factor C1 regulator 1 (XPO1-dependent) [Mus musculus] >gi|148690311|gb|EDL22258.1| host cell factor C1 regulator 1 (XPO1-dependent), isoform CRA_a [Mus musculus]	sp|Q9CYQ5|HPIP_MOUSE	Host cell factor C1 regulator 1 OS=Mus musculus GN=Hcfc1r1 PE=2 SV=1	--	--	--	--	--	--	--	--	GO:0005634 nucleus | GO:0005737 cytoplasm	PF15226.3 HPIP	IPR029195 Host cell factor C1 regulator 1
ENSMUSG00000040752	0	52	8.72623	Up	2.85611e-07	ENSMUST00000081857;ENSMUST00000226297;ENSMUST00000228731;ENSMUST00000227905;ENSMUST00000131892;ENSMUST00000124930;ENSMUST00000111456	Myh6	protein_coding	myosin, heavy polypeptide 6, cardiac muscle, alpha [Source:MGI Symbol;Acc:MGI:97255]	ENSMUSP00000080538,ENSMUSP00000154634,ENSMUSP00000153961,ENSMUSP00000115615,ENSMUSP00000107083	gi|148704367|gb|EDL36314.1|	mCG133649, isoform CRA_b, partial [Mus musculus]	sp|Q02566|MYH6_MOUSE	Myosin-6 OS=Mus musculus GN=Myh6 PE=1 SV=2	COG5022	792	Cytoskeleton ;	Myosin heavy chain	mmu:17888	Myh6, A830009F23Rik, AA517445, Myhc-a, Myhca, alpha-MHC; myosin, heavy polypeptide 6, cardiac muscle, alpha; K17751 myosin heavy chain 6/7	GO:0002027 regulation of heart rate | GO:0001701 in utero embryonic development | GO:0007522 visceral muscle development | GO:0060048 cardiac muscle contraction | GO:0048739 cardiac muscle fiber development | GO:0008217 regulation of blood pressure | GO:0043462 regulation of ATPase activity | GO:0002026 regulation of the force of heart contraction | GO:0030049 muscle filament sliding | GO:0045214…	GO:0042803 protein homodimerization activity | GO:0000146 microfilament motor activity | GO:0030898 actin-dependent ATPase activity | GO:0005524 ATP binding | GO:0019901 protein kinase binding | GO:0046982 protein heterodimerization activity | GO:0030899 calcium-dependent ATPase activity | GO:0005516 calmodulin binding | GO:0003779 actin binding	GO:0032982 myosin filament | GO:0005739 mitochondrion | GO:0001725 stress fiber | GO:0005859 muscle myosin complex | GO:0030018 Z disc	PF02736.16 Myosin_N	IPR000048 IQ motif, EF-hand binding site | IPR001609 Myosin head, motor domain | IPR002928 Myosin tail | IPR004009 Myosin, N-terminal, SH3-like | IPR027401 Myosin-like IQ motif-containing domain | IPR027417 P-loop containing nucleoside triphosphate hydrolase
ENSMUSG00000054191	21	1	-4.18914	Down	0.0238534	ENSMUST00000067060	Klf1	protein_coding	Kruppel-like factor 1 (erythroid) [Source:MGI Symbol;Acc:MGI:1342771]	ENSMUSP00000064366	gi|225543580|ref|NP_034765.2|	Krueppel-like factor 1 [Mus musculus]	sp|P46099|KLF1_MOUSE	Krueppel-like factor 1 OS=Mus musculus GN=Klf1 PE=1 SV=2	COG5048	76.6	General function prediction only ;	FOG: Zn-finger	mmu:16596	Klf1, Eklf, Nan; Kruppel-like factor 1 (erythroid); K09204 krueppel-like factor 1	GO:0043249 erythrocyte maturation | GO:0035162 embryonic hemopoiesis | GO:0006338 chromatin remodeling | GO:0045944 positive regulation of transcription from RNA polymerase II promoter | GO:0001889 liver development | GO:0001701 in utero embryonic development	GO:0033613 activating transcription factor binding | GO:0046872 metal ion binding | GO:0019904 protein domain specific binding | GO:0000987 core promoter proximal region sequence-specific DNA binding	GO:0000790 nuclear chromatin	PF16832.2 EKLF_TAD1	IPR007087 Zinc finger, C2H2 | IPR013087 Zinc finger C2H2-type/integrase DNA-binding domain | IPR015880 Zinc finger, C2H2-like | IPR031784 Krueppel-like factor 1, transactivation domain 2 | IPR031786 Krueppel-like factor 1, transactivation domain 1
ENSMUSG00000087687	182	39	-2.17444	Down	0.00305574	ENSMUST00000208950;ENSMUST00000208185;ENSMUST00000156380;ENSMUST00000207257;ENSMUST00000207428;ENSMUST00000207389	Pet100	protein_coding	PET100 homolog [Source:MGI Symbol;Acc:MGI:3615306]	ENSMUSP00000146433,ENSMUSP00000137626,ENSMUSP00000146950,ENSMUSP00000146942	gi|305410813|ref|NP_001182173.1|	protein PET100 homolog, mitochondrial [Mus musculus] >gi|378548305|sp|P0DJE0.1|PT100_MOUSE RecName: Full=Protein PET100 homolog, mitochondrial; Flags: Precursor >gi|148689981|gb|EDL21928.1| mCG13005, isoform CRA_a [Mus musculus]	sp|P0DJE0|PT100_MOUSE	Protein PET100 homolog, mitochondrial OS=Mus musculus GN=Pet100 PE=1 SV=1	--	--	--	--	mmu:100503890	Pet100, 2900053A13Rik; PET100 homolog; K18186 protein PET100, animal type	GO:0033617 mitochondrial respiratory chain complex IV assembly	--	GO:0016021 integral component of membrane | GO:0005739 mitochondrion	PF09803.6 DUF2346	IPR018625 Protein Pet100
ENSMUSG00000026946	87	23	-1.86937	Down	0.0444613	ENSMUST00000028314;ENSMUST00000145481;ENSMUST00000112705;ENSMUST00000142868;ENSMUST00000145656;ENSMUST00000123521	Nmi	protein_coding	N-myc (and STAT) interactor [Source:MGI Symbol;Acc:MGI:1928368]	ENSMUSP00000028314,ENSMUSP00000108325,ENSMUSP00000122318,ENSMUSP00000120647,ENSMUSP00000115428	gi|33469125|ref|NP_062274.1|	N-myc-interactor [Mus musculus] >gi|213688426|ref|NP_001135420.1| N-myc-interactor [Mus musculus] >gi|213688428|ref|NP_001135421.1| N-myc-interactor [Mus musculus] >gi|15214086|sp|O35309.1|NMI_MOUSE RecName: Full=N-myc-interactor; Short=Nmi; AltName: Full=N-myc and STAT interactor >gi|2425060|gb|AAB70819.1| Nmi [Mus musculus]	sp|O35309|NMI_MOUSE	N-myc-interactor OS=Mus musculus GN=Nmi PE=1 SV=1	--	--	--	--	crg:105332066	poly [ADP-ribose] polymerase 14-like; K15261 poly [ADP-ribose] polymerase 10/14/15 [EC:2.4.2.30]	GO:1902524 positive regulation of protein K48-linked ubiquitination | GO:0045355 negative regulation of interferon-alpha biosynthetic process | GO:0045824 negative regulation of innate immune response | GO:0045358 negative regulation of interferon-beta biosynthetic process	GO:0005515 protein binding	GO:0005654 nucleoplasm | GO:0005737 cytoplasm	PF07334.10 IFP_35_N	IPR009909 Nmi/IFP 35 domain | IPR009938 Nmi/IFP 35 domain, N-terminal | IPR012677 Nucleotide-binding alpha-beta plait domain
ENSMUSG00000107877	10	58	2.56533	Up	0.00884656	ENSMUST00000108506;ENSMUST00000204457	Gm43951	protein_coding	predicted gene, 43951 [Source:MGI Symbol;Acc:MGI:5690343]	ENSMUSP00000144817,ENSMUSP00000104146	gi|556761057|ref|XP_005975841.1|	PREDICTED: collagen alpha-2(I) chain-like [Pantholops hodgsonii]	--	--	--	--	--	--	sbq:104651959	collagen alpha-2(I) chain; K06236 collagen, type I, alpha	--	--	--	--	--
ENSMUSG00000078880	0	24	7.61472	Up	0.00180576	ENSMUST00000126807;ENSMUST00000108990;ENSMUST00000119149;ENSMUST00000117267	Gm14308	protein_coding	predicted gene 14308 [Source:MGI Symbol;Acc:MGI:3782921]	ENSMUSP00000104618,ENSMUSP00000113990,ENSMUSP00000112702	gi|150246529|ref|NP_001092819.1|	KRAB box and zinc finger, C2H2 type domain containing [Mus musculus] >gi|154426318|ref|NP_001093885.1| KRAB box and zinc finger, C2H2 type domain containing [Mus musculus] >gi|156119634|ref|NP_001095274.1| KRAB box and zinc finger, C2H2 type domain containing protein [Mus musculus] >gi|294712554|ref|NP_001171014.1| KRAB box and zinc finger, C2H2 type domain containing [Mus musculus] >gi|374429568…	sp|Q8BZW4|ZN120_MOUSE	Zinc finger protein 120 OS=Mus musculus GN=Zfp120 PE=2 SV=1	COG5048	114	General function prediction only ;	FOG: Zn-finger	mmu:627914	Gm14430, OTTMUSG00000016607; predicted gene 14430; K09228 KRAB domain-containing zinc finger protein	--	--	--	PF01352.24 KRAB	IPR001909 Krueppel-associated box | IPR007087 Zinc finger, C2H2 | IPR013087 Zinc finger C2H2-type/integrase DNA-binding domain | IPR015880 Zinc finger, C2H2-like
ENSMUSG00000091013	36	6	-2.51633	Down	0.0432807	ENSMUST00000227629;ENSMUST00000227586;ENSMUST00000169123	Vmn1r1	protein_coding	vomeronasal 1 receptor 1 [Source:MGI Symbol;Acc:MGI:3647849]	ENSMUSP00000153940,ENSMUSP00000154404,ENSMUSP00000133035	gi|285398425|ref|NP_001160200.1|	vomeronasal type-1 receptor A16 [Mus musculus]	sp|Q5J3F6|V1R90_RAT	Vomeronasal type-1 receptor 90 OS=Rattus norvegicus GN=Vom1r90 PE=2 SV=1	--	--	--	--	mmu:625823	Vmn1r1, EG625823, Gm6628; vomeronasal 1 receptor 1; K04614 vomeronasal1 receptor	GO:0046513 ceramide biosynthetic process | GO:0007186 G-protein coupled receptor signaling pathway | GO:0055114 oxidation-reduction process	GO:0042284 sphingolipid delta-4 desaturase activity | GO:0016503 pheromone receptor activity	GO:0016021 integral component of membrane	PF03402.11 V1R	IPR004072 Vomeronasal receptor, type 1 | IPR017452 GPCR, rhodopsin-like, 7TM
ENSMUSG00000114133	22	0	-7.44569	Down	0.00358684	ENSMUST00000220449	Gm20075	protein_coding	predicted gene, 20075 [Source:MGI Symbol;Acc:MGI:5012260]	ENSMUSP00000152074	gi|568929722|ref|XP_006503448.1|	PREDICTED: transcription factor BTF3 homolog 4 isoform X2 [Mus musculus]	sp|Q96K17|BT3L4_HUMAN	Transcription factor BTF3 homolog 4 OS=Homo sapiens GN=BTF3L4 PE=1 SV=1	--	--	--	--	ssc:100736651	transcription factor BTF3 homolog 4; K01527 nascent polypeptide-associated complex subunit beta	--	--	--	PF01849.15 NAC	IPR002715 Nascent polypeptide-associated complex NAC domain
ENSMUSG00000096036	23	1	-4.31963	Down	0.0129621	ENSMUST00000185926;ENSMUST00000178779	Gm21778	protein_coding	predicted gene, 21778 [Source:MGI Symbol;Acc:MGI:5433942]	ENSMUSP00000139442,ENSMUSP00000136470	gi|755566942|ref|XP_011249330.1|	PREDICTED: Y-linked testis-specific protein 1-like [Mus musculus]	sp|P13675|SSTY1_MOUSE	Y-linked testis-specific protein 1 OS=Mus musculus GN=Ssty1 PE=1 SV=1	--	--	--	--	--	--	--	--	--	PF02513.14 Spin-Ssty	IPR003671 Spindlin/spermiogenesis-specific protein
ENSMUSG00000030523	15	0	-6.89701	Down	0.037489	ENSMUST00000085222;ENSMUST00000205348;ENSMUST00000206277;ENSMUST00000206314;ENSMUST00000205960;ENSMUST00000205728;ENSMUST00000177102;ENSMUST00000205434;ENSMUST00000206263;ENSMUST00000206107;ENSMUST00000205731;ENSMUST00000206706;ENSMUST00000205690;ENSMUST00000206049;ENSMUST00000205684;ENSMUST00000206453;ENSMUST00000205610;ENSMUST00000205994;ENSMUST00000206740;ENSMUST00000206000;ENSMUST00000205939;…	Trpm1	protein_coding	transient receptor potential cation channel, subfamily M, member 1 [Source:MGI Symbol;Acc:MGI:1330305]	ENSMUSP00000082318,ENSMUSP00000145708,ENSMUSP00000146226,ENSMUSP00000145593,ENSMUSP00000146140,ENSMUSP00000146257,ENSMUSP00000145776,ENSMUSP00000146265,ENSMUSP00000145814,ENSMUSP00000145995,ENSMUSP00000146163,ENSMUSP00000146323,ENSMUSP00000146073,ENSMUSP00000134947	gi|169881257|ref|NP_001034193.2|	transient receptor potential cation channel subfamily M member 1 isoform 2 [Mus musculus] >gi|182701420|sp|Q2TV84.2|TRPM1_MOUSE RecName: Full=Transient receptor potential cation channel subfamily M member 1; AltName: Full=Long transient receptor potential channel 1; Short=LTrpC1; AltName: Full=Melastatin-1 >gi|295149302|gb|AAO43093.2| transient receptor potential cation channel subfamily M member…	sp|Q2TV84|TRPM1_MOUSE	Transient receptor potential cation channel subfamily M member 1 OS=Mus musculus GN=Trpm1 PE=2 SV=2	--	--	--	--	mmu:17364	Trpm1, 4732499L03Rik, AI606771, Ltrpc1, Mlsn1; transient receptor potential cation channel, subfamily M, member 1; K04976 transient receptor potential cation channel subfamily M member 1	GO:0071482 cellular response to light stimulus | GO:0046548 retinal rod cell development | GO:0070588 calcium ion transmembrane transport | GO:0007216 G-protein coupled glutamate receptor signaling pathway | GO:0060402 calcium ion transport into cytosol | GO:0007601 visual perception | GO:0051262 protein tetramerization	GO:0005262 calcium channel activity	GO:0035841 new growing cell tip | GO:0016021 integral component of membrane | GO:0005622 intracellular | GO:0005886 plasma membrane	PF00520.28 Ion_trans	IPR005821 Ion transport domain | IPR029588 Transient receptor potential cation channel subfamily M member 1 | IPR032415 TRPM, tetramerisation domain
ENSMUSG00000028307	1	26	4.57928	Up	0.00542559	ENSMUST00000029987;ENSMUST00000148415;ENSMUST00000144372	Aldob	protein_coding	aldolase B, fructose-bisphosphate [Source:MGI Symbol;Acc:MGI:87995]	ENSMUSP00000029987	gi|21450291|ref|NP_659152.1|	fructose-bisphosphate aldolase B [Mus musculus] >gi|30172916|sp|Q91Y97.3|ALDOB_MOUSE RecName: Full=Fructose-bisphosphate aldolase B; AltName: Full=Aldolase 2; AltName: Full=Liver-type aldolase >gi|16741179|gb|AAH16435.1| Aldolase B, fructose-bisphosphate [Mus musculus] >gi|18381050|gb|AAH22113.1| Aldolase B, fructose-bisphosphate [Mus musculus] >gi|18848233|gb|AAH24112.1| Aldolase B, fructose-bis…	sp|Q91Y97|ALDOB_MOUSE	Fructose-bisphosphate aldolase B OS=Mus musculus GN=Aldob PE=1 SV=3	COG3588	330	Carbohydrate transport and metabolism ;	Fructose-1,6-bisphosphate aldolase	mmu:230163	Aldob, Aldo-2, Aldo2, BC016435; aldolase B, fructose-bisphosphate; K01623 fructose-bisphosphate aldolase, class I [EC:4.1.2.13]	GO:0043200 response to amino acid | GO:0009750 response to fructose | GO:0032869 cellular response to insulin stimulus | GO:0061624 fructose catabolic process to hydroxyacetone phosphate and glyceraldehyde-3-phosphate | GO:0070072 vacuolar proton-transporting V-type ATPase complex assembly | GO:0030388 fructose 1,6-bisphosphate metabolic process | GO:0051384 response to glucocorticoid | GO:001004…	GO:0061609 fructose-1-phosphate aldolase activity | GO:0008092 cytoskeletal protein binding | GO:0051117 ATPase binding | GO:0031210 phosphatidylcholine binding | GO:0042802 identical protein binding | GO:0070061 fructose binding | GO:0004332 fructose-bisphosphate aldolase activity	GO:0005764 lysosome | GO:0005829 cytosol | GO:0034451 centriolar satellite | GO:0030867 rough endoplasmic reticulum membrane | GO:0048471 perinuclear region of cytoplasm | GO:0070062 extracellular exosome | GO:0005886 plasma membrane | GO:0005634 nucleus | GO:0030868 smooth endoplasmic reticulum membrane	PF00274.16 Glycolytic	IPR000741 Fructose-bisphosphate aldolase, class-I | IPR013785 Aldolase-type TIM barrel | IPR029768 Fructose-bisphosphate aldolase class-I active site
ENSMUSG00000041616	0	28	7.83606	Up	0.000470091	ENSMUST00000103230	Nppa	protein_coding	natriuretic peptide type A [Source:MGI Symbol;Acc:MGI:97367]	ENSMUSP00000099520	gi|59797056|ref|NP_032751.1|	natriuretic peptides A preproprotein [Mus musculus] >gi|408359960|sp|P05125.2|ANF_MOUSE RecName: Full=Natriuretic peptides A; AltName: Full=Prepronatriodilatin; Contains: RecName: Full=Atrial natriuretic factor; Short=ANF; AltName: Full=Atrial natriuretic peptide; Short=ANP; Contains: RecName: Full=Auriculin-B; Contains: RecName: Full=Auriculin-A; Contains: RecName: Full=Atriopeptin-1; AltName: F…	sp|P05125|ANF_MOUSE	Natriuretic peptides A OS=Mus musculus GN=Nppa PE=1 SV=2	--	--	--	--	mmu:230899	Nppa, ANP, Anf, Pnd; natriuretic peptide type A; K12334 natriuretic peptide A	GO:0007218 neuropeptide signaling pathway | GO:0007168 receptor guanylyl cyclase signaling pathway | GO:0060372 regulation of atrial cardiac muscle cell membrane repolarization | GO:1902514 regulation of calcium ion transmembrane transport via high voltage-gated calcium channel | GO:0032868 response to insulin | GO:0061049 cell growth involved in cardiac muscle cell development | GO:0001666 respo…	GO:0051428 peptide hormone receptor binding | GO:0005184 neuropeptide hormone activity | GO:0071855 neuropeptide receptor binding	GO:0005615 extracellular space | GO:0048471 perinuclear region of cytoplasm | GO:0042629 mast cell granule | GO:0005634 nucleus	PF00212.15 ANP	IPR000663 Natriuretic peptide | IPR002407 Natriuretic peptide, atrial type | IPR030480 Natriuretic peptide, conserved site
ENSMUSG00000073805	23	2	-3.40093	Down	0.0398288	ENSMUST00000210055;ENSMUST00000171394;ENSMUST00000210826	Insyn2a	protein_coding	inhibitory synaptic factor 2A [Source:MGI Symbol;Acc:MGI:3605068]	ENSMUSP00000129222	gi|219689092|ref|NP_001137274.1|	protein FAM196A [Mus musculus]	sp|Q3USH1|F196A_MOUSE	Protein FAM196A OS=Mus musculus GN=Fam196a PE=1 SV=1	--	--	--	--	--	--	--	--	--	PF15265.3 FAM196	IPR029337 FAM196 family
ENSMUSG00000060981	4989	1364	-1.8264	Down	0.0045753	ENSMUST00000102972	H4c8	protein_coding	H4 clustered histone 8 [Source:MGI Symbol;Acc:MGI:2448427]	ENSMUSP00000100037	gi|1007715256|ref|XP_015799297.1|	PREDICTED: histone H4-like [Nothobranchius furzeri]	sp|Q28DR4|H4_XENTR	Histone H4 OS=Xenopus tropicalis GN=TGas006m08.1 PE=3 SV=1	COG2036	162	Chromatin structure and dynamics ;	Histones H3 and H4	cmk:103172236	histone H4; K11254 histone H4	GO:0000278 mitotic cell cycle | GO:0031047 gene silencing by RNA | GO:0045815 positive regulation of gene expression, epigenetic | GO:0000183 chromatin silencing at rDNA | GO:0000724 double-strand break repair via homologous recombination | GO:1904837 beta-catenin-TCF complex assembly | GO:0006303 double-strand break repair via nonhomologous end joining | GO:0051290 protein heterotetramerization …	GO:0035575 histone demethylase activity (H4-K20 specific) | GO:0042393 histone binding | GO:0044822 poly(A) RNA binding | GO:0046982 protein heterodimerization activity | GO:0019904 protein domain specific binding | GO:0003677 DNA binding	GO:0005654 nucleoplasm | GO:0016020 membrane | GO:0000784 nuclear chromosome, telomeric region | GO:0000786 nucleosome | GO:0070062 extracellular exosome	PF15511.3 CENP-T_C	IPR001951 Histone H4 | IPR004823 TATA box binding protein associated factor (TAF) | IPR009072 Histone-fold | IPR019809 Histone H4, conserved site
ENSMUSG00000032315	119	354	1.61617	Up	0.0366202	ENSMUST00000216433;ENSMUST00000034865	Cyp1a1	protein_coding	cytochrome P450, family 1, subfamily a, polypeptide 1 [Source:MGI Symbol;Acc:MGI:88588]	ENSMUSP00000150277,ENSMUSP00000034865	gi|6753564|ref|NP_034122.1|	cytochrome P450 1A1 [Mus musculus] >gi|209862925|ref|NP_001129531.1| cytochrome P450 1A1 [Mus musculus] >gi|1352182|sp|P00184.2|CP1A1_MOUSE RecName: Full=Cytochrome P450 1A1; AltName: Full=CYPIA1; AltName: Full=Cytochrome P450-P1 >gi|387138|gb|AAA37507.1| cytochrome P1-450, partial [Mus musculus] >gi|1877232|emb|CAA25836.1| cytochrome P1-450 [Mus musculus] >gi|116138298|gb|AAI25441.1| Cytochrome …	sp|P00184|CP1A1_MOUSE	Cytochrome P450 1A1 OS=Mus musculus GN=Cyp1a1 PE=1 SV=2	COG2124	123	Secondary metabolites biosynthesis, transport and catabolism ;	Cytochrome P450	mmu:13076	Cyp1a1, AHH, AHRR, CP11, Cyp1a2, P450-1; cytochrome P450, family 1, subfamily a, polypeptide 1; K07408 cytochrome P450 family 1 subfamily A polypeptide 1 [EC:1.14.14.1]	GO:0009615 response to virus | GO:0030324 lung development | GO:0032496 response to lipopolysaccharide | GO:0009611 response to wounding | GO:0060137 maternal process involved in parturition | GO:0032094 response to food | GO:1900087 positive regulation of G1/S transition of mitotic cell cycle | GO:0046677 response to antibiotic | GO:0071615 oxidative deethylation | GO:0043010 camera-type eye dev…	GO:0016679 oxidoreductase activity, acting on diphenols and related substances as donors | GO:0016711 flavonoid 3'-monooxygenase activity | GO:0034875 caffeine oxidase activity | GO:0070330 aromatase activity | GO:0020037 heme binding | GO:0008395 steroid hydroxylase activity | GO:0032451 demethylase activity | GO:0005506 iron ion binding | GO:0019899 enzyme binding | GO:0070576 vitamin D 24-hydr…	GO:0005789 endoplasmic reticulum membrane | GO:0031966 mitochondrial membrane	PF00067.19 p450	IPR001128 Cytochrome P450 | IPR002401 Cytochrome P450, E-class, group I | IPR008066 Cytochrome P450, E-class, group I, CYP1 | IPR017972 Cytochrome P450, conserved site
ENSMUSG00000017344	0	20	7.35316	Up	0.00670455	ENSMUST00000128479;ENSMUST00000017488;ENSMUST00000146997;ENSMUST00000153628	Vtn	protein_coding	vitronectin [Source:MGI Symbol;Acc:MGI:98940]	ENSMUSP00000017488	gi|6755987|ref|NP_035837.1|	vitronectin precursor [Mus musculus] >gi|1722806|sp|P29788.2|VTNC_MOUSE RecName: Full=Vitronectin; Short=VN; AltName: Full=S-protein; AltName: Full=Serum-spreading factor; Flags: Precursor >gi|441466|emb|CAA50981.1| vitronectin [Mus musculus] >gi|1730479|emb|CAA44732.1| vitronectin; complement S-protein [Mus musculus] >gi|148683635|gb|EDL15582.1| vitronectin, isoform CRA_c [Mus musculus]	sp|P29788|VTNC_MOUSE	Vitronectin OS=Mus musculus GN=Vtn PE=1 SV=2	--	--	--	--	mmu:22370	Vtn, AI256434, Vn; vitronectin; K06251 vitronectin	GO:0097421 liver regeneration | GO:0048709 oligodendrocyte differentiation | GO:0032092 positive regulation of protein binding | GO:0033627 cell adhesion mediated by integrin | GO:0010951 negative regulation of endopeptidase activity | GO:0030198 extracellular matrix organization | GO:0006955 immune response | GO:0061302 smooth muscle cell-matrix adhesion | GO:0035987 endodermal cell differentiat…	GO:0005178 integrin binding | GO:0050840 extracellular matrix binding | GO:0030247 polysaccharide binding | GO:0005044 scavenger receptor activity | GO:0008201 heparin binding | GO:0042802 identical protein binding | GO:0005518 collagen binding	GO:0072562 blood microparticle | GO:0005604 basement membrane | GO:0048237 rough endoplasmic reticulum lumen | GO:0005796 Golgi lumen | GO:0070062 extracellular exosome	PF01033.14 Somatomedin_B	IPR000585 Hemopexin-like domain | IPR001212 Somatomedin B domain | IPR018486 Hemopexin, conserved site | IPR018487 Hemopexin-like repeats | IPR020436 Somatomedin B, chordata
ENSMUSG00000049539	1414	388	-1.82091	Down	0.00542559	ENSMUST00000055770	H1f1	protein_coding	H1.1 linker histone, cluster member [Source:MGI Symbol;Acc:MGI:1931523]	ENSMUSP00000062030	gi|21426823|ref|NP_085112.1|	histone H1.1 [Mus musculus] >gi|1170153|sp|P43275.2|H11_MOUSE RecName: Full=Histone H1.1; AltName: Full=H1 VAR.3; AltName: Full=Histone H1a; Short=H1a >gi|418022|gb|AAA37761.1| histone H1 [Mus musculus domesticus] >gi|2292938|emb|CAA72969.1| Histone H1.1 [Mus musculus] >gi|27372631|gb|AAO06214.1| histone protein Hist1h1a [Mus musculus] >gi|109733496|gb|AAI16851.1| Histone cluster 1, H1a [Mus musc…	sp|P43275|H11_MOUSE	Histone H1.1 OS=Mus musculus GN=Hist1h1a PE=1 SV=2	--	--	--	--	mmu:80838	Hist1h1a, H1.1, H1a, H1f1, H1var3; histone cluster 1, H1a; K11275 histone H1/5	GO:0007283 spermatogenesis | GO:0006334 nucleosome assembly	GO:0005515 protein binding | GO:0031490 chromatin DNA binding	GO:0000786 nucleosome | GO:0005719 nuclear euchromatin	PF00538.16 Linker_histone	IPR005818 Linker histone H1/H5, domain H15 | IPR005819 Histone H5 | IPR011991 Winged helix-turn-helix DNA-binding domain
ENSMUSG00000071679	35	3	-3.44712	Down	0.00542559	ENSMUST00000112843;ENSMUST00000096301	Rtl4	protein_coding	retrotransposon Gag like 4 [Source:MGI Symbol;Acc:MGI:3588192]	ENSMUSP00000108462,ENSMUSP00000108463	gi|124486592|ref|NP_001028967.2|	zinc finger CCHC domain-containing protein 16 [Mus musculus] >gi|118597344|sp|Q3URY0.1|ZCH16_MOUSE RecName: Full=Zinc finger CCHC domain-containing protein 16; AltName: Full=Mammalian retrotransposon-derived protein 4; AltName: Full=Sushi-XF2b protein >gi|80751096|tpe|CAI99163.1| TPA: gag-like protein [Mus musculus] >gi|187952101|gb|AAI38960.1| Zinc finger, CCHC domain containing 16 [Mus musculus…	sp|Q3URY0|ZCH16_MOUSE	Zinc finger CCHC domain-containing protein 16 OS=Mus musculus GN=Zcchc16 PE=2 SV=1	--	--	--	--	--	--	--	GO:0008270 zinc ion binding | GO:0003676 nucleic acid binding	--	--	IPR001878 Zinc finger, CCHC-type | IPR032567 LDOC1-related
ENSMUSG00000062981	642	181	-1.78147	Down	0.00923342	ENSMUST00000219019;ENSMUST00000075829;ENSMUST00000218893;ENSMUST00000217777;ENSMUST00000218996	Mrpl42	protein_coding	mitochondrial ribosomal protein L42 [Source:MGI Symbol;Acc:MGI:1333774]	ENSMUSP00000151613,ENSMUSP00000075226,ENSMUSP00000151636,ENSMUSP00000151315	gi|13385564|ref|NP_080341.1|	39S ribosomal protein L42, mitochondrial precursor [Mus musculus] >gi|24212380|sp|Q9CPV3.1|RM42_MOUSE RecName: Full=39S ribosomal protein L42, mitochondrial; Short=L42mt; Short=MRP-L42; AltName: Full=28S ribosomal protein S32, mitochondrial; Short=MRP-S32; Short=S32mt; AltName: Full=39S ribosomal protein L31, mitochondrial; Short=L31mt; Short=MRP-L31; Flags: Precursor >gi|19353348|gb|AAH24337.1| …	sp|Q9CPV3|RM42_MOUSE	39S ribosomal protein L42, mitochondrial OS=Mus musculus GN=Mrpl42 PE=1 SV=1	--	--	--	--	mmu:67270	Mrpl42, 2700009F22Rik, 2900055D03Rik, D10Ertd322e, HSPC204, L31mt, MRP-L31, PTD007, Rpml31; mitochondrial ribosomal protein L42; K17423 large subunit ribosomal protein L42	--	GO:0044822 poly(A) RNA binding	GO:0005763 mitochondrial small ribosomal subunit | GO:0005886 plasma membrane	PF10210.6 MRP-S32	IPR019346 Ribosomal protein S32, mitochondrial
ENSMUSG00000064288	3829	698	-2.41105	Down	2.00151e-05	ENSMUST00000102983	H4c12	protein_coding	H4 clustered histone 12 [Source:MGI Symbol;Acc:MGI:2448439]	ENSMUSP00000100048	gi|1007715256|ref|XP_015799297.1|	PREDICTED: histone H4-like [Nothobranchius furzeri]	sp|Q28DR4|H4_XENTR	Histone H4 OS=Xenopus tropicalis GN=TGas006m08.1 PE=3 SV=1	COG2036	162	Chromatin structure and dynamics ;	Histones H3 and H4	cmk:103172236	histone H4; K11254 histone H4	GO:0000278 mitotic cell cycle | GO:0031047 gene silencing by RNA | GO:0045815 positive regulation of gene expression, epigenetic | GO:0000183 chromatin silencing at rDNA | GO:0000724 double-strand break repair via homologous recombination | GO:1904837 beta-catenin-TCF complex assembly | GO:0006303 double-strand break repair via nonhomologous end joining | GO:0051290 protein heterotetramerization …	GO:0035575 histone demethylase activity (H4-K20 specific) | GO:0042393 histone binding | GO:0044822 poly(A) RNA binding | GO:0046982 protein heterodimerization activity | GO:0019904 protein domain specific binding | GO:0003677 DNA binding	GO:0005654 nucleoplasm | GO:0016020 membrane | GO:0000784 nuclear chromosome, telomeric region | GO:0000786 nucleosome | GO:0070062 extracellular exosome	PF15511.3 CENP-T_C	IPR001951 Histone H4 | IPR004823 TATA box binding protein associated factor (TAF) | IPR009072 Histone-fold | IPR019809 Histone H4, conserved site
ENSMUSG00000029334	998	2731	1.49662	Up	0.0431803	ENSMUST00000161490;ENSMUST00000162619;ENSMUST00000162147;ENSMUST00000031277;ENSMUST00000160765	Prkg2	protein_coding	protein kinase, cGMP-dependent, type II [Source:MGI Symbol;Acc:MGI:108173]	ENSMUSP00000124963,ENSMUSP00000142743,ENSMUSP00000143708,ENSMUSP00000031277	gi|188219585|ref|NP_032952.3|	cGMP-dependent protein kinase 2 [Mus musculus] >gi|86577812|gb|AAI13206.1| Protein kinase, cGMP-dependent, type II [Mus musculus]	sp|Q61410|KGP2_MOUSE	cGMP-dependent protein kinase 2 OS=Mus musculus GN=Prkg2 PE=1 SV=1	--	--	--	--	mmu:19092	Prkg2, AW212535, CGKII, Prkgr2, cGK-II; protein kinase, cGMP-dependent, type II; K19477 cGMP-dependent protein kinase 2 [EC:2.7.11.12]	GO:0072661 protein targeting to plasma membrane | GO:0036289 peptidyl-serine autophosphorylation | GO:0032922 circadian regulation of gene expression	GO:0004692 cGMP-dependent protein kinase activity | GO:0005524 ATP binding | GO:0042803 protein homodimerization activity | GO:0030553 cGMP binding	GO:0031965 nuclear membrane | GO:0016324 apical plasma membrane	PF00027.26 cNMP_binding	IPR000595 Cyclic nucleotide-binding domain | IPR000719 Protein kinase domain | IPR000961 AGC-kinase, C-terminal | IPR002374 cGMP-dependent kinase | IPR008271 Serine/threonine-protein kinase, active site | IPR011009 Protein kinase-like domain | IPR014710 RmlC-like jelly roll fold | IPR017441 Protein kinase, ATP binding site | IPR018488 Cyclic nucleotide-binding, conserved site | IPR018490 Cyclic n…
ENSMUSG00000002100	0	17	7.12025	Up	0.0183814	ENSMUST00000137942;ENSMUST00000111430;ENSMUST00000169776	Mybpc3	protein_coding	myosin binding protein C, cardiac [Source:MGI Symbol;Acc:MGI:102844]	ENSMUSP00000119994,ENSMUSP00000107058,ENSMUSP00000127070	gi|134031947|ref|NP_032679.2|	myosin-binding protein C, cardiac-type [Mus musculus]	sp|O70468|MYPC3_MOUSE	Myosin-binding protein C, cardiac-type OS=Mus musculus GN=Mybpc3 PE=1 SV=1	--	--	--	--	mmu:17868	Mybpc3; myosin binding protein C, cardiac; K12568 myosin-binding protein C, cardiac-type	GO:0002027 regulation of heart rate | GO:0055010 ventricular cardiac muscle tissue morphogenesis | GO:0045214 sarcomere organization | GO:0031034 myosin filament assembly | GO:0007155 cell adhesion | GO:0060048 cardiac muscle contraction	GO:0008307 structural constituent of muscle | GO:0046872 metal ion binding | GO:0042802 identical protein binding | GO:0032036 myosin heavy chain binding | GO:0003779 actin binding | GO:0005200 structural constituent of cytoskeleton	GO:0031672 A band | GO:0005863 striated muscle myosin thick filament	PF07679.13 I-set	IPR003598 Immunoglobulin subtype 2 | IPR003599 Immunoglobulin subtype | IPR003961 Fibronectin type III | IPR007110 Immunoglobulin-like domain | IPR013098 Immunoglobulin I-set | IPR013783 Immunoglobulin-like fold
ENSMUSG00000072647	59	13	-2.12729	Down	0.0393433	ENSMUST00000100757;ENSMUST00000200170	Adam1a	protein_coding	a disintegrin and metallopeptidase domain 1a [Source:MGI Symbol;Acc:MGI:2429504]	ENSMUSP00000098320,ENSMUSP00000143668	gi|31559889|ref|NP_742124.2|	disintegrin and metalloproteinase domain-containing protein 1a precursor [Mus musculus] >gi|37076932|sp|Q60813.3|ADM1A_MOUSE RecName: Full=Disintegrin and metalloproteinase domain-containing protein 1a; Short=ADAM 1a; AltName: Full=Fertilin subunit alpha-a; Flags: Precursor >gi|30354750|gb|AAH52093.1| A disintegrin and metallopeptidase domain 1a [Mus musculus]	sp|Q60813|ADM1A_MOUSE	Disintegrin and metalloproteinase domain-containing protein 1a OS=Mus musculus GN=Adam1a PE=2 SV=3	--	--	--	--	mmu:280668	Adam1a, Adam1, Ftna; a disintegrin and metallopeptidase domain 1a; K08607 disintegrin and metalloproteinase domain-containing protein 1 [EC:3.4.24.-]	GO:0008584 male gonad development | GO:0006508 proteolysis | GO:0007339 binding of sperm to zona pellucida | GO:0007342 fusion of sperm to egg plasma membrane	GO:0008270 zinc ion binding | GO:0004222 metalloendopeptidase activity | GO:0005515 protein binding	GO:0016021 integral component of membrane | GO:0045121 membrane raft	PF01562.16 Pep_M12B_propep	IPR000742 EGF-like domain | IPR001590 Peptidase M12B, ADAM/reprolysin | IPR001762 Disintegrin domain | IPR002870 Peptidase M12B, propeptide | IPR006586 ADAM, cysteine-rich | IPR013032 EGF-like, conserved site | IPR018358 Disintegrin, conserved site | IPR024079 Metallopeptidase, catalytic domain
ENSMUSG00000033491	61	13	-2.17529	Down	0.031244	ENSMUST00000179574;ENSMUST00000036426	Prss35	protein_coding	protease, serine 35 [Source:MGI Symbol;Acc:MGI:2444800]	ENSMUSP00000035271,ENSMUSP00000137445	gi|148694560|gb|EDL26507.1|	protease, serine, 35, isoform CRA_b, partial [Mus musculus]	sp|Q8C0F9|PRS35_MOUSE	Inactive serine protease 35 OS=Mus musculus GN=Prss35 PE=2 SV=1	COG3591	50.4	Amino acid transport and metabolism ;	V8-like Glu-specific endopeptidase	lcm:102351756	PRSS23; protease, serine 23; K09627 serine protease 23 [EC:3.4.21.-]	GO:0006508 proteolysis	GO:0004252 serine-type endopeptidase activity	GO:0005576 extracellular region | GO:0005739 mitochondrion	PF00089.23 Trypsin	IPR001254 Serine proteases, trypsin domain | IPR009003 Peptidase S1, PA clan | IPR018114 Serine proteases, trypsin family, histidine active site
ENSMUSG00000048191	23	1	-4.31963	Down	0.0129621	ENSMUST00000189314;ENSMUST00000062451;ENSMUST00000190907	Muc6	protein_coding	mucin 6, gastric [Source:MGI Symbol;Acc:MGI:2663233]	ENSMUSP00000140388,ENSMUSP00000140483,ENSMUSP00000049941	gi|148686172|gb|EDL18119.1|	mucin 6, gastric [Mus musculus]	sp|Q80T03|MUC6_MOUSE	Mucin-6 OS=Mus musculus GN=Muc6 PE=2 SV=1	--	--	--	--	bacu:103020461	MUC5AC; mucin 5AC, oligomeric mucus/gel-forming; K21125 mucin-5AC	GO:0030277 maintenance of gastrointestinal epithelium	--	GO:0005576 extracellular region	PF00094.22 VWD	--
ENSMUSG00000050069	107	506	2.28458	Up	0.000212077	ENSMUST00000055294	Grem2	protein_coding	gremlin 2, DAN family BMP antagonist [Source:MGI Symbol;Acc:MGI:1344367]	ENSMUSP00000049640	gi|537163504|gb|ERE73307.1|	gremlin-2-like protein [Cricetulus griseus]	sp|O88273|GREM2_MOUSE	Gremlin-2 OS=Mus musculus GN=Grem2 PE=1 SV=1	--	--	--	--	xma:102234654	nbl1; neuroblastoma 1, DAN family BMP antagonist; K19558 neuroblastoma suppressor of tumorigenicity 1	GO:0019221 cytokine-mediated signaling pathway | GO:0038098 sequestering of BMP from receptor via BMP binding | GO:0060300 regulation of cytokine activity | GO:0048263 determination of dorsal identity | GO:0010172 embryonic body morphogenesis	GO:0036122 BMP binding | GO:0005125 cytokine activity | GO:0008201 heparin binding | GO:0042803 protein homodimerization activity	GO:0005615 extracellular space	PF03045.12 DAN	--
ENSMUSG00000071415	11557	3633	-1.62508	Down	0.018271	ENSMUST00000103146;ENSMUST00000151118;ENSMUST00000150955;ENSMUST00000151965;ENSMUST00000128801	Rpl23	protein_coding	ribosomal protein L23 [Source:MGI Symbol;Acc:MGI:1929455]	ENSMUSP00000099435,ENSMUSP00000117316	gi|635092783|ref|XP_008011089.1|	PREDICTED: 60S ribosomal protein L23 [Chlorocebus sabaeus]	sp|P62832|RL23_RAT	60S ribosomal protein L23 OS=Rattus norvegicus GN=Rpl23 PE=2 SV=1	COG0093	230	Translation, ribosomal structure and biogenesis ;	Ribosomal protein L14	amj:102570589	RPL23; ribosomal protein L23; K02894 large subunit ribosomal protein L23e	GO:0000184 nuclear-transcribed mRNA catabolic process, nonsense-mediated decay | GO:0006415 translational termination | GO:0006413 translational initiation | GO:0016259 selenocysteine metabolic process | GO:0006414 translational elongation | GO:0006610 ribosomal protein import into nucleus | GO:0019083 viral transcription | GO:0006614 SRP-dependent cotranslational protein targeting to membrane | …	GO:0005515 protein binding | GO:0044822 poly(A) RNA binding | GO:0070180 large ribosomal subunit rRNA binding | GO:0003735 structural constituent of ribosome	GO:0005925 focal adhesion | GO:0016020 membrane | GO:0022625 cytosolic large ribosomal subunit | GO:0005730 nucleolus | GO:0070062 extracellular exosome	PF00238.16 Ribosomal_L14	--
ENSMUSG00000029830	16	0	-6.98936	Down	0.0266183	ENSMUST00000096040;ENSMUST00000172585;ENSMUST00000173428;ENSMUST00000200796;ENSMUST00000040486	Svopl	protein_coding	SV2 related protein homolog (rat)-like [Source:MGI Symbol;Acc:MGI:2444335]	ENSMUSP00000093743,ENSMUSP00000133326	gi|37590471|gb|AAH58741.1|	Svopl protein [Mus musculus] >gi|148681700|gb|EDL13647.1| RIKEN cDNA 9430071P14 [Mus musculus]	sp|Q6PDF3|SVOPL_MOUSE	Putative transporter SVOPL OS=Mus musculus GN=Svopl PE=2 SV=1	COG0477	150	Carbohydrate transport and metabolism ; Amino acid transport and metabolism ; Inorganic ion transport and metabolism ; General function prediction only ;	Permeases of the major facilitator superfamily	tad:TRIADDRAFT_36521	hypothetical protein; K06258 MFS transporter, VNT family, synaptic vesicle glycoprotein 2	GO:0055085 transmembrane transport	GO:0022891 substrate-specific transmembrane transporter activity	GO:0016021 integral component of membrane	PF07690.13 MFS_1	IPR011701 Major facilitator superfamily | IPR020846 Major facilitator superfamily domain
ENSMUSG00000023089	238	20	-3.52039	Down	3.47341e-08	ENSMUST00000132588;ENSMUST00000118558;ENSMUST00000023851;ENSMUST00000141274	Ndufa5	protein_coding	NADH:ubiquinone oxidoreductase subunit A5 [Source:MGI Symbol;Acc:MGI:1915452]	ENSMUSP00000112971,ENSMUSP00000023851	gi|13386100|ref|NP_080890.1|	NADH dehydrogenase [ubiquinone] 1 alpha subcomplex subunit 5 isoform 1 [Mus musculus] >gi|32363395|sp|Q9CPP6.3|NDUA5_MOUSE RecName: Full=NADH dehydrogenase [ubiquinone] 1 alpha subcomplex subunit 5; AltName: Full=Complex I subunit B13; AltName: Full=Complex I-13kD-B; Short=CI-13kD-B; AltName: Full=NADH-ubiquinone oxidoreductase 13 kDa-B subunit >gi|20306389|gb|AAH28633.1| NADH dehydrogenase (ubiq…	sp|Q9CPP6|NDUA5_MOUSE	NADH dehydrogenase [ubiquinone] 1 alpha subcomplex subunit 5 OS=Mus musculus GN=Ndufa5 PE=1 SV=3	--	--	--	--	rno:25488	Ndufa5, NADHUO; NADH:ubiquinone oxidoreductase subunit A5; K03949 NADH dehydrogenase (ubiquinone) 1 alpha subcomplex subunit 5	GO:0006810 transport | GO:0022904 respiratory electron transport chain	GO:0008137 NADH dehydrogenase (ubiquinone) activity	GO:0005747 mitochondrial respiratory chain complex I	PF04716.11 ETC_C1_NDUFA5	IPR006806 ETC complex I subunit
ENSMUSG00000032487	17648	47766	1.48089	Up	0.0445592	ENSMUST00000035065;ENSMUST00000190784	Ptgs2	protein_coding	prostaglandin-endoperoxide synthase 2 [Source:MGI Symbol;Acc:MGI:97798]	ENSMUSP00000035065,ENSMUSP00000139904	gi|31981525|ref|NP_035328.2|	prostaglandin G/H synthase 2 precursor [Mus musculus] >gi|548483|sp|Q05769.1|PGH2_MOUSE RecName: Full=Prostaglandin G/H synthase 2; AltName: Full=Cyclooxygenase-2; Short=COX-2; AltName: Full=Glucocorticoid-regulated inflammatory cyclooxygenase; AltName: Full=Gripghs; AltName: Full=Macrophage activation-associated marker protein P71/73; AltName: Full=PES-2; AltName: Full=PHS II; AltName: Full=Pros…	sp|Q05769|PGH2_MOUSE	Prostaglandin G/H synthase 2 OS=Mus musculus GN=Ptgs2 PE=1 SV=1	--	--	--	--	mmu:19225	Ptgs2, COX2, Cox-2, PES-2, PGHS-2, PHS_II, PHS-2, Pghs2, TIS10, gripghs; prostaglandin-endoperoxide synthase 2; K11987 prostaglandin-endoperoxide synthase 2 [EC:1.14.99.1]	GO:0043065 positive regulation of apoptotic process | GO:0042640 anagen | GO:0045986 negative regulation of smooth muscle contraction | GO:0031622 positive regulation of fever generation | GO:0030282 bone mineralization | GO:0045429 positive regulation of nitric oxide biosynthetic process | GO:0042346 positive regulation of NF-kappaB import into nucleus | GO:0090271 positive regulation of fibrobl…	GO:0004601 peroxidase activity | GO:0042803 protein homodimerization activity | GO:0008289 lipid binding | GO:0046872 metal ion binding | GO:0020037 heme binding | GO:0004666 prostaglandin-endoperoxide synthase activity | GO:0016702 oxidoreductase activity, acting on single donors with incorporation of molecular oxygen, incorporation of two atoms of oxygen | GO:0019899 enzyme binding	GO:0043005 neuron projection | GO:0005901 caveola | GO:0005783 endoplasmic reticulum | GO:0043234 protein complex | GO:0005634 nucleus	PF00008.24 EGF	IPR000742 EGF-like domain | IPR010255 Haem peroxidase | IPR019791 Haem peroxidase, animal | IPR029576 Prostaglandin G/H synthase 2
ENSMUSG00000054312	667	177	-1.86879	Down	0.00538855	ENSMUST00000067298;ENSMUST00000072587;ENSMUST00000132515;ENSMUST00000142437	Mrps21	protein_coding	mitochondrial ribosomal protein S21 [Source:MGI Symbol;Acc:MGI:1913542]	ENSMUSP00000066990,ENSMUSP00000117821,ENSMUSP00000130403	gi|17505220|ref|NP_510964.1|	28S ribosomal protein S21, mitochondrial [Mus musculus] >gi|13959545|sp|P58059.1|RT21_MOUSE RecName: Full=28S ribosomal protein S21, mitochondrial; Short=MRP-S21; Short=S21mt >gi|13620913|dbj|BAB41009.1| mitochondrial ribosomal protein S21 [Mus musculus] >gi|20381481|gb|AAH27546.1| Mitochondrial ribosomal protein S21 [Mus musculus] >gi|116138616|gb|AAI25659.1| Mitochondrial ribosomal protein S21 …	sp|P58059|RT21_MOUSE	28S ribosomal protein S21, mitochondrial OS=Mus musculus GN=Mrps21 PE=1 SV=1	--	--	--	--	mmu:66292	Mrps21, 1810031B19Rik; mitochondrial ribosomal protein S21; K02970 small subunit ribosomal protein S21	GO:0032543 mitochondrial translation	GO:0003735 structural constituent of ribosome | GO:0044822 poly(A) RNA binding	GO:0005743 mitochondrial inner membrane | GO:0005763 mitochondrial small ribosomal subunit	PF01165.17 Ribosomal_S21	IPR001911 Ribosomal protein S21
ENSMUSG00000109398	39	4	-3.20195	Down	0.00696332	ENSMUST00000207173;ENSMUST00000208865	Gm3854	protein_coding	predicted gene 3854 [Source:MGI Symbol;Acc:MGI:3782026]	ENSMUSP00000148053	gi|589962137|ref|XP_006993629.1|	PREDICTED: zinc finger protein 582 isoform X1 [Peromyscus maniculatus bairdii] >gi|1008793707|ref|XP_015842552.1| PREDICTED: zinc finger protein 582 isoform X1 [Peromyscus maniculatus bairdii]	sp|Q96NG8|ZN582_HUMAN	Zinc finger protein 582 OS=Homo sapiens GN=ZNF582 PE=2 SV=1	COG5048	90.9	General function prediction only ;	FOG: Zn-finger	rno:102548162	zinc finger protein 582-like; K09228 KRAB domain-containing zinc finger protein	--	--	--	PF01352.24 KRAB	IPR001909 Krueppel-associated box | IPR007087 Zinc finger, C2H2 | IPR013087 Zinc finger C2H2-type/integrase DNA-binding domain | IPR015880 Zinc finger, C2H2-like
ENSMUSG00000021552	185	54	-1.72978	Down	0.0352917	ENSMUST00000091579;ENSMUST00000225098;ENSMUST00000224273;ENSMUST00000224114;ENSMUST00000224505;ENSMUST00000225034;ENSMUST00000223811	Gkap1	protein_coding	G kinase anchoring protein 1 [Source:MGI Symbol;Acc:MGI:1891694]	ENSMUSP00000089169,ENSMUSP00000153655,ENSMUSP00000153405,ENSMUSP00000153571,ENSMUSP00000153234	gi|148709309|gb|EDL41255.1|	mCG6891, isoform CRA_a, partial [Mus musculus]	sp|Q9JMB0|GKAP1_MOUSE	G kinase-anchoring protein 1 OS=Mus musculus GN=Gkap1 PE=1 SV=1	--	--	--	--	--	--	GO:0007199 G-protein coupled receptor signaling pathway coupled to cGMP nucleotide second messenger	GO:0005515 protein binding	GO:0005794 Golgi apparatus	--	--
ENSMUSG00000024446	560	128	-2.08381	Down	0.00116988	ENSMUST00000077535;ENSMUST00000173486;ENSMUST00000025319;ENSMUST00000173122;ENSMUST00000172573;ENSMUST00000174824	Rpp21	protein_coding	ribonuclease P 21 subunit [Source:MGI Symbol;Acc:MGI:1914926]	ENSMUSP00000076739,ENSMUSP00000025319,ENSMUSP00000133400	gi|13385804|ref|NP_080584.1|	ribonuclease P protein subunit p21 [Mus musculus] >gi|52001246|sp|Q8R040.2|RPP21_MOUSE RecName: Full=Ribonuclease P protein subunit p21; Short=RNaseP protein p21; AltName: Full=Ribonucleoprotein V >gi|148691337|gb|EDL23284.1| ribonuclease P 21 subunit (human), isoform CRA_b [Mus musculus]	sp|Q8R040|RPP21_MOUSE	Ribonuclease P protein subunit p21 OS=Mus musculus GN=Rpp21 PE=1 SV=2	COG2023	64.7	Translation, ribosomal structure and biogenesis ;	RNase P subunit RPR2	mmu:67676	Rpp21, 0610037N01Rik; ribonuclease P 21 subunit; K03540 ribonuclease P protein subunit RPR2 [EC:3.1.26.5]	GO:0090502 RNA phosphodiester bond hydrolysis, endonucleolytic | GO:0008033 tRNA processing | GO:0042493 response to drug	GO:0004526 ribonuclease P activity | GO:0046872 metal ion binding	GO:0005655 nucleolar ribonuclease P complex	PF04032.13 Rpr2	--
ENSMUSG00000038112	20	1	-4.11918	Down	0.0316519	ENSMUST00000042485;ENSMUST00000119722;ENSMUST00000147753;ENSMUST00000128054;ENSMUST00000141370;ENSMUST00000136814;ENSMUST00000130829	AW551984	protein_coding	expressed sequence AW551984 [Source:MGI Symbol;Acc:MGI:2143322]	ENSMUSP00000042582,ENSMUSP00000113212,ENSMUSP00000117328,ENSMUSP00000117262	gi|148693542|gb|EDL25489.1|	expressed sequence AW551984, isoform CRA_a, partial [Mus musculus] >gi|148693543|gb|EDL25490.1| expressed sequence AW551984, isoform CRA_a, partial [Mus musculus]	sp|O00534|VMA5A_HUMAN	von Willebrand factor A domain-containing protein 5A OS=Homo sapiens GN=VWA5A PE=2 SV=2	COG2304	116	General function prediction only ;	Uncharacterized protein containing a von Willebrand factor type A (vWA) domain	smm:Smp_073130.3	vacuolar protein sorting 26 vps26; K18466 vacuolar protein sorting-associated protein 26	GO:0060923 cardiac muscle cell fate commitment	--	--	PF08487.7 VIT	IPR002035 von Willebrand factor, type A | IPR013694 VIT domain
ENSMUSG00000098274	15776	1677	-3.18927	Down	1.69322e-09	ENSMUST00000023269;ENSMUST00000137811;ENSMUST00000126419;ENSMUST00000128581	Rpl24	protein_coding	ribosomal protein L24 [Source:MGI Symbol;Acc:MGI:1915443]	ENSMUSP00000023269	gi|28174943|gb|AAH02110.2|	Rpl24 protein, partial [Mus musculus]	sp|P83732|RL24_RAT	60S ribosomal protein L24 OS=Rattus norvegicus GN=Rpl24 PE=2 SV=1	COG2075	143	Translation, ribosomal structure and biogenesis ;	Ribosomal protein L24E	oas:101112181	RPL24; ribosomal protein L24; K02896 large subunit ribosomal protein L24e	GO:0000184 nuclear-transcribed mRNA catabolic process, nonsense-mediated decay | GO:0006415 translational termination | GO:0006413 translational initiation | GO:0021554 optic nerve development | GO:0016259 selenocysteine metabolic process | GO:0000027 ribosomal large subunit assembly | GO:0006414 translational elongation | GO:0060041 retina development in camera-type eye | GO:1902626 assembly of …	GO:0005515 protein binding | GO:0044822 poly(A) RNA binding | GO:0003735 structural constituent of ribosome	GO:0016020 membrane | GO:0022625 cytosolic large ribosomal subunit | GO:0070062 extracellular exosome	PF01246.17 Ribosomal_L24e	--
ENSMUSG00000040747	17	68	2.03629	Up	0.0431455	ENSMUST00000038845	Cd53	protein_coding	CD53 antigen [Source:MGI Symbol;Acc:MGI:88341]	ENSMUSP00000035781	gi|6671712|ref|NP_031677.1|	leukocyte surface antigen CD53 [Mus musculus] >gi|2501222|sp|Q61451.2|CD53_MOUSE RecName: Full=Leukocyte surface antigen CD53; AltName: Full=Cell surface glycoprotein CD53; AltName: CD_antigen=CD53 >gi|1279546|emb|CAA65864.1| CD53 [Mus musculus] >gi|18203955|gb|AAH21310.1| CD53 antigen [Mus musculus] >gi|31127280|gb|AAH52905.1| CD53 antigen [Mus musculus] >gi|148669937|gb|EDL01884.1| CD53 antigen…	sp|Q61451|CD53_MOUSE	Leukocyte surface antigen CD53 OS=Mus musculus GN=Cd53 PE=2 SV=2	--	--	--	--	mmu:12508	Cd53, AI323659, Ox-44, Tspan25; CD53 antigen; K06489 CD53 antigen	GO:0045661 regulation of myoblast differentiation | GO:0016337 single organismal cell-cell adhesion | GO:0007166 cell surface receptor signaling pathway | GO:1901741 positive regulation of myoblast fusion	--	GO:0070062 extracellular exosome | GO:0009986 cell surface | GO:0005887 integral component of plasma membrane | GO:0005911 cell-cell junction | GO:0001772 immunological synapse	PF00335.17 Tetraspannin	IPR000301 Tetraspanin | IPR008952 Tetraspanin, EC2 domain | IPR018499 Tetraspanin/Peripherin | IPR018503 Tetraspanin, conserved site
ENSMUSG00000036181	24454	7461	-1.6682	Down	0.0130322	ENSMUST00000040914	H1f2	protein_coding	H1.2 linker histone, cluster member [Source:MGI Symbol;Acc:MGI:1931526]	ENSMUSP00000045816	gi|9845257|ref|NP_056601.1|	histone H1.2 [Mus musculus] >gi|121905|sp|P15864.2|H12_MOUSE RecName: Full=Histone H1.2; AltName: Full=H1 VAR.1; AltName: Full=H1c >gi|387193|gb|AAA37807.1| histone H1 [Mus musculus] >gi|387194|gb|AAA37808.1| histone H1 [Mus musculus domesticus] >gi|2292940|emb|CAA72970.1| Histone H1.2 [Mus musculus] >gi|27372635|gb|AAO06216.1| histone protein Hist1h1c [Mus musculus] >gi|59808087|gb|AAH89604.1| H…	sp|P15864|H12_MOUSE	Histone H1.2 OS=Mus musculus GN=Hist1h1c PE=1 SV=2	--	--	--	--	mmu:50708	Hist1h1c, 0610008C09Rik, H1.2, H1c, H1f2, H1var1, His1a; histone cluster 1, H1c; K11275 histone H1/5	GO:0098532 histone H3-K27 trimethylation | GO:0000122 negative regulation of transcription from RNA polymerase II promoter | GO:0016584 nucleosome positioning | GO:0080182 histone H3-K4 trimethylation | GO:0006334 nucleosome assembly	GO:0005515 protein binding | GO:0044822 poly(A) RNA binding | GO:0031490 chromatin DNA binding	GO:0005719 nuclear euchromatin | GO:0000786 nucleosome | GO:0035327 transcriptionally active chromatin	PF00538.16 Linker_histone	IPR005818 Linker histone H1/H5, domain H15 | IPR005819 Histone H5 | IPR011991 Winged helix-turn-helix DNA-binding domain
ENSMUSG00000042485	39	6	-2.63142	Down	0.0307029	ENSMUST00000040715	Mustn1	protein_coding	musculoskeletal, embryonic nuclear protein 1 [Source:MGI Symbol;Acc:MGI:1913425]	ENSMUSP00000048427	gi|148692820|gb|EDL24767.1|	musculoskeletal, embryonic nuclear protein 1, partial [Mus musculus]	sp|Q99JI1|MSTN1_MOUSE	Musculoskeletal embryonic nuclear protein 1 OS=Mus musculus GN=Mustn1 PE=1 SV=1	--	--	--	--	--	--	GO:0002062 chondrocyte differentiation | GO:0030326 embryonic limb morphogenesis | GO:0042246 tissue regeneration | GO:0035988 chondrocyte proliferation	--	GO:0005654 nucleoplasm	PF15682.2 Mustang	IPR031394 Musculoskeletal embryonic nuclear protein 1
ENSMUSG00000028643	120	20	-2.53322	Down	0.000775606	ENSMUST00000030395;ENSMUST00000106345;ENSMUST00000097908;ENSMUST00000210595	Svbp	protein_coding	small vasohibin binding protein [Source:MGI Symbol;Acc:MGI:1916466]	ENSMUSP00000030395,ENSMUSP00000101952,ENSMUSP00000095518,ENSMUSP00000147292	gi|84872229|ref|NP_001034087.1|	small vasohibin-binding protein isoform a [Mus musculus] >gi|148698519|gb|EDL30466.1| coiled-coil domain containing 23, isoform CRA_c [Mus musculus]	sp|Q99LQ4|SVBP_MOUSE	Small vasohibin-binding protein OS=Mus musculus GN=Svbp PE=2 SV=1	--	--	--	--	--	--	GO:0010596 negative regulation of endothelial cell migration | GO:0009306 protein secretion | GO:0031397 negative regulation of protein ubiquitination	--	GO:0005576 extracellular region | GO:0045177 apical part of cell	PF15674.2 CCDC23	IPR031378 Small vasohibin-binding protein
ENSMUSG00000034845	139	32	-2.0703	Down	0.00909669	ENSMUST00000048452	Plvap	protein_coding	plasmalemma vesicle associated protein [Source:MGI Symbol;Acc:MGI:1890497]	ENSMUSP00000035404	gi|255522953|ref|NP_115774.2|	plasmalemma vesicle-associated protein [Mus musculus] >gi|148696982|gb|EDL28929.1| plasmalemma vesicle associated protein [Mus musculus]	sp|Q91VC4|PLVAP_MOUSE	Plasmalemma vesicle-associated protein OS=Mus musculus GN=Plvap PE=1 SV=1	--	--	--	--	mmu:84094	Plvap, MECA32, Pv1; plasmalemma vesicle associated protein; K17309 plasmalemma vesicle-associated protein	GO:0033209 tumor necrosis factor-mediated signaling pathway | GO:0070528 protein kinase C signaling | GO:0002693 positive regulation of cellular extravasation | GO:0000165 MAPK cascade	GO:0042803 protein homodimerization activity	GO:0016021 integral component of membrane | GO:0005901 caveola | GO:0070062 extracellular exosome | GO:0009986 cell surface | GO:0048471 perinuclear region of cytoplasm	PF06637.8 PV-1	IPR009538 PV-1
ENSMUSG00000064341	686	180	-1.88508	Down	0.00474768	ENSMUST00000082392	mt-Nd1	protein_coding	mitochondrially encoded NADH dehydrogenase 1 [Source:MGI Symbol;Acc:MGI:101787]	ENSMUSP00000080991	gi|34538598|ref|NP_904328.1|	NADH dehydrogenase subunit 1 (mitochondrion) [Mus musculus] >gi|62198714|ref|YP_220550.1| NADH dehydrogenase subunit 1 (mitochondrion) [Mus musculus domesticus] >gi|57015344|sp|P03888.3|NU1M_MOUSE RecName: Full=NADH-ubiquinone oxidoreductase chain 1; AltName: Full=NADH dehydrogenase subunit 1 >gi|11320572|dbj|BAA95616.2| NADH dehydrogenase subunit 1 (mitochondrion) [Mus musculus domesticus] >gi|1…	sp|P03888|NU1M_MOUSE	NADH-ubiquinone oxidoreductase chain 1 OS=Mus musculus GN=Mtnd1 PE=1 SV=3	COG1005	293	Energy production and conversion ;	NADH:ubiquinone oxidoreductase subunit 1 (chain H)	mmu:17716	ND1; NADH dehydrogenase subunit 1; K03878 NADH-ubiquinone oxidoreductase chain 1 [EC:1.6.5.3]	GO:0007186 G-protein coupled receptor signaling pathway | GO:0001992 regulation of systemic arterial blood pressure by vasopressin | GO:0010628 positive regulation of gene expression | GO:0035814 negative regulation of renal sodium excretion | GO:2001243 negative regulation of intrinsic apoptotic signaling pathway | GO:1901652 response to peptide | GO:0045907 positive regulation of vasoconstricti…	GO:0005515 protein binding | GO:0005000 vasopressin receptor activity | GO:0008137 NADH dehydrogenase (ubiquinone) activity | GO:0042277 peptide binding	GO:0005887 integral component of plasma membrane | GO:0015629 actin cytoskeleton | GO:0005743 mitochondrial inner membrane | GO:0030425 dendrite | GO:0070469 respiratory chain | GO:0043025 neuronal cell body | GO:0005634 nucleus	PF00146.18 NADHdh	--
ENSMUSG00000074218	26	3	-3.02008	Down	0.0449564	ENSMUST00000098594;ENSMUST00000208441	Cox7a1	protein_coding	cytochrome c oxidase subunit 7A1 [Source:MGI Symbol;Acc:MGI:1316714]	ENSMUSP00000096193,ENSMUSP00000146960	gi|148692095|gb|EDL24042.1|	cytochrome c oxidase, subunit VIIa 1, isoform CRA_a [Mus musculus]	sp|P56392|CX7A1_MOUSE	Cytochrome c oxidase subunit 7A1, mitochondrial OS=Mus musculus GN=Cox7a1 PE=1 SV=1	--	--	--	--	mmu:12865	Cox7a1, COX7A, COX7AH, COX7AM; cytochrome c oxidase subunit VIIa 1; K02270 cytochrome c oxidase subunit 7a	GO:1902600 hydrogen ion transmembrane transport	GO:0004129 cytochrome-c oxidase activity	GO:0016021 integral component of membrane | GO:0005746 mitochondrial respiratory chain	PF02238.12 COX7a	IPR003177 Cytochrome c oxidase, subunit VIIa
ENSMUSG00000024846	62	13	-2.1987	Down	0.0269684	ENSMUST00000025764;ENSMUST00000237627;ENSMUST00000238111	Cst6	protein_coding	cystatin E/M [Source:MGI Symbol;Acc:MGI:1920970]	ENSMUSP00000025764,ENSMUSP00000158005	gi|21312060|ref|NP_082899.1|	cystatin-M precursor [Mus musculus] >gi|22035195|gb|AAM11475.1| cystatin M/E [Mus musculus] >gi|38512022|gb|AAH61036.1| Cystatin E/M [Mus musculus] >gi|148701166|gb|EDL33113.1| cystatin E/M [Mus musculus]	sp|Q15828|CYTM_HUMAN	Cystatin-M OS=Homo sapiens GN=CST6 PE=1 SV=1	--	--	--	--	mmu:73720	Cst6, 1110017E11Rik, N28197, ichq; cystatin E/M; K13902 cystatin-M	GO:0008344 adult locomotory behavior | GO:0010951 negative regulation of endopeptidase activity | GO:0008544 epidermis development	GO:0002020 protease binding | GO:0044822 poly(A) RNA binding | GO:0004869 cysteine-type endopeptidase inhibitor activity	GO:0005730 nucleolus | GO:0070062 extracellular exosome | GO:0005615 extracellular space | GO:0005737 cytoplasm | GO:0001533 cornified envelope	PF00031.18 Cystatin	IPR000010 Cystatin domain | IPR020381 Proteinase inhibitor I25, cystatin, conserved region | IPR027214 Cystatin
ENSMUSG00000093575	52	9	-2.47002	Down	0.0180233	ENSMUST00000176233;ENSMUST00000146935	Gm20695	protein_coding	predicted gene 20695 [Source:MGI Symbol;Acc:MGI:5313142]	ENSMUSP00000135826	gi|148664796|gb|EDK97212.1|	mCG126176 [Mus musculus]	sp|Q8R3P7|CLUA1_MOUSE	Clusterin-associated protein 1 OS=Mus musculus GN=Cluap1 PE=1 SV=1	--	--	--	--	mmu:76779	Cluap1, 2310030D15Rik, 2610111M03Rik; clusterin associated protein 1; K19684 clusterin-associated protein 1	GO:0060972 left/right pattern formation | GO:0035082 axoneme assembly | GO:0042073 intraciliary transport | GO:0001947 heart looping | GO:0021508 floor plate formation | GO:0007224 smoothened signaling pathway | GO:0001843 neural tube closure	--	GO:0097542 ciliary tip | GO:0005654 nucleoplasm | GO:0097546 ciliary base | GO:0030992 intraciliary transport particle B | GO:0005813 centrosome | GO:0005930 axoneme	PF10234.6 Cluap1	--
ENSMUSG00000067455	1096	131	-3.019	Down	5.46574e-08	ENSMUST00000087714	H4c11	protein_coding	H4 clustered histone 11 [Source:MGI Symbol;Acc:MGI:2448436]	ENSMUSP00000085006	gi|1007715256|ref|XP_015799297.1|	PREDICTED: histone H4-like [Nothobranchius furzeri]	sp|Q28DR4|H4_XENTR	Histone H4 OS=Xenopus tropicalis GN=TGas006m08.1 PE=3 SV=1	COG2036	162	Chromatin structure and dynamics ;	Histones H3 and H4	cmk:103172236	histone H4; K11254 histone H4	GO:0000278 mitotic cell cycle | GO:0031047 gene silencing by RNA | GO:0045815 positive regulation of gene expression, epigenetic | GO:0000183 chromatin silencing at rDNA | GO:0000724 double-strand break repair via homologous recombination | GO:1904837 beta-catenin-TCF complex assembly | GO:0006303 double-strand break repair via nonhomologous end joining | GO:0051290 protein heterotetramerization …	GO:0035575 histone demethylase activity (H4-K20 specific) | GO:0042393 histone binding | GO:0044822 poly(A) RNA binding | GO:0046982 protein heterodimerization activity | GO:0019904 protein domain specific binding | GO:0003677 DNA binding	GO:0005654 nucleoplasm | GO:0016020 membrane | GO:0000784 nuclear chromosome, telomeric region | GO:0000786 nucleosome | GO:0070062 extracellular exosome	PF15511.3 CENP-T_C	IPR001951 Histone H4 | IPR004823 TATA box binding protein associated factor (TAF) | IPR009072 Histone-fold | IPR019809 Histone H4, conserved site
ENSMUSG00000057322	14741	1407	-3.34461	Down	2.43128e-10	ENSMUST00000106602;ENSMUST00000077915;ENSMUST00000106599;ENSMUST00000082092	Rpl38	protein_coding	ribosomal protein L38 [Source:MGI Symbol;Acc:MGI:1914921]	ENSMUSP00000102213,ENSMUSP00000102211,ENSMUSP00000102209,ENSMUSP00000080741	gi|12963655|ref|NP_075861.1|	60S ribosomal protein L38 [Mus musculus] >gi|114205440|ref|NP_001041523.1| 60S ribosomal protein L38 [Mus musculus] >gi|114205444|ref|NP_001041522.1| 60S ribosomal protein L38 [Mus musculus] >gi|22001919|sp|Q9JJI8.3|RL38_MOUSE RecName: Full=60S ribosomal protein L38 >gi|9650960|dbj|BAB03500.1| ribosomal protein L38 [Mus musculus] >gi|21706422|gb|AAH34339.1| Ribosomal protein L38 [Mus musculus] >g…	sp|Q9JJI8|RL38_MOUSE	60S ribosomal protein L38 OS=Mus musculus GN=Rpl38 PE=1 SV=3	--	--	--	--	mmu:67671	Rpl38, 0610025G13Rik, Rbt, Ts, Tss; ribosomal protein L38; K02923 large subunit ribosomal protein L38e	GO:0001503 ossification | GO:0006417 regulation of translation | GO:0042474 middle ear morphogenesis | GO:0034463 90S preribosome assembly | GO:0048318 axial mesoderm development | GO:0001501 skeletal system development | GO:0007605 sensory perception of sound	GO:0003723 RNA binding | GO:0003735 structural constituent of ribosome	GO:0033291 eukaryotic 80S initiation complex | GO:0005925 focal adhesion | GO:0022625 cytosolic large ribosomal subunit	PF01781.15 Ribosomal_L38e	IPR002675 Ribosomal protein L38e
ENSMUSG00000115388	74	13	-2.45348	Down	0.0056012	ENSMUST00000226781	Eppk1	protein_coding	epiplakin 1 [Source:MGI Symbol;Acc:MGI:2386306]	ENSMUSP00000154609	gi|37537522|ref|NP_659097.2|	epiplakin [Mus musculus] >gi|34098594|sp|Q8R0W0.2|EPIPL_MOUSE RecName: Full=Epiplakin >gi|32140777|gb|AAP70316.1| epiplakin [Mus musculus]	sp|Q8R0W0|EPIPL_MOUSE	Epiplakin OS=Mus musculus GN=Eppk1 PE=1 SV=2	--	--	--	--	aam:106492940	PLEC; plectin; K10388 plectin	--	GO:0044822 poly(A) RNA binding	GO:0005856 cytoskeleton | GO:0005737 cytoplasm	PF00681.17 Plectin	IPR001101 Plectin repeat
ENSMUSG00000026032	466	105	-2.10423	Down	0.00121989	ENSMUST00000027193	Ndufb3	protein_coding	NADH:ubiquinone oxidoreductase subunit B3 [Source:MGI Symbol;Acc:MGI:1913745]	ENSMUSP00000027193	gi|13385054|ref|NP_079873.1|	NADH dehydrogenase [ubiquinone] 1 beta subcomplex subunit 3 [Mus musculus] >gi|47117300|sp|Q9CQZ6.1|NDUB3_MOUSE RecName: Full=NADH dehydrogenase [ubiquinone] 1 beta subcomplex subunit 3; AltName: Full=Complex I-B12; Short=CI-B12; AltName: Full=NADH-ubiquinone oxidoreductase B12 subunit >gi|22478081|gb|AAH36989.1| NADH dehydrogenase (ubiquinone) 1 beta subcomplex 3 [Mus musculus] >gi|148667672|gb|…	sp|Q9CQZ6|NDUB3_MOUSE	NADH dehydrogenase [ubiquinone] 1 beta subcomplex subunit 3 OS=Mus musculus GN=Ndufb3 PE=1 SV=1	--	--	--	--	mmu:66495	Ndufb3, 2700033I16Rik, CI-B12; NADH dehydrogenase (ubiquinone) 1 beta subcomplex 3; K03959 NADH dehydrogenase (ubiquinone) 1 beta subcomplex subunit 3	GO:0006810 transport | GO:0022900 electron transport chain	--	GO:0005747 mitochondrial respiratory chain complex I | GO:0016021 integral component of membrane | GO:0070062 extracellular exosome	PF08122.9 NDUF_B12	IPR012576 NADH dehydrogenase [ubiquinone] 1 beta subcomplex subunit 3
ENSMUSG00000097221	361	0	-11.4743	Down	1.78364e-22	ENSMUST00000180521	1810049J17Rik	protein_coding	RIKEN cDNA 1810049J17 gene [Source:MGI Symbol;Acc:MGI:3704453]	ENSMUSP00000137703	gi|74203312|dbj|BAE20829.1|	unnamed protein product [Mus musculus]	--	--	--	--	--	--	--	--	--	--	--	--	--
ENSMUSG00000092162	16	0	-6.98936	Down	0.0266183	ENSMUST00000170257	Vmn2r86	protein_coding	vomeronasal 2, receptor 86 [Source:MGI Symbol;Acc:MGI:3649066]	ENSMUSP00000126596	gi|157074219|ref|NP_001096835.1|	vomeronasal 2, receptor 86 precursor [Mus musculus] >gi|148692751|gb|EDL24698.1| mCG118760 [Mus musculus]	sp|E9Q6I0|V2116_MOUSE	Vomeronasal type-2 receptor 116 OS=Mus musculus GN=Vmn2r116 PE=1 SV=1	--	--	--	--	mmu:22300	Vmn2r123, V2r1; vomeronasal 2, receptor 123; K04613 vomeronasal 2 receptor	--	--	--	PF01094.25 ANF_receptor	IPR000337 GPCR, family 3 | IPR001828 Receptor, ligand binding region | IPR004073 GPCR, family 3, vomeronasal receptor, type 2 | IPR011500 GPCR, family 3, nine cysteines domain | IPR017978 GPCR family 3, C-terminal | IPR028082 Periplasmic binding protein-like I
ENSMUSG00000058546	25805	6066	-2.04439	Down	0.000653678	ENSMUST00000127270;ENSMUST00000144561;ENSMUST00000102483	Rpl23a	protein_coding	ribosomal protein L23A [Source:MGI Symbol;Acc:MGI:3040672]	ENSMUSP00000099541	gi|327315383|ref|NP_001192153.1|	60S ribosomal protein L23a [Oryctolagus cuniculus]	sp|Q24JY1|RL23A_BOVIN	60S ribosomal protein L23a OS=Bos taurus GN=RPL23A PE=2 SV=1	COG0089	172	Translation, ribosomal structure and biogenesis ;	Ribosomal protein L23	ssc:100514795	RPL23A; ribosomal protein L23a; K02893 large subunit ribosomal protein L23Ae	GO:0000184 nuclear-transcribed mRNA catabolic process, nonsense-mediated decay | GO:0006415 translational termination | GO:0006413 translational initiation | GO:0016259 selenocysteine metabolic process | GO:0000027 ribosomal large subunit assembly | GO:0008283 cell proliferation | GO:0006414 translational elongation | GO:0019083 viral transcription | GO:0006614 SRP-dependent cotranslational prote…	GO:0005515 protein binding | GO:0000166 nucleotide binding | GO:0044822 poly(A) RNA binding | GO:0070180 large ribosomal subunit rRNA binding | GO:0003735 structural constituent of ribosome	GO:0031932 TORC2 complex | GO:0022625 cytosolic large ribosomal subunit | GO:0005730 nucleolus | GO:0070062 extracellular exosome	PF03939.10 Ribosomal_L23eN	--
ENSMUSG00000105103	25	2	-3.52059	Down	0.0240475	ENSMUST00000140672	Gm43191	protein_coding	predicted gene 43191 [Source:MGI Symbol;Acc:MGI:5663328]	ENSMUSP00000114952	gi|543263468|ref|XP_005422156.1|	PREDICTED: hippocampus abundant transcript 1 protein [Geospiza fortis]	sp|P70187|MF14A_MOUSE	Hippocampus abundant transcript 1 protein OS=Mus musculus GN=Mfsd14a PE=2 SV=3	COG0697	87.8	Carbohydrate transport and metabolism ; Amino acid transport and metabolism ; General function prediction only ;	Permeases of the drug/metabolite transporter (DMT) superfamily	mmu:229782	Slc35a3, 2310050P13Rik; solute carrier family 35 (UDP-N-acetylglucosamine (UDP-GlcNAc) transporter), member 3; K15272 solute carrier family 35 (UDP-sugar transporter), member A1/2/3	GO:0055085 transmembrane transport	GO:0005215 transporter activity	GO:0016021 integral component of membrane	PF04142.12 Nuc_sug_transp	IPR001958 Tetracycline resistance protein TetA/multidrug resistance protein MdtG | IPR005829 Sugar transporter, conserved site | IPR007271 Nucleotide-sugar transporter | IPR011701 Major facilitator superfamily | IPR020846 Major facilitator superfamily domain
ENSMUSG00000039103	73	16	-2.13686	Down	0.0224437	ENSMUST00000199470;ENSMUST00000046045;ENSMUST00000199423;ENSMUST00000196529;ENSMUST00000198460;ENSMUST00000199983;ENSMUST00000198734;ENSMUST00000200589;ENSMUST00000198750;ENSMUST00000198404;ENSMUST00000196815;ENSMUST00000198648;ENSMUST00000196504;ENSMUST00000199685;ENSMUST00000197282;ENSMUST00000199752	Nexn	protein_coding	nexilin [Source:MGI Symbol;Acc:MGI:1916060]	ENSMUSP00000143133,ENSMUSP00000037120,ENSMUSP00000142936,ENSMUSP00000143436,ENSMUSP00000143573,ENSMUSP00000142559,ENSMUSP00000142574,ENSMUSP00000142573,ENSMUSP00000143294,ENSMUSP00000143180,ENSMUSP00000142569	gi|568923866|ref|XP_006502053.1|	PREDICTED: nexilin isoform X2 [Mus musculus] >gi|568923868|ref|XP_006502054.1| PREDICTED: nexilin isoform X2 [Mus musculus] >gi|568923870|ref|XP_006502055.1| PREDICTED: nexilin isoform X2 [Mus musculus] >gi|568923872|ref|XP_006502056.1| PREDICTED: nexilin isoform X2 [Mus musculus] >gi|755504357|ref|XP_011238516.1| PREDICTED: nexilin isoform X2 [Mus musculus]	sp|Q7TPW1|NEXN_MOUSE	Nexilin OS=Mus musculus GN=Nexn PE=1 SV=3	--	--	--	--	dre:569510	mylka, fj60a06, mlck1a, mylk, smMLCK, wu:fj60a06, zmlck1; myosin, light chain kinase a; K00907 myosin-light-chain kinase [EC:2.7.11.18]	GO:0051493 regulation of cytoskeleton organization | GO:0048739 cardiac muscle fiber development | GO:0030334 regulation of cell migration	GO:0008307 structural constituent of muscle | GO:0051015 actin filament binding	GO:0030018 Z disc | GO:0005856 cytoskeleton | GO:0005925 focal adhesion	PF07679.13 I-set	IPR003599 Immunoglobulin subtype | IPR007110 Immunoglobulin-like domain | IPR013098 Immunoglobulin I-set | IPR013783 Immunoglobulin-like fold
ENSMUSG00000039001	13339	3497	-1.88701	Down	0.00266418	ENSMUST00000059080;ENSMUST00000148629;ENSMUST00000125301;ENSMUST00000145043	Rps21	protein_coding	ribosomal protein S21 [Source:MGI Symbol;Acc:MGI:1913731]	ENSMUSP00000058432	gi|21536222|ref|NP_079863.1|	40S ribosomal protein S21 [Mus musculus] >gi|22001961|sp|Q9CQR2.1|RS21_MOUSE RecName: Full=40S ribosomal protein S21 >gi|20380465|gb|AAH27563.1| Ribosomal protein S21 [Mus musculus] >gi|56541052|gb|AAH86912.1| Ribosomal protein S21 [Mus musculus] >gi|148675374|gb|EDL07321.1| mCG6739, isoform CRA_a [Mus musculus] >gi|148675375|gb|EDL07322.1| mCG6739, isoform CRA_a [Mus musculus] >gi|148675376|gb|E…	sp|Q9CQR2|RS21_MOUSE	40S ribosomal protein S21 OS=Mus musculus GN=Rps21 PE=1 SV=1	--	--	--	--	mmu:66481	Rps21, 1810049N11Rik, 2410030A14Rik; ribosomal protein S21; K02971 small subunit ribosomal protein S21e	GO:0006412 translation | GO:0000461 endonucleolytic cleavage to generate mature 3'-end of SSU-rRNA from (SSU-rRNA, 5.8S rRNA, LSU-rRNA) | GO:0000447 endonucleolytic cleavage in ITS1 to separate SSU-rRNA from 5.8S rRNA and LSU-rRNA from tricistronic rRNA transcript (SSU-rRNA, 5.8S rRNA, LSU-rRNA)	GO:0047485 protein N-terminus binding | GO:0003735 structural constituent of ribosome | GO:0043022 ribosome binding | GO:0044822 poly(A) RNA binding	GO:0022627 cytosolic small ribosomal subunit	PF01249.15 Ribosomal_S21e	IPR001931 Ribosomal protein S21e | IPR018279 Ribosomal protein S21e, conserved site
ENSMUSG00000033938	1037	236	-2.09056	Down	0.000728138	ENSMUST00000036996;ENSMUST00000127162	Ndufb7	protein_coding	NADH:ubiquinone oxidoreductase subunit B7 [Source:MGI Symbol;Acc:MGI:1914166]	ENSMUSP00000037341	gi|13385322|ref|NP_080119.1|	NADH dehydrogenase [ubiquinone] 1 beta subcomplex subunit 7 [Mus musculus] >gi|47117301|sp|Q9CR61.3|NDUB7_MOUSE RecName: Full=NADH dehydrogenase [ubiquinone] 1 beta subcomplex subunit 7; AltName: Full=Complex I-B18; Short=CI-B18; AltName: Full=NADH-ubiquinone oxidoreductase B18 subunit >gi|21961398|gb|AAH34787.1| NADH dehydrogenase (ubiquinone) 1 beta subcomplex, 7 [Mus musculus]	sp|Q9CR61|NDUB7_MOUSE	NADH dehydrogenase [ubiquinone] 1 beta subcomplex subunit 7 OS=Mus musculus GN=Ndufb7 PE=1 SV=3	--	--	--	--	mmu:66916	Ndufb7, 1110002H15Rik; NADH dehydrogenase (ubiquinone) 1 beta subcomplex, 7; K03963 NADH dehydrogenase (ubiquinone) 1 beta subcomplex subunit 7	GO:0006810 transport | GO:0055114 oxidation-reduction process	GO:0008137 NADH dehydrogenase (ubiquinone) activity	GO:0005758 mitochondrial intermembrane space | GO:0005747 mitochondrial respiratory chain complex I	PF05676.10 NDUF_B7	IPR008698 NADH:ubiquinone oxidoreductase, B18 subunit
ENSMUSG00000070717	21	0	-7.37897	Down	0.00497829	ENSMUST00000094662	Gm10300	protein_coding	predicted gene 10300 [Source:MGI Symbol;Acc:MGI:3641670]	--	--	--	--	--	--	--	--	--	--	--	--	--	--	--	--
ENSMUSG00000031722	792	163	-2.23535	Down	0.000234264	ENSMUST00000074898;ENSMUST00000212918;ENSMUST00000212018	Hp	protein_coding	haptoglobin [Source:MGI Symbol;Acc:MGI:96211]	ENSMUSP00000074436	gi|8850219|ref|NP_059066.1|	haptoglobin precursor [Mus musculus] >gi|41019125|sp|Q61646.1|HPT_MOUSE RecName: Full=Haptoglobin; AltName: Full=Zonulin; Contains: RecName: Full=Haptoglobin alpha chain; Contains: RecName: Full=Haptoglobin beta chain; Flags: Precursor >gi|193754|gb|AAA37779.1| haptoglobin [Mus musculus] >gi|148679476|gb|EDL11423.1| haptoglobin, isoform CRA_a [Mus musculus] >gi|187954105|gb|AAI38873.1| Haptoglobi…	sp|Q61646|HPT_MOUSE	Haptoglobin OS=Mus musculus GN=Hp PE=1 SV=1	--	--	--	--	mmu:15439	Hp, HP-1, preHP2; haptoglobin; K16142 haptoglobin	GO:0007015 actin filament organization | GO:0010288 response to lead ion | GO:0010165 response to X-ray | GO:0071281 cellular response to iron ion | GO:0042542 response to hydrogen peroxide | GO:0051602 response to electrical stimulus | GO:0030316 osteoclast differentiation | GO:0070447 positive regulation of oligodendrocyte progenitor proliferation | GO:0045780 positive regulation of bone resorp…	GO:0042803 protein homodimerization activity | GO:0030492 hemoglobin binding | GO:0016209 antioxidant activity | GO:1990459 transferrin receptor binding | GO:0004252 serine-type endopeptidase activity | GO:0008198 ferrous iron binding | GO:0008199 ferric iron binding | GO:0015091 ferric iron transmembrane transporter activity	GO:0030139 endocytic vesicle | GO:0030120 vesicle coat | GO:0031232 extrinsic component of external side of plasma membrane | GO:0016324 apical plasma membrane | GO:0031838 haptoglobin-hemoglobin complex | GO:0009925 basal plasma membrane | GO:0005783 endoplasmic reticulum | GO:0055037 recycling endosome | GO:0072562 blood microparticle | GO:0005604 basement membrane | GO:0070062 extracellular ex…	PF00089.23 Trypsin	IPR000436 Sushi/SCR/CCP domain | IPR001254 Serine proteases, trypsin domain | IPR001314 Peptidase S1A, chymotrypsin family | IPR008292 Haptoglobin | IPR009003 Peptidase S1, PA clan
ENSMUSG00000025290	20690	6121	-1.71266	Down	0.00923342	ENSMUST00000223931;ENSMUST00000112384;ENSMUST00000169826;ENSMUST00000225994;ENSMUST00000225023;ENSMUST00000223939;ENSMUST00000223999;ENSMUST00000225117;ENSMUST00000224568;ENSMUST00000224549;ENSMUST00000224569;ENSMUST00000224699	Rps24	protein_coding	ribosomal protein S24 [Source:MGI Symbol;Acc:MGI:98147]	ENSMUSP00000125977,ENSMUSP00000152944,ENSMUSP00000153659,ENSMUSP00000153637,ENSMUSP00000108003	gi|817324738|ref|XP_012333070.1|	PREDICTED: LOW QUALITY PROTEIN: 40S ribosomal protein S24-like [Aotus nancymaae]	sp|P62847|RS24_HUMAN	40S ribosomal protein S24 OS=Homo sapiens GN=RPS24 PE=1 SV=1	COG2004	163	Translation, ribosomal structure and biogenesis ;	Ribosomal protein S24E	hgl:101706007	Rps24; ribosomal protein S24; K02974 small subunit ribosomal protein S24e	GO:0000184 nuclear-transcribed mRNA catabolic process, nonsense-mediated decay | GO:0097421 liver regeneration | GO:0006415 translational termination | GO:0006413 translational initiation | GO:0034101 erythrocyte homeostasis | GO:0016259 selenocysteine metabolic process | GO:0006414 translational elongation | GO:0000462 maturation of SSU-rRNA from tricistronic rRNA transcript (SSU-rRNA, 5.8S rRNA…	GO:0000166 nucleotide binding | GO:0044822 poly(A) RNA binding | GO:0003743 translation initiation factor activity | GO:0003735 structural constituent of ribosome | GO:0031369 translation initiation factor binding | GO:0032403 protein complex binding	GO:0005654 nucleoplasm | GO:0016020 membrane | GO:0022627 cytosolic small ribosomal subunit	PF01282.16 Ribosomal_S24e	IPR001976 Ribosomal protein S24e | IPR012677 Nucleotide-binding alpha-beta plait domain | IPR012678 Ribosomal protein L23/L15e core domain | IPR018098 Ribosomal S24e conserved site
ENSMUSG00000031375	48	175	1.90787	Up	0.012361	ENSMUST00000133394;ENSMUST00000033741;ENSMUST00000141945;ENSMUST00000130873;ENSMUST00000169489;ENSMUST00000140803;ENSMUST00000155231;ENSMUST00000183174	Bgn	protein_coding	biglycan [Source:MGI Symbol;Acc:MGI:88158]	ENSMUSP00000033741,ENSMUSP00000126768	gi|20137008|ref|NP_031568.2|	biglycan preproprotein [Mus musculus] >gi|129948|sp|P28653.1|PGS1_MOUSE RecName: Full=Biglycan; AltName: Full=Bone/cartilage proteoglycan I; AltName: Full=PG-S1; Flags: Precursor >gi|53667|emb|CAA37875.1| biglycan (PGI) [Mus musculus] >gi|13529440|gb|AAH05452.1| Biglycan [Mus musculus] >gi|18044515|gb|AAH19502.1| Biglycan [Mus musculus] >gi|148697950|gb|EDL29897.1| biglycan [Mus musculus]	sp|P28653|PGS1_MOUSE	Biglycan OS=Mus musculus GN=Bgn PE=1 SV=1	COG4886	63.9	Function unknown ;	Leucine-rich repeat (LRR) protein	mmu:12111	Bgn, BG, DSPG1, PG-S1, PGI, SLRR1A; biglycan; K08118 biglycan	GO:0006469 negative regulation of protein kinase activity | GO:0019221 cytokine-mediated signaling pathway | GO:0046426 negative regulation of JAK-STAT cascade | GO:0019800 peptide cross-linking via chondroitin 4-sulfate glycosaminoglycan	GO:0050840 extracellular matrix binding | GO:0004860 protein kinase inhibitor activity | GO:0005539 glycosaminoglycan binding	GO:0030133 transport vesicle | GO:0009986 cell surface | GO:0042383 sarcolemma | GO:0005578 proteinaceous extracellular matrix | GO:0070062 extracellular exosome	PF01462.15 LRRNT	IPR000372 Leucine-rich repeat N-terminal domain | IPR001611 Leucine-rich repeat | IPR003591 Leucine-rich repeat, typical subtype | IPR016352 Small leucine-rich proteoglycan, class I, decorin/asporin/byglycan | IPR028547 Biglycan | IPR032675 Leucine-rich repeat domain, L domain-like
ENSMUSG00000026009	32	118	1.92285	Up	0.0194461	ENSMUST00000027162;ENSMUST00000102827	Icos	protein_coding	inducible T cell co-stimulator [Source:MGI Symbol;Acc:MGI:1858745]	ENSMUSP00000027162,ENSMUSP00000099891	gi|122891360|emb|CAM13242.1|	inducible T-cell co-stimulator [Mus musculus]	sp|Q9WVS0|ICOS_MOUSE	Inducible T-cell costimulator OS=Mus musculus GN=Icos PE=1 SV=2	--	--	--	--	mmu:54167	Icos, AILIM, CCLP, CRP-1, H4, Ly115; inducible T cell co-stimulator; K06713 inducible T-cell co-stimulator	GO:0031295 T cell costimulation | GO:0002517 T cell tolerance induction	GO:0005515 protein binding	GO:0009897 external side of plasma membrane | GO:0005887 integral component of plasma membrane	PF15910.2 V-set_2	IPR013106 Immunoglobulin V-set domain
ENSMUSG00000050541	7	51	2.88704	Up	0.004769	ENSMUST00000124306;ENSMUST00000167574;ENSMUST00000067258;ENSMUST00000139906	Adra1b	protein_coding	adrenergic receptor, alpha 1b [Source:MGI Symbol;Acc:MGI:104774]	ENSMUSP00000070200,ENSMUSP00000123435,ENSMUSP00000129200	gi|66792804|ref|NP_031442.2|	alpha-1B adrenergic receptor [Mus musculus] >gi|548923934|ref|NP_001271309.1| alpha-1B adrenergic receptor [Mus musculus] >gi|548923936|ref|NP_001271310.1| alpha-1B adrenergic receptor [Mus musculus] >gi|148701903|gb|EDL33850.1| adrenergic receptor, alpha 1b, isoform CRA_a [Mus musculus] >gi|148701904|gb|EDL33851.1| adrenergic receptor, alpha 1b, isoform CRA_a [Mus musculus] >gi|187951137|gb|AAI3…	sp|P15823|ADA1B_RAT	Alpha-1B adrenergic receptor OS=Rattus norvegicus GN=Adra1b PE=2 SV=2	--	--	--	--	mmu:11548	Adra1b, [a]1b; adrenergic receptor, alpha 1b; K04136 adrenergic receptor alpha-1B	GO:0071880 adenylate cyclase-activating adrenergic receptor signaling pathway | GO:0001996 positive regulation of heart rate by epinephrine-norepinephrine | GO:0048148 behavioral response to cocaine | GO:0035265 organ growth | GO:0007204 positive regulation of cytosolic calcium ion concentration | GO:0001994 norepinephrine-epinephrine vasoconstriction involved in regulation of systemic arterial b…	GO:0004937 alpha1-adrenergic receptor activity | GO:0046982 protein heterodimerization activity	GO:0005887 integral component of plasma membrane | GO:0005829 cytosol | GO:0030315 T-tubule | GO:0031965 nuclear membrane | GO:0014704 intercalated disc	PF00001.18 7tm_1	IPR000276 G protein-coupled receptor, rhodopsin-like | IPR001115 Alpha 1B adrenoceptor | IPR002233 Adrenoceptor family | IPR017452 GPCR, rhodopsin-like, 7TM
ENSMUSG00000027907	371	40	-3.16499	Down	1.51298e-07	ENSMUST00000029515	S100a11	protein_coding	S100 calcium binding protein A11 [Source:MGI Symbol;Acc:MGI:1338798]	ENSMUSP00000029515	gi|21886811|ref|NP_058020.1|	protein S100-A11 [Mus musculus] >gi|1710819|sp|P50543.1|S10AB_MOUSE RecName: Full=Protein S100-A11; AltName: Full=Calgizzarin; AltName: Full=Endothelial monocyte-activating polypeptide; Short=EMAP; AltName: Full=Protein S100-C; AltName: Full=S100 calcium-binding protein A11 >gi|1150724|gb|AAA85181.1| endothelial monocyte-activating polypeptide [Mus musculus] >gi|18314646|gb|AAH21916.1| S100 calci…	sp|P50543|S10AB_MOUSE	Protein S100-A11 OS=Mus musculus GN=S100a11 PE=1 SV=1	--	--	--	--	tng:GSTEN00032575G001	unnamed protein product; K17274 calpactin-1 light chain	GO:0007283 spermatogenesis | GO:0042127 regulation of cell proliferation	GO:0044548 S100 protein binding | GO:0005509 calcium ion binding | GO:0048306 calcium-dependent protein binding | GO:0042803 protein homodimerization activity	GO:0005737 cytoplasm | GO:0005615 extracellular space | GO:0001726 ruffle | GO:0005634 nucleus | GO:0070062 extracellular exosome	PF01023.16 S_100	IPR001751 S100/Calbindin-D9k, conserved site | IPR002048 EF-hand domain | IPR011992 EF-hand domain pair | IPR013787 S100/CaBP-9k-type, calcium binding, subdomain | IPR018247 EF-Hand 1, calcium-binding site | IPR028482 Protein S100-A11
ENSMUSG00000064357	3122	510	-2.5692	Down	3.74384e-06	ENSMUST00000082408	mt-Atp6	protein_coding	mitochondrially encoded ATP synthase 6 [Source:MGI Symbol;Acc:MGI:99927]	ENSMUSP00000080996	gi|34538603|ref|NP_904333.1|	ATP synthase F0 subunit 6 (mitochondrion) [Mus musculus] >gi|62198719|ref|YP_220555.1| ATP synthase F0 subunit 6 (mitochondrion) [Mus musculus domesticus] >gi|114447|sp|P00848.1|ATP6_MOUSE RecName: Full=ATP synthase subunit a; AltName: Full=F-ATPase protein 6 >gi|342523|gb|AAB48649.1| ATPase 6 (mitochondrion) [Mus musculus] >gi|3719449|gb|AAC63375.1| ATPase subunit 6 [Mus musculus] >gi|7770104|db…	sp|P00848|ATP6_MOUSE	ATP synthase subunit a OS=Mus musculus GN=Mtatp6 PE=1 SV=1	COG0356	109	Energy production and conversion ;	F0F1-type ATP synthase, subunit a	mmu:17705	ATP6; ATP synthase F0 subunit 6; K02126 F-type H+-transporting ATPase subunit a	GO:0015986 ATP synthesis coupled proton transport	GO:0015078 hydrogen ion transmembrane transporter activity | GO:0016787 hydrolase activity	GO:0016021 integral component of membrane | GO:0005743 mitochondrial inner membrane	PF00119.17 ATP-synt_A	--
ENSMUSG00000109516	0	20	7.35316	Up	0.00670455	ENSMUST00000207192;ENSMUST00000177741	Gm6882	protein_coding	predicted gene 6882 [Source:MGI Symbol;Acc:MGI:3645601]	ENSMUSP00000146341,ENSMUSP00000136005	gi|85702264|ref|NP_001030076.1|	serine/threonine kinase-like [Mus musculus] >gi|318103645|ref|NP_001188293.1| serine/threonine kinase-like [Mus musculus]	sp|O08679|MARK2_RAT	Serine/threonine-protein kinase MARK2 OS=Rattus norvegicus GN=Mark2 PE=1 SV=1	--	--	--	--	cge:100768554	sperm motility kinase 2B-like; K08798 MAP/microtubule affinity-regulating kinase [EC:2.7.11.1]	--	--	--	PF00069.22 Pkinase	IPR000719 Protein kinase domain | IPR008271 Serine/threonine-protein kinase, active site | IPR011009 Protein kinase-like domain | IPR017441 Protein kinase, ATP binding site
ENSMUSG00000025880	1332	3649	1.49823	Up	0.0421536	ENSMUST00000026999;ENSMUST00000168918;ENSMUST00000174843;ENSMUST00000174411;ENSMUST00000172718	Smad7	protein_coding	SMAD family member 7 [Source:MGI Symbol;Acc:MGI:1100518]	ENSMUSP00000129322,ENSMUSP00000026999,ENSMUSP00000133544,ENSMUSP00000133696	gi|111154105|ref|NP_001036125.1|	mothers against decapentaplegic homolog 7 [Mus musculus] >gi|13959541|sp|O35253.1|SMAD7_MOUSE RecName: Full=Mothers against decapentaplegic homolog 7; Short=MAD homolog 7; Short=Mothers against DPP homolog 7; AltName: Full=Mothers against decapentaplegic homolog 8; Short=MAD homolog 8; Short=Mothers against DPP homolog 8; AltName: Full=SMAD family member 7; Short=SMAD 7; Short=Smad7 >gi|2460040|g…	sp|O35253|SMAD7_MOUSE	Mothers against decapentaplegic homolog 7 OS=Mus musculus GN=Smad7 PE=1 SV=1	--	--	--	--	mmu:17131	Smad7, Madh7; SMAD family member 7; K19631 mothers against decapentaplegic homolog 7	GO:0032925 regulation of activin receptor signaling pathway | GO:0030512 negative regulation of transforming growth factor beta receptor signaling pathway | GO:0022409 positive regulation of cell-cell adhesion | GO:0055117 regulation of cardiac muscle contraction | GO:0031398 positive regulation of protein ubiquitination | GO:0043433 negative regulation of sequence-specific DNA binding transcript…	GO:0034713 type I transforming growth factor beta receptor binding | GO:0070411 I-SMAD binding | GO:0030617 transforming growth factor beta receptor, inhibitory cytoplasmic mediator activity | GO:0031625 ubiquitin protein ligase binding | GO:0046872 metal ion binding | GO:0008013 beta-catenin binding | GO:0044212 transcription regulatory region DNA binding | GO:0003700 transcription factor activi…	GO:0005654 nucleoplasm | GO:0016342 catenin complex | GO:0005737 cytoplasm | GO:0005913 cell-cell adherens junction | GO:0005667 transcription factor complex | GO:0005813 centrosome | GO:0005730 nucleolus	PF03165.13 MH1	IPR001132 SMAD domain, Dwarfin-type | IPR003619 MAD homology 1, Dwarfin-type | IPR008984 SMAD/FHA domain | IPR013019 MAD homology, MH1 | IPR013790 Dwarfin | IPR017855 SMAD domain-like
ENSMUSG00000025991	0	27	7.78383	Up	0.000653128	ENSMUST00000027144	Cps1	protein_coding	carbamoyl-phosphate synthetase 1 [Source:MGI Symbol;Acc:MGI:891996]	ENSMUSP00000027144	gi|124248512|ref|NP_001074278.1|	carbamoyl-phosphate synthase [ammonia], mitochondrial precursor [Mus musculus] >gi|73918911|sp|Q8C196.2|CPSM_MOUSE RecName: Full=Carbamoyl-phosphate synthase [ammonia], mitochondrial; AltName: Full=Carbamoyl-phosphate synthetase I; Short=CPSase I; Flags: Precursor >gi|117558725|gb|AAI26970.1| Carbamoyl-phosphate synthetase 1 [Mus musculus]	sp|Q8C196|CPSM_MOUSE	Carbamoyl-phosphate synthase [ammonia], mitochondrial OS=Mus musculus GN=Cps1 PE=1 SV=2	COG0458	1186	Amino acid transport and metabolism ; Nucleotide transport and metabolism ;	Carbamoylphosphate synthase large subunit (split gene in MJ)	mmu:227231	Cps1, 4732433M03Rik, CPS, D1Ucla3; carbamoyl-phosphate synthetase 1; K01948 carbamoyl-phosphate synthase (ammonia) [EC:6.3.4.16]	GO:0009636 response to toxic substance | GO:0007494 midgut development | GO:0032094 response to food | GO:0044344 cellular response to fibroblast growth factor stimulus | GO:0060416 response to growth hormone | GO:0050667 homocysteine metabolic process | GO:0006541 glutamine metabolic process | GO:0071377 cellular response to glucagon stimulus | GO:0006508 proteolysis | GO:0000050 urea cycle | GO…	GO:0004088 carbamoyl-phosphate synthase (glutamine-hydrolyzing) activity | GO:0004087 carbamoyl-phosphate synthase (ammonia) activity | GO:0005543 phospholipid binding | GO:0072341 modified amino acid binding | GO:0004151 dihydroorotase activity | GO:0004175 endopeptidase activity | GO:0032403 protein complex binding | GO:0016595 glutamate binding | GO:0005524 ATP binding | GO:0005509 calcium ion…	GO:0043234 protein complex | GO:0042645 mitochondrial nucleoid | GO:0005743 mitochondrial inner membrane | GO:0005730 nucleolus	PF00988.19 CPSase_sm_chain	IPR002474 Carbamoyl-phosphate synthase, small subunit N-terminal domain | IPR005479 Carbamoyl-phosphate synthetase large subunit-like, ATP-binding domain | IPR005480 Carbamoyl-phosphate synthetase, large subunit oligomerisation domain | IPR005483 Carbamoyl-phosphate synthase large subunit, CPSase domain | IPR006274 Carbamoyl-phosphate synthase, small subunit | IPR006275 Carbamoyl-phosphate syntha…
ENSMUSG00000028780	6694	18183	1.48605	Up	0.0432905	ENSMUST00000030568;ENSMUST00000170181;ENSMUST00000170348;ENSMUST00000169603;ENSMUST00000115271	Sema3c	protein_coding	sema domain, immunoglobulin domain (Ig), short basic domain, secreted, (semaphorin) 3C [Source:MGI Symbol;Acc:MGI:107557]	ENSMUSP00000030568,ENSMUSP00000126614,ENSMUSP00000132330	gi|46048361|ref|NP_038685.3|	semaphorin-3C precursor [Mus musculus] >gi|341942017|sp|Q62181.2|SEM3C_MOUSE RecName: Full=Semaphorin-3C; AltName: Full=Semaphorin-E; Short=Sema E; Flags: Precursor >gi|44890687|gb|AAH66852.1| Sema domain, immunoglobulin domain (Ig), short basic domain, secreted, (semaphorin) 3C [Mus musculus] >gi|148671287|gb|EDL03234.1| sema domain, immunoglobulin domain (Ig), short basic domain, secreted, (sem…	sp|Q62181|SEM3C_MOUSE	Semaphorin-3C OS=Mus musculus GN=Sema3c PE=1 SV=2	--	--	--	--	mmu:20348	Sema3c, 1110036B02Rik, SemE, Semae; sema domain, immunoglobulin domain (Ig), short basic domain, secreted, (semaphorin) 3C; K06840 semaphorin 3	GO:0071526 semaphorin-plexin signaling pathway | GO:0060174 limb bud formation | GO:0003215 cardiac right ventricle morphogenesis | GO:0003151 outflow tract morphogenesis | GO:0001756 somitogenesis | GO:0009791 post-embryonic development | GO:0001755 neural crest cell migration | GO:0003350 pulmonary myocardium development | GO:0060666 dichotomous subdivision of terminal units involved in salivar…	GO:0030215 semaphorin receptor binding | GO:0038191 neuropilin binding | GO:0045499 chemorepellent activity	GO:0005615 extracellular space | GO:0070062 extracellular exosome	PF01403.16 Sema	IPR001627 Sema domain | IPR003598 Immunoglobulin subtype 2 | IPR003599 Immunoglobulin subtype | IPR007110 Immunoglobulin-like domain | IPR013098 Immunoglobulin I-set | IPR013783 Immunoglobulin-like fold | IPR015943 WD40/YVTN repeat-like-containing domain | IPR016201 Plexin-like fold | IPR027231 Semaphorin
ENSMUSG00000059970	147	38	-1.90391	Down	0.0191384	ENSMUST00000080449;ENSMUST00000219555	Hspa2	protein_coding	heat shock protein 2 [Source:MGI Symbol;Acc:MGI:96243]	ENSMUSP00000079306,ENSMUSP00000151408	gi|31560686|ref|NP_032327.2|	heat shock-related 70 kDa protein 2 [Mus musculus] >gi|50345978|ref|NP_001002012.1| heat shock-related 70 kDa protein 2 [Mus musculus] >gi|148887381|sp|P14659.2|HSP72_RAT RecName: Full=Heat shock-related 70 kDa protein 2; Short=Heat shock protein 70.2; AltName: Full=Testis-specific heat shock protein-related; Short=HST >gi|341940808|sp|P17156.2|HSP72_MOUSE RecName: Full=Heat shock-related 70 kDa …	sp|P17156|HSP72_MOUSE	Heat shock-related 70 kDa protein 2 OS=Mus musculus GN=Hspa2 PE=1 SV=2	COG0443	971	Posttranslational modification, protein turnover, chaperones ;	Molecular chaperone	mmu:15512	Hspa2, 70kDa, HSP70.2, HSP70A2, Hsp70-2; heat shock protein 2; K03283 heat shock 70kDa protein 1/8	GO:0007275 multicellular organism development | GO:1901896 positive regulation of calcium-transporting ATPase activity | GO:0070194 synaptonemal complex disassembly | GO:0007141 male meiosis I | GO:0090084 negative regulation of inclusion body assembly | GO:0007286 spermatid development | GO:0009409 response to cold | GO:0009408 response to heat | GO:0042026 protein refolding | GO:0031662 positiv…	GO:0051861 glycolipid binding | GO:0051082 unfolded protein binding | GO:0019899 enzyme binding | GO:0005524 ATP binding	GO:0072562 blood microparticle | GO:0036128 CatSper complex | GO:0043209 myelin sheath | GO:0005829 cytosol | GO:0009986 cell surface | GO:0000795 synaptonemal complex | GO:0001673 male germ cell nucleus | GO:0070062 extracellular exosome | GO:0072687 meiotic spindle | GO:0005739 mitochondrion	PF00012.17 HSP70	IPR013126 Heat shock protein 70 family | IPR018181 Heat shock protein 70, conserved site | IPR029047 Heat shock protein 70kD, peptide-binding domain | IPR029048 Heat shock protein 70kD, C-terminal domain
ENSMUSG00000021214	20	77	1.98245	Up	0.0420825	ENSMUST00000110704;ENSMUST00000021635	Akr1c18	protein_coding	aldo-keto reductase family 1, member C18 [Source:MGI Symbol;Acc:MGI:2145420]	ENSMUSP00000106332,ENSMUSP00000021635	gi|19527284|ref|NP_598827.1|	aldo-keto reductase family 1 member C18 [Mus musculus] >gi|67460561|sp|Q8K023.2|AKC1H_MOUSE RecName: Full=Aldo-keto reductase family 1 member C18; AltName: Full=20-alpha-hydroxysteroid dehydrogenase; Short=20-alpha-HSD >gi|13591597|dbj|BAB40958.1| 20alpha-hydroxysteroid dehydrogenase [Mus musculus] >gi|148700291|gb|EDL32238.1| aldo-keto reductase family 1, member C18, isoform CRA_a [Mus musculus]	sp|Q8K023|AKC1H_MOUSE	Aldo-keto reductase family 1 member C18 OS=Mus musculus GN=Akr1c18 PE=1 SV=2	COG0656	212	General function prediction only ;	Aldo/keto reductases, related to diketogulonate reductase	mmu:105349	Akr1c18, AW146047; aldo-keto reductase family 1, member C18; K05295 20alpha-hydroxysteroid dehydrogenase [EC:1.1.1.149]	GO:0034614 cellular response to reactive oxygen species | GO:0008284 positive regulation of cell proliferation | GO:0007584 response to nutrient | GO:2000379 positive regulation of reactive oxygen species metabolic process | GO:1904322 cellular response to forskolin | GO:1900053 negative regulation of retinoic acid biosynthetic process | GO:0044597 daunorubicin metabolic process | GO:0071560 cell…	GO:0034901 endosulfan hydroxyether dehydrogenase activity | GO:0047787 delta4-3-oxosteroid 5beta-reductase activity | GO:0034871 1-hydroxy-4,4-dimethylpentan-3-one dehydrogenase activity | GO:0034868 2,4,4-trimethyl-3-hydroxypentanoyl-CoA dehydrogenase activity | GO:0042469 versicolorin reductase activity | GO:0018449 1-phenylethanol dehydrogenase activity | GO:0045703 ketoreductase activity | GO…	GO:0005829 cytosol | GO:0070062 extracellular exosome | GO:0005634 nucleus	PF00248.18 Aldo_ket_red	IPR001395 Aldo/keto reductase/potassium channel subunit beta | IPR018170 Aldo/keto reductase, conserved site | IPR020471 Aldo/keto reductase | IPR023210 NADP-dependent oxidoreductase domain
ENSMUSG00000037660	0	23	7.55364	Up	0.00253835	ENSMUST00000220073;ENSMUST00000037313	Gdf7	protein_coding	growth differentiation factor 7 [Source:MGI Symbol;Acc:MGI:95690]	ENSMUSP00000151234,ENSMUSP00000038301	gi|919184464|ref|NP_001299805.1|	growth/differentiation factor 7 isoform 1 precursor [Mus musculus] >gi|50403743|sp|P43029.2|GDF7_MOUSE RecName: Full=Growth/differentiation factor 7; Short=GDF-7; Flags: Precursor	sp|P43029|GDF7_MOUSE	Growth/differentiation factor 7 OS=Mus musculus GN=Gdf7 PE=2 SV=2	--	--	--	--	mmu:238057	Gdf7, BMP12; growth differentiation factor 7; K20013 growth differentiation factor 7	GO:0007411 axon guidance | GO:0045893 positive regulation of transcription, DNA-templated | GO:0048853 forebrain morphogenesis | GO:2001051 positive regulation of tendon cell differentiation | GO:0030901 midbrain development | GO:0010862 positive regulation of pathway-restricted SMAD protein phosphorylation | GO:0042981 regulation of apoptotic process | GO:0040007 growth | GO:0022612 gland morpho…	GO:0008083 growth factor activity | GO:0005125 cytokine activity | GO:0005160 transforming growth factor beta receptor binding | GO:0042803 protein homodimerization activity	GO:0005615 extracellular space	PF00688.15 TGFb_propeptide	IPR001111 Transforming growth factor-beta, N-terminal | IPR001839 Transforming growth factor-beta, C-terminal | IPR002405 Inhibin, alpha subunit | IPR015615 Transforming growth factor-beta-related | IPR017948 Transforming growth factor beta, conserved site | IPR029034 Cystine-knot cytokine
ENSMUSG00000020713	0	1580	13.6482	Up	1.34779e-37	ENSMUST00000103071	Gh	protein_coding	growth hormone [Source:MGI Symbol;Acc:MGI:95707]	ENSMUSP00000099360	gi|6679997|ref|NP_032143.1|	somatotropin precursor [Mus musculus] >gi|134708|sp|P06880.1|SOMA_MOUSE RecName: Full=Somatotropin; AltName: Full=Growth hormone; Flags: Precursor >gi|897780|emb|CAA86658.1| growth hormone [Mus musculus] >gi|38173967|gb|AAH61157.1| Growth hormone [Mus musculus] >gi|148702343|gb|EDL34290.1| growth hormone [Mus musculus] >gi|936911420|tpe|CDW51414.1| TPA: growth hormone b1 [Mus musculus]	sp|P06880|SOMA_MOUSE	Somatotropin OS=Mus musculus GN=Gh1 PE=2 SV=1	--	--	--	--	mmu:14599	Gh, Gh1, Ghb1; growth hormone; K05438 growth hormone	GO:0043568 positive regulation of insulin-like growth factor receptor signaling pathway | GO:0032094 response to food | GO:0071469 cellular response to alkaline pH | GO:0007405 neuroblast proliferation | GO:0014068 positive regulation of phosphatidylinositol 3-kinase signaling | GO:0050769 positive regulation of neurogenesis | GO:0034097 response to cytokine | GO:0015758 glucose transport | GO:00…	GO:0046872 metal ion binding | GO:0008083 growth factor activity | GO:0005148 prolactin receptor binding | GO:0005131 growth hormone receptor binding | GO:0005179 hormone activity	GO:0005802 trans-Golgi network | GO:0005829 cytosol | GO:0005615 extracellular space | GO:0005886 plasma membrane | GO:0005739 mitochondrion | GO:0030141 secretory granule | GO:0005634 nucleus	PF00103.17 Hormone_1	--
ENSMUSG00000039148	269	63	-2.04763	Down	0.00340029	ENSMUST00000044207;ENSMUST00000235855;ENSMUST00000236511;ENSMUST00000237915;ENSMUST00000235654;ENSMUST00000235908	Sart1	protein_coding	squamous cell carcinoma antigen recognized by T cells 1 [Source:MGI Symbol;Acc:MGI:1309453]	ENSMUSP00000047397,ENSMUSP00000157615	gi|124244096|ref|NP_058578.3|	U4/U6.U5 tri-snRNP-associated protein 1 [Mus musculus] >gi|81870173|sp|Q9Z315.1|SNUT1_MOUSE RecName: Full=U4/U6.U5 tri-snRNP-associated protein 1; AltName: Full=Hypoxia-associated factor; AltName: Full=Squamous cell carcinoma antigen recognized by T-cells 1; Short=SART-1; Short=mSART-1 >gi|4126469|dbj|BAA36583.1| mSART-1(806) [Mus musculus] >gi|148701170|gb|EDL33117.1| squamous cell carcinoma ant…	sp|Q9Z315|SNUT1_MOUSE	U4/U6.U5 tri-snRNP-associated protein 1 OS=Mus musculus GN=Sart1 PE=1 SV=1	--	--	--	--	mmu:20227	Sart1, U5-110K; squamous cell carcinoma antigen recognized by T cells 1; K11984 U4/U6.U5 tri-snRNP-associated protein 1	GO:0000481 maturation of 5S rRNA | GO:0045292 mRNA cis splicing, via spliceosome | GO:0045585 positive regulation of cytotoxic T cell differentiation | GO:0000387 spliceosomal snRNP assembly	GO:0044822 poly(A) RNA binding	GO:0015030 Cajal body | GO:0046540 U4/U6 x U5 tri-snRNP complex | GO:0005794 Golgi apparatus | GO:0071013 catalytic step 2 spliceosome	PF03343.10 SART-1	IPR005011 SNU66/SART1 family
ENSMUSG00000113262	18	0	-7.15802	Down	0.0130322	ENSMUST00000144647;ENSMUST00000131968	Gm48551	protein_coding	predicted gene, 48551 [Source:MGI Symbol;Acc:MGI:6098103]	ENSMUSP00000116074,ENSMUSP00000115416	gi|148699466|gb|EDL31413.1|	deoxyhypusine hydroxylase/monooxygenase, isoform CRA_b [Mus musculus]	sp|Q99LN9|DOHH_MOUSE	Deoxyhypusine hydroxylase OS=Mus musculus GN=Dohh PE=1 SV=2	COG1413	125	Energy production and conversion ;	FOG: HEAT repeat	mmu:102115	Dohh, 1110033C18Rik, AI585913, AL022869, Hlrc1; deoxyhypusine hydroxylase/monooxygenase; K06072 deoxyhypusine monooxygenase [EC:1.14.99.29]	GO:0008612 peptidyl-lysine modification to peptidyl-hypusine | GO:0055114 oxidation-reduction process	GO:0046872 metal ion binding | GO:0019135 deoxyhypusine monooxygenase activity	GO:0016020 membrane	PF13646.3 HEAT_2	IPR004155 PBS lyase HEAT-like repeat | IPR011989 Armadillo-like helical | IPR016024 Armadillo-type fold
ENSMUSG00000038587	111	28	-1.93797	Down	0.0288242	ENSMUST00000045730;ENSMUST00000239373;ENSMUST00000239220;ENSMUST00000216139;ENSMUST00000215696	Akap12	protein_coding	A kinase (PRKA) anchor protein (gravin) 12 [Source:MGI Symbol;Acc:MGI:1932576]	ENSMUSP00000035829,ENSMUSP00000159267,ENSMUSP00000159223,ENSMUSP00000159240,ENSMUSP00000150261	gi|13626040|ref|NP_112462.1|	A-kinase anchor protein 12 [Mus musculus] >gi|81869784|sp|Q9WTQ5.1|AKA12_MOUSE RecName: Full=A-kinase anchor protein 12; Short=AKAP-12; AltName: Full=Germ cell lineage protein gercelin; AltName: Full=Src-suppressed C kinase substrate; Short=SSeCKS >gi|13236404|gb|AAK16150.1|AF326228_1 PKC binding protein SSeCKS [Mus musculus] >gi|4589832|dbj|BAA76894.1| SSeCKS [Mus musculus] >gi|148671646|gb|EDL0…	sp|Q9WTQ5|AKA12_MOUSE	A-kinase anchor protein 12 OS=Mus musculus GN=Akap12 PE=1 SV=1	--	--	--	--	mmu:83397	Akap12, AI317366, SSeCKS, Srcs5, Tsga12; A kinase (PRKA) anchor protein (gravin) 12; K16528 A-kinase anchor protein 12	GO:0090036 regulation of protein kinase C signaling | GO:0006605 protein targeting | GO:0030819 positive regulation of cAMP biosynthetic process | GO:0010739 positive regulation of protein kinase A signaling	GO:0051018 protein kinase A binding | GO:0030159 receptor signaling complex scaffold activity | GO:0008179 adenylate cyclase binding	GO:0005925 focal adhesion | GO:0005737 cytoplasm | GO:0005856 cytoskeleton | GO:0005886 plasma membrane	PF03832.10 WSK	IPR001573 Protein kinase A anchoring, WSK motif | IPR018459 RII binding domain | IPR028540 A-kinase anchor protein 12
ENSMUSG00000039997	499	1468	1.60091	Up	0.0247184	ENSMUST00000042228;ENSMUST00000081216;ENSMUST00000123708;ENSMUST00000156895;ENSMUST00000128430;ENSMUST00000129829;ENSMUST00000135331;ENSMUST00000138143;ENSMUST00000140143	Ifi203	protein_coding	interferon activated gene 203 [Source:MGI Symbol;Acc:MGI:96428]	ENSMUSP00000121480,ENSMUSP00000114221,ENSMUSP00000122424,ENSMUSP00000042071,ENSMUSP00000079976	gi|703491605|ref|NP_001289578.1|	interferon-activable protein 203 isoform 1 [Mus musculus]	sp|O35368|IFI3_MOUSE	Interferon-activable protein 203 OS=Mus musculus GN=Ifi203 PE=1 SV=1	--	--	--	--	mmu:15951	Ifi204, Ifi16, p204; interferon activated gene 204; K20914 gamma-interferon-inducible protein 16	GO:0035458 cellular response to interferon-beta	GO:0000978 RNA polymerase II core promoter proximal region sequence-specific DNA binding | GO:0042802 identical protein binding | GO:0001078 transcriptional repressor activity, RNA polymerase II core promoter proximal region sequence-specific binding | GO:0008134 transcription factor binding | GO:0001047 core promoter binding | GO:0044822 poly(A) RNA binding	GO:0005737 cytoplasm | GO:0005730 nucleolus | GO:0016020 membrane	PF02758.13 PYRIN	--
ENSMUSG00000030417	776	245	-1.61837	Down	0.0263391	ENSMUST00000118501;ENSMUST00000120714;ENSMUST00000151336;ENSMUST00000126734;ENSMUST00000127213;ENSMUST00000130306;ENSMUST00000130340	Pdcd5	protein_coding	programmed cell death 5 [Source:MGI Symbol;Acc:MGI:1913538]	ENSMUSP00000113761,ENSMUSP00000113013	gi|9790259|ref|NP_062720.1|	programmed cell death protein 5 [Mus musculus] >gi|6686019|sp|P56812.3|PDCD5_MOUSE RecName: Full=Programmed cell death protein 5; AltName: Full=TF-1 cell apoptosis-related protein 19; Short=Protein TFAR19 >gi|5596626|gb|AAD45607.1|AF161074_1 TF-1 apoptosis related protein 19 [Mus musculus] >gi|33525234|gb|AAH56167.1| Programmed cell death 5 [Mus musculus] >gi|55930858|gb|AAH48476.1| Programmed ce…	sp|P56812|PDCD5_MOUSE	Programmed cell death protein 5 OS=Mus musculus GN=Pdcd5 PE=1 SV=3	COG2118	80.5	General function prediction only ;	DNA-binding protein	mmu:100042424	Pdcd5-ps, Gm37810, Gm3837; programmed cell death 5, pseudogene; K06875 programmed cell death protein 5	GO:0010628 positive regulation of gene expression | GO:0090200 positive regulation of release of cytochrome c from mitochondria | GO:1903638 positive regulation of protein import into mitochondrial outer membrane | GO:0008285 negative regulation of cell proliferation | GO:0071560 cellular response to transforming growth factor beta stimulus | GO:1903645 negative regulation of chaperone-mediated p…	GO:0010698 acetyltransferase activator activity | GO:0008201 heparin binding | GO:0003677 DNA binding | GO:0048487 beta-tubulin binding	GO:0005737 cytoplasm | GO:0070062 extracellular exosome | GO:0005634 nucleus	PF01984.17 dsDNA_bind	IPR002836 PDCD5-related protein
ENSMUSG00000037225	417	1239	1.61518	Up	0.0238534	ENSMUST00000138563;ENSMUST00000200585;ENSMUST00000038885;ENSMUST00000150021;ENSMUST00000145228;ENSMUST00000108120;ENSMUST00000091203;ENSMUST00000199938	Fgf2	protein_coding	fibroblast growth factor 2 [Source:MGI Symbol;Acc:MGI:95516]	ENSMUSP00000122227,ENSMUSP00000143094,ENSMUSP00000037694,ENSMUSP00000103755,ENSMUSP00000088742	gi|7106315|ref|NP_032032.1|	fibroblast growth factor 2 precursor [Mus musculus] >gi|122743|sp|P15655.1|FGF2_MOUSE RecName: Full=Fibroblast growth factor 2; Short=FGF-2; AltName: Full=Basic fibroblast growth factor; Short=bFGF; AltName: Full=Heparin-binding growth factor 2; Short=HBGF-2; Flags: Precursor >gi|309239|gb|AAA37621.1| basic fibroblast growth factor [Mus musculus] >gi|3158434|gb|AAC17503.1| basic fibroblast growth…	sp|P15655|FGF2_MOUSE	Fibroblast growth factor 2 OS=Mus musculus GN=Fgf2 PE=1 SV=1	--	--	--	--	mmu:14173	Fgf2, Fgf-2, Fgfb, bFGF; fibroblast growth factor 2; K18497 fibroblast growth factor 2	GO:0060644 mammary gland epithelial cell differentiation | GO:0000186 activation of MAPKK activity | GO:0021940 positive regulation of cerebellar granule cell precursor proliferation | GO:0060591 chondroblast differentiation | GO:0060978 angiogenesis involved in coronary vascular morphogenesis | GO:0051209 release of sequestered calcium ion into cytosol | GO:0060128 corticotropin hormone secretin…	GO:0008083 growth factor activity | GO:0042056 chemoattractant activity | GO:0030374 ligand-dependent nuclear receptor transcription coactivator activity | GO:0008201 heparin binding | GO:0005125 cytokine activity | GO:0005104 fibroblast growth factor receptor binding	GO:0005737 cytoplasm | GO:0005634 nucleus | GO:0005615 extracellular space	PF00167.15 FGF	IPR002209 Fibroblast growth factor family | IPR008996 Cytokine, IL-1-like | IPR028142 IL-1 family/FGF family | IPR028223 Fibroblast growth factor 2
ENSMUSG00000029379	155	536	1.83353	Up	0.00744766	ENSMUST00000031326;ENSMUST00000201840	Cxcl3	protein_coding	chemokine (C-X-C motif) ligand 3 [Source:MGI Symbol;Acc:MGI:3037818]	ENSMUSP00000031326	gi|42600573|ref|NP_976065.1|	C-X-C motif chemokine 3 precursor [Mus musculus] >gi|81893097|sp|Q6W5C0.1|CXCL3_MOUSE RecName: Full=C-X-C motif chemokine 3; AltName: Full=Dendritic cell inflammatory protein 1; Flags: Precursor >gi|36939028|gb|AAQ86936.1| dendritic cell inflammatory protein-1 precursor [Mus musculus] >gi|36939030|gb|AAQ86937.1| dendritic cell inflammatory protein-1 precursor [Mus musculus] >gi|111599599|gb|AAI17…	sp|Q6W5C0|CXCL3_MOUSE	C-X-C motif chemokine 3 OS=Mus musculus GN=Cxcl3 PE=2 SV=1	--	--	--	--	mmu:330122	Cxcl3, Dcip1, Gm1960; chemokine (C-X-C motif) ligand 3; K05505 C-X-C motif chemokine 1/2/3	GO:0007186 G-protein coupled receptor signaling pathway | GO:0070997 neuron death | GO:0042127 regulation of cell proliferation | GO:0007204 positive regulation of cytosolic calcium ion concentration | GO:0010332 response to gamma radiation | GO:0071347 cellular response to interleukin-1 | GO:0001975 response to amphetamine | GO:0090023 positive regulation of neutrophil chemotaxis | GO:0006955 im…	GO:0008009 chemokine activity | GO:0045236 CXCR chemokine receptor binding	GO:0005615 extracellular space | GO:0005829 cytosol	PF00048.17 IL8	IPR001089 CXC chemokine | IPR001811 Chemokine interleukin-8-like domain | IPR018048 CXC chemokine, conserved site
ENSMUSG00000045502	95	283	1.61792	Up	0.039595	ENSMUST00000057145	Hcar2	protein_coding	hydroxycarboxylic acid receptor 2 [Source:MGI Symbol;Acc:MGI:1933383]	ENSMUSP00000054104	gi|13507640|ref|NP_109626.1|	hydroxycarboxylic acid receptor 2 [Mus musculus] >gi|81917230|sp|Q9EP66.1|HCAR2_MOUSE RecName: Full=Hydroxycarboxylic acid receptor 2; AltName: Full=G-protein coupled receptor 109; AltName: Full=G-protein coupled receptor 109A; AltName: Full=G-protein coupled receptor HM74; AltName: Full=Niacin receptor 1; AltName: Full=Nicotinic acid receptor; AltName: Full=Protein PUMA-G >gi|111308825|gb|AAI207…	sp|Q9EP66|HCAR2_MOUSE	Hydroxycarboxylic acid receptor 2 OS=Mus musculus GN=Hcar2 PE=1 SV=1	--	--	--	--	mmu:80885	Hcar2, Gpr109a, Gpr109b, HM74, Niacr1, PUMA-G, Pumag, mHM74b; hydroxycarboxylic acid receptor 2; K08402 G protein-coupled receptor 109	GO:0007186 G-protein coupled receptor signaling pathway | GO:0050995 negative regulation of lipid catabolic process | GO:0033031 positive regulation of neutrophil apoptotic process | GO:0035590 purinergic nucleotide receptor signaling pathway | GO:0070165 positive regulation of adiponectin secretion	GO:0005525 GTP binding | GO:0001614 purinergic nucleotide receptor activity | GO:0070553 nicotinic acid receptor activity	GO:0016021 integral component of membrane | GO:0030054 cell junction | GO:0005886 plasma membrane	PF00001.18 7tm_1	IPR000276 G protein-coupled receptor, rhodopsin-like | IPR017452 GPCR, rhodopsin-like, 7TM | IPR028017 Hydroxycarboxylic acid receptor 2/3
ENSMUSG00000093877	41	7	-2.48509	Down	0.037489	ENSMUST00000209029;ENSMUST00000214383;ENSMUST00000213549;ENSMUST00000208066;ENSMUST00000086319;ENSMUST00000209097;ENSMUST00000207624;ENSMUST00000208207;ENSMUST00000207055;ENSMUST00000208623	Olfr1348	protein_coding	olfactory receptor 1348 [Source:MGI Symbol;Acc:MGI:3031182]	ENSMUSP00000146802,ENSMUSP00000150969,ENSMUSP00000150128,ENSMUSP00000146558,ENSMUSP00000147205,ENSMUSP00000146853,ENSMUSP00000146873,ENSMUSP00000146621,ENSMUSP00000146811,ENSMUSP00000083499	gi|22129067|ref|NP_667124.1|	olfactory receptor 1348 [Mus musculus] >gi|18479648|gb|AAL60838.1| olfactory receptor MOR103-9 [Mus musculus] >gi|32078204|gb|AAP71731.1| olfactory receptor Olfr1348 [Mus musculus] >gi|111308731|gb|AAI20571.1| Olfactory receptor 1348 [Mus musculus] >gi|148699374|gb|EDL31321.1| mCG63662 [Mus musculus] >gi|187953709|gb|AAI37837.1| Olfactory receptor 1348 [Mus musculus]	sp|Q60889|OLF5_MOUSE	Olfactory receptor 5 OS=Mus musculus GN=Olfr5 PE=2 SV=2	--	--	--	--	mmu:258915	Olfr1348, MOR103-9; olfactory receptor 1348; K04257 olfactory receptor	GO:0007166 cell surface receptor signaling pathway | GO:0050911 detection of chemical stimulus involved in sensory perception of smell | GO:0007186 G-protein coupled receptor signaling pathway	GO:0004930 G-protein coupled receptor activity | GO:0004984 olfactory receptor activity	GO:0005887 integral component of plasma membrane	PF13853.3 7tm_4	IPR000276 G protein-coupled receptor, rhodopsin-like | IPR000725 Olfactory receptor | IPR017452 GPCR, rhodopsin-like, 7TM
ENSMUSG00000061991	1959	673	-1.49685	Down	0.0449466	ENSMUST00000073261	H2ac10	protein_coding	H2A clustered histone 10 [Source:MGI Symbol;Acc:MGI:2448309]	ENSMUSP00000072989	gi|537211922|gb|ERE80724.1|	histone H2A type 1-F-like protein [Cricetulus griseus]	sp|Q8CGP5|H2A1F_MOUSE	Histone H2A type 1-F OS=Mus musculus GN=Hist1h2af PE=1 SV=3	COG5262	197	Chromatin structure and dynamics ;	Histone H2A	cge:100750550	histone H2A type 1-F; K11251 histone H2A	GO:0006342 chromatin silencing	GO:0003677 DNA binding | GO:0046982 protein heterodimerization activity	GO:0000786 nucleosome | GO:0000790 nuclear chromatin	PF00125.21 Histone	IPR002119 Histone H2A | IPR007125 Histone H2A/H2B/H3 | IPR009072 Histone-fold | IPR032454 Histone H2A, C-terminal domain | IPR032458 Histone H2A conserved site
ENSMUSG00000089665	27	3	-3.07427	Down	0.0366202	ENSMUST00000159364	Fcor	protein_coding	Foxo1 corepressor [Source:MGI Symbol;Acc:MGI:1915484]	ENSMUSP00000146366	gi|391359274|sp|P0DJI6.1|FCOR_MOUSE	RecName: Full=Foxo1-corepressor; Short=FCoR; AltName: Full=Foxo1 CoRepressor >gi|148689998|gb|EDL21945.1| mCG1048501 [Mus musculus]	sp|P0DJI6|FCOR_MOUSE	Foxo1-corepressor OS=Mus musculus GN=Fcor PE=1 SV=1	--	--	--	--	--	--	GO:2000505 regulation of energy homeostasis | GO:0001659 temperature homeostasis | GO:0045444 fat cell differentiation | GO:0006473 protein acetylation | GO:0045892 negative regulation of transcription, DNA-templated | GO:0070417 cellular response to cold | GO:0001678 cellular glucose homeostasis | GO:0009267 cellular response to starvation	GO:0008951 palmitoleoyl [acyl-carrier-protein]-dependent acyltransferase activity | GO:0034738 lanosterol O-acyltransferase activity | GO:0034915 2-methylhexanoyl-CoA C-acetyltransferase activity | GO:0034737 ergosterol O-acyltransferase activity | GO:0005515 protein binding | GO:0018713 3-ketopimelyl-CoA thiolase activity | GO:0034945 2,6-dimethyl-5-methylene-3-oxo-heptanoyl-CoA C-acetyltransfer…	GO:0005829 cytosol | GO:0005634 nucleus | GO:0005739 mitochondrion	--	--
ENSMUSG00000029797	33	167	2.37925	Up	0.000728138	ENSMUST00000212740;ENSMUST00000169350;ENSMUST00000043676;ENSMUST00000189910;ENSMUST00000185370;ENSMUST00000188970	Sspo	protein_coding	SCO-spondin [Source:MGI Symbol;Acc:MGI:2674311]	ENSMUSP00000047991,ENSMUSP00000140642,ENSMUSP00000139484,ENSMUSP00000131401,ENSMUSP00000148570	gi|345842432|ref|NP_775604.3|	SCO-spondin precursor [Mus musculus]	sp|Q8CG65|SSPO_MOUSE	SCO-spondin OS=Mus musculus GN=Sspo PE=2 SV=2	--	--	--	--	sko:100372082	mucin-2-like; K21125 mucin-5AC	GO:0007155 cell adhesion	GO:0005179 hormone activity	GO:0005576 extracellular region | GO:0005737 cytoplasm	PF00094.22 VWD	IPR000421 Coagulation factor 5/8 C-terminal domain | IPR000884 Thrombospondin type-1 (TSP1) repeat | IPR001007 VWFC domain | IPR001846 von Willebrand factor, type D domain | IPR002172 Low-density lipoprotein (LDL) receptor class A repeat | IPR002919 Trypsin Inhibitor-like, cysteine rich domain | IPR006207 Cystine knot, C-terminal | IPR008979 Galactose-binding domain-like | IPR014853 Uncharacteris…
ENSMUSG00000032739	40	4	-3.23836	Down	0.00557704	ENSMUST00000052079;ENSMUST00000116619;ENSMUST00000166215	Pram1	protein_coding	PML-RAR alpha-regulated adaptor molecule 1 [Source:MGI Symbol;Acc:MGI:3576625]	ENSMUSP00000057065,ENSMUSP00000112318	gi|255308896|ref|NP_001002842.2|	PML-RARA-regulated adapter molecule 1 [Mus musculus] >gi|341941657|sp|Q6BCL1.2|PRAM_MOUSE RecName: Full=PML-RARA-regulated adapter molecule 1; Short=PRAM-1	sp|Q6BCL1|PRAM_MOUSE	PML-RARA-regulated adapter molecule 1 OS=Mus musculus GN=Pram1 PE=1 SV=2	--	--	--	--	mmu:378460	Pram1, AY665714; PML-RAR alpha-regulated adaptor molecule 1; K19994 PML-RARA-regulated adapter molecule 1	GO:0043313 regulation of neutrophil degranulation | GO:0007229 integrin-mediated signaling pathway	GO:0008289 lipid binding	--	PF14603.3 hSH3	--
ENSMUSG00000078154	50	0	-8.62548	Down	8.02472e-07	ENSMUST00000104959	Gm12184	protein_coding	predicted gene 12184 [Source:MGI Symbol;Acc:MGI:3652174]	ENSMUSP00000100565	gi|49355794|ref|NP_038840.2|	cyclin-dependent kinase 2-associated protein 1 [Mus musculus] >gi|166091521|ref|NP_001107223.1| cyclin-dependent kinase 2-associated protein 1 [Rattus norvegicus] >gi|528078267|ref|NP_001268620.1| cyclin-dependent kinase 2-associated protein 1 [Mesocricetus auratus] >gi|52789351|gb|AAH83075.1| CDK2 (cyclin-dependent kinase 2)-associated protein 1 [Mus musculus] >gi|74355548|gb|AAI03773.1| CDK2 (c…	sp|P49119|CDKA1_MESAU	Cyclin-dependent kinase 2-associated protein 1 OS=Mesocricetus auratus GN=CDK2AP1 PE=2 SV=1	--	--	--	--	tng:GSTEN00025265G001	unnamed protein product; K16775 M-phase phosphoprotein 9	GO:0007049 cell cycle | GO:0060325 face morphogenesis | GO:0006261 DNA-dependent DNA replication | GO:0001934 positive regulation of protein phosphorylation | GO:0001701 in utero embryonic development	GO:0070182 DNA polymerase binding	GO:0048471 perinuclear region of cytoplasm | GO:0005634 nucleus	PF09806.6 CDK2AP	IPR017266 Cyclin-dependent kinase 2-associated protein 2 | IPR019187 Cyclin-dependent kinase 2-associated protein
ENSMUSG00000028851	454	115	-1.9355	Down	0.0044011	ENSMUST00000030665;ENSMUST00000141860;ENSMUST00000148612	Nudc	protein_coding	nudC nuclear distribution protein [Source:MGI Symbol;Acc:MGI:106014]	ENSMUSP00000030665	gi|6754910|ref|NP_035078.1|	nuclear migration protein nudC [Mus musculus] >gi|62286986|sp|O35685.1|NUDC_MOUSE RecName: Full=Nuclear migration protein nudC; AltName: Full=Nuclear distribution protein C homolog; AltName: Full=Silica-induced gene 92 protein; Short=SIG-92 >gi|2654358|emb|CAA75677.1| MNUDC protein [Mus musculus] >gi|2808636|emb|CAA57201.1| Sig 92 [Mus musculus] >gi|15030022|gb|AAH11253.1| Nuclear distribution ge…	sp|O35685|NUDC_MOUSE	Nuclear migration protein nudC OS=Mus musculus GN=Nudc PE=1 SV=1	--	--	--	--	--	--	GO:0007067 mitotic nuclear division | GO:0007097 nuclear migration | GO:0043434 response to peptide hormone | GO:0051301 cell division	GO:0005515 protein binding	GO:0005794 Golgi apparatus | GO:0005634 nucleus | GO:0005874 microtubule	PF14050.3 Nudc_N	IPR007052 CS domain | IPR008978 HSP20-like chaperone | IPR025934 NudC N-terminal domain | IPR032572 Nuclear migration protein nudC
ENSMUSG00000032313	128	460	1.88886	Up	0.00542559	ENSMUST00000085754;ENSMUST00000034862;ENSMUST00000130465	Tmem266	protein_coding	transmembrane protein 266 [Source:MGI Symbol;Acc:MGI:2142980]	ENSMUSP00000082906,ENSMUSP00000034862	gi|27370422|ref|NP_766511.1|	transmembrane protein 266 [Mus musculus] >gi|122065159|sp|Q8BZB3.3|TM266_MOUSE RecName: Full=Transmembrane protein 266 >gi|148693903|gb|EDL25850.1| expressed sequence AI118078 [Mus musculus]	sp|Q8BZB3|TM266_MOUSE	Transmembrane protein 266 OS=Mus musculus GN=Tmem266 PE=1 SV=3	--	--	--	--	tng:GSTEN00015949G001	unnamed protein product; K17382 serine beta-lactamase-like protein LACTB, mitochondrial	--	--	GO:0016021 integral component of membrane | GO:0005886 plasma membrane	--	IPR027359 Voltage-dependent channel, four helix bundle domain
ENSMUSG00000037801	26	1	-4.49559	Down	0.00542559	ENSMUST00000042322;ENSMUST00000163982;ENSMUST00000163624;ENSMUST00000080527;ENSMUST00000171243;ENSMUST00000170960	Iqch	protein_coding	IQ motif containing H [Source:MGI Symbol;Acc:MGI:1925500]	ENSMUSP00000047953,ENSMUSP00000126546,ENSMUSP00000128482,ENSMUSP00000079370,ENSMUSP00000131828	gi|902763153|ref|NP_001298027.1|	IQ domain-containing protein H isoform 1 [Mus musculus] >gi|408360257|sp|Q9D2K4.3|IQCH_MOUSE RecName: Full=IQ domain-containing protein H >gi|148694094|gb|EDL26041.1| mCG130196, isoform CRA_a [Mus musculus]	sp|Q9D2K4|IQCH_MOUSE	IQ domain-containing protein H OS=Mus musculus GN=Iqch PE=2 SV=3	--	--	--	--	ame:413294	GB19025; uncharacterized LOC413294; K15104 solute carrier family 25 (mitochondrial oxoglutarate transporter), member 11	--	--	--	--	IPR000048 IQ motif, EF-hand binding site
ENSMUSG00000021520	1371	264	-2.33166	Down	6.63361e-05	ENSMUST00000021993;ENSMUST00000174606	Uqcrb	protein_coding	ubiquinol-cytochrome c reductase binding protein [Source:MGI Symbol;Acc:MGI:1914780]	ENSMUSP00000021993	gi|13385726|ref|NP_080495.1|	cytochrome b-c1 complex subunit 7 [Mus musculus] >gi|56541056|gb|AAH86921.1| Ubiquinol-cytochrome c reductase binding protein [Mus musculus] >gi|72679971|gb|AAI00602.1| Ubiquinol-cytochrome c reductase binding protein [Mus musculus] >gi|148678386|gb|EDL10333.1| mCG67985 [Mus musculus]	sp|Q9D855|QCR7_MOUSE	Cytochrome b-c1 complex subunit 7 OS=Mus musculus GN=Uqcrb PE=1 SV=3	--	--	--	--	mmu:67530	Uqcrb, 2210415M14Rik, QP-C, QPC, UQBC, UQBP, UQPC; ubiquinol-cytochrome c reductase binding protein; K00417 ubiquinol-cytochrome c reductase subunit 7	GO:0006810 transport | GO:0051291 protein heterooligomerization | GO:0006122 mitochondrial electron transport, ubiquinol to cytochrome c	GO:0032403 protein complex binding	GO:0005750 mitochondrial respiratory chain complex III	PF02271.13 UCR_14kD	IPR003197 Cytochrome b-c1 complex subunit 7
ENSMUSG00000008999	14	996	6.18422	Up	3.94303e-23	ENSMUST00000009143;ENSMUST00000137247	Bmp7	protein_coding	bone morphogenetic protein 7 [Source:MGI Symbol;Acc:MGI:103302]	ENSMUSP00000009143	gi|31982487|ref|NP_031583.2|	bone morphogenetic protein 7 preproprotein [Mus musculus] >gi|300797852|ref|NP_001178785.1| bone morphogenetic protein 7 precursor [Rattus norvegicus] >gi|20141215|sp|P23359.2|BMP7_MOUSE RecName: Full=Bone morphogenetic protein 7; Short=BMP-7; AltName: Full=Osteogenic protein 1; Short=OP-1; Flags: Precursor >gi|14789714|gb|AAH10771.1| Bone morphogenetic protein 7 [Mus musculus] >gi|148674663|gb|E…	sp|P23359|BMP7_MOUSE	Bone morphogenetic protein 7 OS=Mus musculus GN=Bmp7 PE=1 SV=2	--	--	--	--	rno:85272	Bmp7, BMP-7; bone morphogenetic protein 7; K16621 bone morphogenetic protein 7	GO:0043065 positive regulation of apoptotic process | GO:0030326 embryonic limb morphogenesis | GO:1900106 positive regulation of hyaluranon cable assembly | GO:0030501 positive regulation of bone mineralization | GO:0045665 negative regulation of neuron differentiation | GO:0072133 metanephric mesenchyme morphogenesis | GO:0007411 axon guidance | GO:0045669 positive regulation of osteoblast diff…	GO:0008201 heparin binding | GO:0008083 growth factor activity | GO:0005160 transforming growth factor beta receptor binding | GO:0005125 cytokine activity | GO:0070700 BMP receptor binding	GO:0005615 extracellular space | GO:0031988 membrane-bounded vesicle | GO:0031012 extracellular matrix	PF00688.15 TGFb_propeptide	IPR001111 Transforming growth factor-beta, N-terminal | IPR001839 Transforming growth factor-beta, C-terminal | IPR015615 Transforming growth factor-beta-related | IPR017948 Transforming growth factor beta, conserved site | IPR029034 Cystine-knot cytokine
ENSMUSG00000030752	7	54	2.96931	Up	0.00275567	ENSMUST00000033010;ENSMUST00000135129	Kdm8	protein_coding	lysine (K)-specific demethylase 8 [Source:MGI Symbol;Acc:MGI:1924285]	ENSMUSP00000033010,ENSMUSP00000114890	gi|21313318|ref|NP_084118.1|	lysine-specific demethylase 8 [Mus musculus] >gi|81904357|sp|Q9CXT6.1|KDM8_MOUSE RecName: Full=Lysine-specific demethylase 8; AltName: Full=JmjC domain-containing protein 5; AltName: Full=Jumonji domain-containing protein 5 >gi|19354524|gb|AAH24807.1| Jumonji domain containing 5 [Mus musculus] >gi|148685371|gb|EDL17318.1| jumonji domain containing 5 [Mus musculus]	sp|Q9CXT6|KDM8_MOUSE	Lysine-specific demethylase 8 OS=Mus musculus GN=Kdm8 PE=2 SV=1	--	--	--	--	mmu:77035	Kdm8, 3110005O21Rik, Jmjd5; lysine (K)-specific demethylase 8; K10277 lysine-specific demethylase 8 [EC:1.14.11.27]	GO:0045893 positive regulation of transcription, DNA-templated | GO:0055114 oxidation-reduction process | GO:0000086 G2/M transition of mitotic cell cycle | GO:0070544 histone H3-K36 demethylation	GO:0051864 histone demethylase activity (H3-K36 specific) | GO:0046872 metal ion binding | GO:0003682 chromatin binding	GO:0005634 nucleus	PF13621.3 Cupin_8	--
ENSMUSG00000029372	723	3111	2.14953	Up	0.000282754	ENSMUST00000031319	Ppbp	protein_coding	pro-platelet basic protein [Source:MGI Symbol;Acc:MGI:1888712]	ENSMUSP00000031319	gi|12963823|ref|NP_076274.1|	platelet basic protein precursor [Mus musculus] >gi|11526800|gb|AAG36786.1|AF219112_1 thymus chemokine 1 [Mus musculus] >gi|13560694|gb|AAK30162.1|AF349465_2 platelet basic protein [Mus musculus] >gi|14582376|gb|AAK69476.1|AF278700_1 thymus chemokine 1 [Mus musculus] >gi|18253081|dbj|BAB83941.1| chemokine subfamily B Cys-X-Cys [Mus musculus] >gi|117558394|gb|AAI27045.1| Pro-platelet basic protein…	sp|P43030|CXCL7_PIG	Platelet basic protein OS=Sus scrofa GN=PPBP PE=1 SV=1	--	--	--	--	mmu:57349	Ppbp, 2400003M24Rik, AI854500, CTAP3, CTAPIII, Cxcl7, LA-PF4, LDGF, MDGF, NAP-2, NAP-2-L1, Scyb7, TGB, TGB1, THBGB1, b-TG1, beta-TG; pro-platelet basic protein; K10029 platelet basic protein	GO:0006955 immune response | GO:0002690 positive regulation of leukocyte chemotaxis | GO:0042127 regulation of cell proliferation | GO:0070098 chemokine-mediated signaling pathway | GO:0002523 leukocyte migration involved in inflammatory response | GO:0007186 G-protein coupled receptor signaling pathway | GO:0032496 response to lipopolysaccharide	GO:0045236 CXCR chemokine receptor binding | GO:0008009 chemokine activity	GO:0005615 extracellular space	PF00048.17 IL8	IPR001089 CXC chemokine | IPR001811 Chemokine interleukin-8-like domain | IPR027223 Platelet basic protein
ENSMUSG00000023036	72	317	2.18085	Up	0.000997005	ENSMUST00000066140;ENSMUST00000195239;ENSMUST00000193222	Pcdhgc4	protein_coding	protocadherin gamma subfamily C, 4 [Source:MGI Symbol;Acc:MGI:1935203]	ENSMUSP00000068846,ENSMUSP00000141244	gi|18087749|ref|NP_291060.1|	protocadherin gamma-C4 [Mus musculus] >gi|13876362|gb|AAK26101.1| protocadherin gamma C4 [Mus musculus] >gi|40673932|gb|AAH64808.1| Protocadherin gamma subfamily C, 4 [Mus musculus] >gi|148678188|gb|EDL10135.1| mCG133388, isoform CRA_r [Mus musculus]	sp|Q9Y5F7|PCDGL_HUMAN	Protocadherin gamma-C4 OS=Homo sapiens GN=PCDHGC4 PE=2 SV=1	--	--	--	--	mmu:93707	Pcdhgc4; protocadherin gamma subfamily C, 4; K16497 protocadherin gamma subfamily C	GO:0007156 homophilic cell adhesion via plasma membrane adhesion molecules | GO:0050808 synapse organization	GO:0005509 calcium ion binding	GO:0016021 integral component of membrane | GO:0005886 plasma membrane	PF08266.9 Cadherin_2	IPR002126 Cadherin | IPR013164 Cadherin, N-terminal | IPR015919 Cadherin-like | IPR020894 Cadherin conserved site | IPR031904 Cadherin, C-terminal catenin-binding domain
ENSMUSG00000024987	28	99	1.86169	Up	0.0449466	ENSMUST00000025946;ENSMUST00000236500	Cyp26a1	protein_coding	cytochrome P450, family 26, subfamily a, polypeptide 1 [Source:MGI Symbol;Acc:MGI:1096359]	ENSMUSP00000025946	gi|178057351|ref|NP_031837.2|	cytochrome P450 26A1 [Mus musculus] >gi|15215125|gb|AAH12673.1| Cytochrome P450, family 26, subfamily a, polypeptide 1 [Mus musculus] >gi|148709847|gb|EDL41793.1| cytochrome P450, family 26, subfamily a, polypeptide 1 [Mus musculus]	sp|O55127|CP26A_MOUSE	Cytochrome P450 26A1 OS=Mus musculus GN=Cyp26a1 PE=2 SV=1	COG2124	261	Secondary metabolites biosynthesis, transport and catabolism ;	Cytochrome P450	mmu:13082	Cyp26a1, Cyp26, P450RA, P450RAI, RAH; cytochrome P450, family 26, subfamily a, polypeptide 1; K07437 cytochrome P450 family 26 subfamily A	GO:0007417 central nervous system development | GO:0048384 retinoic acid receptor signaling pathway | GO:0014032 neural crest cell development | GO:0034653 retinoic acid catabolic process | GO:0009952 anterior/posterior pattern specification | GO:0055114 oxidation-reduction process	GO:0018595 alpha-pinene monooxygenase activity | GO:0034862 2,6-dihydroxybenzothiazole monooxygenase activity | GO:0034870 pinacolone 5-monooxygenase activity | GO:0001972 retinoic acid binding | GO:0018592 4-nitrocatechol 4-monooxygenase activity | GO:0034888 endosulfan monooxygenase I activity | GO:0034929 1-hydroxypyrene 7,8-monooxygenase activity | GO:0034858 2-hydroxybenzothiazole monooxygen…	GO:0016020 membrane | GO:0005783 endoplasmic reticulum	PF00067.19 p450	IPR001128 Cytochrome P450 | IPR002403 Cytochrome P450, E-class, group IV | IPR017972 Cytochrome P450, conserved site
ENSMUSG00000055799	105	28	-1.85789	Down	0.0445592	ENSMUST00000069536;ENSMUST00000114053;ENSMUST00000141743;ENSMUST00000149446;ENSMUST00000182651	Tcf7l1	protein_coding	transcription factor 7 like 1 (T cell specific, HMG box) [Source:MGI Symbol;Acc:MGI:1202876]	ENSMUSP00000069403,ENSMUSP00000109687,ENSMUSP00000115060	gi|119703758|ref|NP_001073290.1|	transcription factor 7-like 1 isoform 1 [Mus musculus] >gi|118764039|gb|AAI28306.1| Transcription factor 3 [Mus musculus]	sp|Q9Z1J1|TF7L1_MOUSE	Transcription factor 7-like 1 OS=Mus musculus GN=Tcf7l1 PE=1 SV=2	--	--	--	--	cge:100753225	Tcf7l1; transcription factor 7 like 1; K04490 transcription factor 7-like 1	GO:0046022 positive regulation of transcription from RNA polymerase II promoter during mitosis | GO:0045892 negative regulation of transcription, DNA-templated | GO:0048319 axial mesoderm morphogenesis | GO:0008595 anterior/posterior axis specification, embryo | GO:2000036 regulation of stem cell population maintenance | GO:0043588 skin development | GO:0035019 somatic stem cell population mainte…	GO:0044212 transcription regulatory region DNA binding | GO:0043565 sequence-specific DNA binding | GO:0003682 chromatin binding | GO:0008013 beta-catenin binding | GO:0003700 transcription factor activity, sequence-specific DNA binding	GO:0005667 transcription factor complex | GO:0005634 nucleus	PF08347.8 CTNNB1_binding	IPR009071 High mobility group box domain | IPR013558 CTNNB1 binding, N-teminal | IPR024940 Transcription factor TCF/LEF | IPR027397 Catenin binding domain | IPR028778 Transcription factor 7-like 1
ENSMUSG00000060093	3960	903	-2.08814	Down	0.00048511	ENSMUST00000102964	H4c1	protein_coding	H4 clustered histone 1 [Source:MGI Symbol;Acc:MGI:2448419]	ENSMUSP00000100029	gi|1007715256|ref|XP_015799297.1|	PREDICTED: histone H4-like [Nothobranchius furzeri]	sp|Q28DR4|H4_XENTR	Histone H4 OS=Xenopus tropicalis GN=TGas006m08.1 PE=3 SV=1	COG2036	162	Chromatin structure and dynamics ;	Histones H3 and H4	cmk:103172236	histone H4; K11254 histone H4	GO:0000278 mitotic cell cycle | GO:0031047 gene silencing by RNA | GO:0045815 positive regulation of gene expression, epigenetic | GO:0000183 chromatin silencing at rDNA | GO:0000724 double-strand break repair via homologous recombination | GO:1904837 beta-catenin-TCF complex assembly | GO:0006303 double-strand break repair via nonhomologous end joining | GO:0051290 protein heterotetramerization …	GO:0035575 histone demethylase activity (H4-K20 specific) | GO:0042393 histone binding | GO:0044822 poly(A) RNA binding | GO:0046982 protein heterodimerization activity | GO:0019904 protein domain specific binding | GO:0003677 DNA binding	GO:0005654 nucleoplasm | GO:0016020 membrane | GO:0000784 nuclear chromosome, telomeric region | GO:0000786 nucleosome | GO:0070062 extracellular exosome	PF15511.3 CENP-T_C	IPR001951 Histone H4 | IPR004823 TATA box binding protein associated factor (TAF) | IPR009072 Histone-fold | IPR019809 Histone H4, conserved site
ENSMUSG00000073616	589	139	-2.0378	Down	0.00162671	ENSMUST00000154129;ENSMUST00000112999;ENSMUST00000148508;ENSMUST00000097642;ENSMUST00000129730	Cops9	protein_coding	COP9 signalosome subunit 9 [Source:MGI Symbol;Acc:MGI:1914165]	ENSMUSP00000108623,ENSMUSP00000123716,ENSMUSP00000095247	gi|148708053|gb|EDL40000.1|	mCG20113, isoform CRA_d [Mus musculus]	sp|Q3U898|MYOV2_MOUSE	Myeloma-overexpressed gene 2 protein homolog OS=Mus musculus GN=Myeov2 PE=1 SV=1	--	--	--	--	--	--	--	--	--	PF15004.3 MYEOV2	IPR029391 Myeloma-overexpressed 2-like
ENSMUSG00000063727	8	41	2.38358	Up	0.0445592	ENSMUST00000079772	Tnfrsf11b	protein_coding	tumor necrosis factor receptor superfamily, member 11b (osteoprotegerin) [Source:MGI Symbol;Acc:MGI:109587]	ENSMUSP00000078705	gi|113930716|ref|NP_032790.3|	tumor necrosis factor receptor superfamily member 11B precursor [Mus musculus] >gi|21264085|sp|O08712.1|TR11B_MOUSE RecName: Full=Tumor necrosis factor receptor superfamily member 11B; AltName: Full=Osteoclastogenesis inhibitory factor; AltName: Full=Osteoprotegerin; Flags: Precursor >gi|2072183|gb|AAB53708.1| osteoprotegerin [Mus musculus]	sp|O08712|TR11B_MOUSE	Tumor necrosis factor receptor superfamily member 11B OS=Mus musculus GN=Tnfrsf11b PE=1 SV=1	--	--	--	--	mmu:18383	Tnfrsf11b, OCIF, Opg, TR1; tumor necrosis factor receptor superfamily, member 11b (osteoprotegerin); K05148 tumor necrosis factor receptor superfamily member 11B	GO:0032496 response to lipopolysaccharide | GO:0042127 regulation of cell proliferation | GO:0042981 regulation of apoptotic process | GO:0032026 response to magnesium ion | GO:0030198 extracellular matrix organization | GO:0043627 response to estrogen | GO:0006955 immune response | GO:0045779 negative regulation of bone resorption | GO:0046685 response to arsenic-containing substance | GO:003320…	GO:0005125 cytokine activity | GO:0005031 tumor necrosis factor-activated receptor activity	GO:0005887 integral component of plasma membrane | GO:0005615 extracellular space | GO:0005578 proteinaceous extracellular matrix	PF00020.15 TNFR_c6	IPR000488 Death domain | IPR001368 TNFR/NGFR cysteine-rich region | IPR011029 Death-like domain | IPR011641 Tyrosine-protein kinase ephrin type A/B receptor-like | IPR017371 Tumour necrosis factor receptor 11B | IPR022323 Tumour necrosis factor receptor 11
ENSMUSG00000055148	204	41	-2.26703	Down	0.00127282	ENSMUST00000067912	Klf2	protein_coding	Kruppel-like factor 2 (lung) [Source:MGI Symbol;Acc:MGI:1342772]	ENSMUSP00000064823	gi|170784840|ref|NP_032478.2|	Krueppel-like factor 2 [Mus musculus] >gi|341940872|sp|Q60843.2|KLF2_MOUSE RecName: Full=Krueppel-like factor 2; AltName: Full=Lung krueppel-like factor >gi|187951171|gb|AAI38739.1| Kruppel-like factor 2 (lung) [Mus musculus] >gi|187954041|gb|AAI38738.1| Kruppel-like factor 2 (lung) [Mus musculus]	sp|Q60843|KLF2_MOUSE	Krueppel-like factor 2 OS=Mus musculus GN=Klf2 PE=1 SV=2	COG5048	74.3	General function prediction only ;	FOG: Zn-finger	mmu:16598	Klf2, Lklf; Kruppel-like factor 2 (lung); K17845 krueppel-like factor 2	GO:0036003 positive regulation of transcription from RNA polymerase II promoter in response to stress | GO:0071409 cellular response to cycloheximide | GO:0071347 cellular response to interleukin-1 | GO:0071356 cellular response to tumor necrosis factor | GO:0043249 erythrocyte maturation | GO:0070301 cellular response to hydrogen peroxide | GO:0000902 cell morphogenesis | GO:1901653 cellular res…	GO:0005515 protein binding | GO:0046872 metal ion binding | GO:0043565 sequence-specific DNA binding | GO:0003700 transcription factor activity, sequence-specific DNA binding	GO:0005634 nucleus	PF00096.23 zf-C2H2	IPR007087 Zinc finger, C2H2 | IPR013087 Zinc finger C2H2-type/integrase DNA-binding domain | IPR015880 Zinc finger, C2H2-like
ENSMUSG00000041453	18512	6193	-1.53532	Down	0.0324446	ENSMUST00000035983;ENSMUST00000154768;ENSMUST00000075453;ENSMUST00000099272;ENSMUST00000151871;ENSMUST00000135345	Rpl21	protein_coding	ribosomal protein L21 [Source:MGI Symbol;Acc:MGI:1278340]	ENSMUSP00000041652,ENSMUSP00000106213,ENSMUSP00000106211	gi|31560385|ref|NP_062621.2|	60S ribosomal protein L21 [Mus musculus] >gi|37231655|gb|AAH58459.1| Ribosomal protein L21 [Rattus norvegicus] >gi|55778719|gb|AAH86441.1| Ribosomal protein L21 [Rattus norvegicus] >gi|56541050|gb|AAH86905.1| Ribosomal protein L21 [Mus musculus] >gi|56541064|gb|AAH86935.1| Ribosomal protein L21 [Mus musculus] >gi|56541094|gb|AAH86904.1| Ribosomal protein L21 [Mus musculus] >gi|59808693|gb|AAH8958…	sp|P46778|RL21_HUMAN	60S ribosomal protein L21 OS=Homo sapiens GN=RPL21 PE=1 SV=2	COG2139	200	Translation, ribosomal structure and biogenesis ;	Ribosomal protein L21E	myb:102246943	60S ribosomal protein L21; K02889 large subunit ribosomal protein L21e	GO:0000184 nuclear-transcribed mRNA catabolic process, nonsense-mediated decay | GO:0006415 translational termination | GO:0006413 translational initiation | GO:0016259 selenocysteine metabolic process | GO:0006414 translational elongation | GO:0019083 viral transcription | GO:0006614 SRP-dependent cotranslational protein targeting to membrane | GO:0006364 rRNA processing	GO:0005515 protein binding | GO:0044822 poly(A) RNA binding | GO:0003735 structural constituent of ribosome	GO:0016020 membrane | GO:0022625 cytosolic large ribosomal subunit | GO:0005730 nucleolus	PF01157.15 Ribosomal_L21e	IPR001147 Ribosomal protein L21e | IPR008991 Translation protein SH3-like domain | IPR018259 Ribosomal protein L21e, conserved site
ENSMUSG00000117098	3098	947	-1.66536	Down	0.0139527	ENSMUST00000233357;ENSMUST00000233417	Gm49909	protein_coding	predicted gene, 49909 [Source:MGI Symbol;Acc:MGI:6270609]	ENSMUSP00000156883,ENSMUSP00000156594	gi|71037403|ref|NP_080340.2|	myosin light chain, regulatory B-like [Mus musculus] >gi|203097140|ref|NP_001128489.1| myosin regulatory light chain RLC-A [Rattus norvegicus] >gi|127170|sp|P13832.2|MRLCA_RAT RecName: Full=Myosin regulatory light chain RLC-A; Short=Myosin RLC-A; AltName: Full=Myosin regulatory light chain 2-A, smooth muscle isoform >gi|16307437|gb|AAH10265.1| RIKEN cDNA 2900073G15 gene [Mus musculus] >gi|2080997…	sp|P13832|MRLCA_RAT	Myosin regulatory light chain RLC-A OS=Rattus norvegicus GN=Rlc-a PE=2 SV=2	COG5126	110	Signal transduction mechanisms ; Cytoskeleton ; Cell cycle control, cell division, chromosome partitioning ; General function prediction only ;	Ca2+-binding protein (EF-Hand superfamily)	mmu:67268	Myl12a, 2900073G15Rik, AI838292, C80200; myosin, light chain 12A, regulatory, non-sarcomeric; K12757 myosin regulatory light chain 12	GO:0070527 platelet aggregation | GO:0008360 regulation of cell shape | GO:0072661 protein targeting to plasma membrane	GO:0005509 calcium ion binding | GO:0035254 glutamate receptor binding	GO:0030018 Z disc | GO:0070062 extracellular exosome | GO:0001725 stress fiber | GO:0016460 myosin II complex	PF13499.3 EF-hand_7	IPR002048 EF-hand domain | IPR011992 EF-hand domain pair | IPR018247 EF-Hand 1, calcium-binding site
ENSMUSG00000023885	18837	50449	1.46567	Up	0.0491322	ENSMUST00000170872;ENSMUST00000232616	Thbs2	protein_coding	thrombospondin 2 [Source:MGI Symbol;Acc:MGI:98738]	ENSMUSP00000128308	gi|239787900|ref|NP_035711.2|	thrombospondin-2 precursor [Mus musculus] >gi|342187084|sp|Q03350.2|TSP2_MOUSE RecName: Full=Thrombospondin-2; Flags: Precursor >gi|27464928|gb|AAO16244.1| Thbs2 [Mus musculus] >gi|148688534|gb|EDL20481.1| thrombospondin 2 [Mus musculus]	sp|Q03350|TSP2_MOUSE	Thrombospondin-2 OS=Mus musculus GN=Thbs2 PE=1 SV=2	--	--	--	--	mmu:21826	Thbs2, TSP2, Thbs-2; thrombospondin 2; K04659 thrombospondin 2/3/4/5	GO:0016525 negative regulation of angiogenesis | GO:0007155 cell adhesion | GO:0051965 positive regulation of synapse assembly	GO:0005509 calcium ion binding | GO:0005515 protein binding | GO:0008201 heparin binding	GO:0005604 basement membrane | GO:0031091 platelet alpha granule	PF00093.15 VWC	IPR000742 EGF-like domain | IPR000884 Thrombospondin type-1 (TSP1) repeat | IPR001007 VWFC domain | IPR001791 Laminin G domain | IPR001881 EGF-like calcium-binding domain | IPR003367 Thrombospondin, type 3-like repeat | IPR008859 Thrombospondin, C-terminal | IPR013032 EGF-like, conserved site | IPR013320 Concanavalin A-like lectin/glucanase domain | IPR015455 Thrombospondin-2 | IPR017897 Thrombos…
ENSMUSG00000052861	2	23	3.48691	Up	0.0398288	ENSMUST00000064948;ENSMUST00000114040;ENSMUST00000204053;ENSMUST00000114038	Dnah6	protein_coding	dynein, axonemal, heavy chain 6 [Source:MGI Symbol;Acc:MGI:107744]	ENSMUSP00000109674,ENSMUSP00000144791,ENSMUSP00000068758	gi|257467659|ref|NP_001158141.1|	dynein heavy chain 6, axonemal [Mus musculus]	sp|Q9C0G6|DYH6_HUMAN	Dynein heavy chain 6, axonemal OS=Homo sapiens GN=DNAH6 PE=2 SV=3	COG5245	843	Cytoskeleton ;	Dynein, heavy chain	mmu:330355	Dnah6, 9830168K20, A730004I20Rik, Dnahc6, mKIAA1697, mdhc6; dynein, axonemal, heavy chain 6; K10408 dynein heavy chain, axonemal	GO:0003341 cilium movement	GO:0016887 ATPase activity | GO:0005524 ATP binding | GO:0003777 microtubule motor activity	GO:0036156 inner dynein arm	PF08393.10 DHC_N2	IPR003593 AAA+ ATPase domain | IPR004273 Dynein heavy chain domain | IPR011704 ATPase, dynein-related, AAA domain | IPR013602 Dynein heavy chain, domain-2 | IPR024317 Dynein heavy chain, P-loop containing D4 domain | IPR024743 Dynein heavy chain, coiled coil stalk | IPR026980 Dynein heavy chain 6, axonemal | IPR026983 Dynein heavy chain | IPR027417 P-loop containing nucleoside triphosphate hydrol…
ENSMUSG00000044957	94	24	-1.91978	Down	0.0316519	ENSMUST00000056198	Pp2d1	protein_coding	protein phosphatase 2C-like domain containing 1 [Source:MGI Symbol;Acc:MGI:3612067]	ENSMUSP00000056682	gi|27734092|ref|NP_775625.1|	protein phosphatase 2C-like domain-containing protein 1 [Mus musculus] >gi|81875446|sp|Q8BVT6.1|PP2D1_MOUSE RecName: Full=Protein phosphatase 2C-like domain-containing protein 1	sp|Q8BVT6|PP2D1_MOUSE	Protein phosphatase 2C-like domain-containing protein 1 OS=Mus musculus GN=Pp2d1 PE=2 SV=1	COG0631	72.4	Signal transduction mechanisms ;	Serine/threonine protein phosphatase	cfa:476179	PHLPP1, PHLPP; PH domain and leucine rich repeat protein phosphatase 1; K16340 PH domain and leucine-rich repeat-containing protein phosphatase [EC:3.1.3.16]	GO:0006470 protein dephosphorylation	GO:0004722 protein serine/threonine phosphatase activity	--	PF00481.18 PP2C	IPR001932 PPM-type phosphatase domain | IPR015655 Protein phosphatase 2C family
ENSMUSG00000052305	1	681	9.2838	Up	1.45959e-27	ENSMUST00000023934;ENSMUST00000131960;ENSMUST00000153218	Hbb-bs	protein_coding	hemoglobin, beta adult s chain [Source:MGI Symbol;Acc:MGI:5474852]	ENSMUSP00000023934,ENSMUSP00000115607	gi|31982300|ref|NP_032246.2|	hemoglobin, beta adult t chain [Mus musculus] >gi|319402143|ref|NP_001188320.1| hemoglobin, beta adult s chain [Mus musculus] >gi|156257621|gb|ABU63178.1| beta-globin [Mus musculus] >gi|156257623|gb|ABU63179.1| beta-globin [Mus musculus] >gi|156257627|gb|ABU63181.1| beta-globin [Mus musculus] >gi|156257641|gb|ABU63188.1| beta-globin [Mus musculus] >gi|156257645|gb|ABU63190.1| beta-globin [Mus mus…	sp|P02088|HBB1_MOUSE	Hemoglobin subunit beta-1 OS=Mus musculus GN=Hbb-b1 PE=1 SV=2	--	--	--	--	mmu:100503605	Hbb-bs, Beta-s, Hbbt1, Hbbt2; hemoglobin, beta adult s chain; K13823 hemoglobin subunit beta	GO:0015671 oxygen transport | GO:0048821 erythrocyte development | GO:0010999 regulation of eIF2 alpha phosphorylation by heme	GO:0031722 hemoglobin beta binding | GO:0031721 hemoglobin alpha binding | GO:0020037 heme binding | GO:0004601 peroxidase activity | GO:0019825 oxygen binding | GO:0005506 iron ion binding | GO:0031720 haptoglobin binding | GO:0005344 oxygen transporter activity	GO:0072562 blood microparticle | GO:0031838 haptoglobin-hemoglobin complex | GO:0070062 extracellular exosome | GO:0005833 hemoglobin complex	PF00042.19 Globin	--
ENSMUSG00000069917	0	24	7.61472	Up	0.00180576	ENSMUST00000093207;ENSMUST00000147010	Hba-a2	protein_coding	hemoglobin alpha, adult chain 2 [Source:MGI Symbol;Acc:MGI:96016]	ENSMUSP00000090895	gi|145301549|ref|NP_001077424.1|	hemoglobin alpha, adult chain 2 [Mus musculus] >gi|145301578|ref|NP_032244.2| hemoglobin subunit alpha [Mus musculus] >gi|16973680|gb|AAL32371.1| alpha globin 1 [Mus musculus] >gi|16973681|gb|AAL32372.1| alpha globin 2 [Mus musculus] >gi|28175802|gb|AAH43020.1| Hemoglobin alpha, adult chain 1 [Mus musculus] >gi|156148253|gb|ABU54054.1| alpha-globin [Mus musculus]	sp|P01942|HBA_MOUSE	Hemoglobin subunit alpha OS=Mus musculus GN=Hba PE=1 SV=2	--	--	--	--	mmu:15122	Hba-a1, Hba, Hba1, Hbat1; hemoglobin alpha, adult chain 1; K13822 hemoglobin subunit alpha	GO:0048821 erythrocyte development | GO:0001701 in utero embryonic development	GO:0004601 peroxidase activity | GO:0019825 oxygen binding | GO:0031720 haptoglobin binding | GO:0020037 heme binding | GO:0043177 organic acid binding	GO:0070062 extracellular exosome | GO:0022627 cytosolic small ribosomal subunit | GO:0072562 blood microparticle | GO:0031838 haptoglobin-hemoglobin complex | GO:0016020 membrane | GO:0005833 hemoglobin complex	PF00042.19 Globin	IPR000971 Globin | IPR002338 Haemoglobin, alpha | IPR002339 Haemoglobin, pi | IPR009050 Globin-like | IPR012292 Globin/Protoglobin
ENSMUSG00000038690	1504	190	-2.9395	Down	9.27964e-08	ENSMUST00000161741;ENSMUST00000162360;ENSMUST00000037056;ENSMUST00000161845;ENSMUST00000200584	Atp5j2	protein_coding	ATP synthase, H+ transporting, mitochondrial F0 complex, subunit F2 [Source:MGI Symbol;Acc:MGI:1927558]	ENSMUSP00000125504,ENSMUSP00000138039,ENSMUSP00000039726,ENSMUSP00000123904	gi|10181184|ref|NP_065607.1|	ATP synthase subunit f, mitochondrial [Mus musculus] >gi|20141252|sp|P56135.3|ATPK_MOUSE RecName: Full=ATP synthase subunit f, mitochondrial >gi|20810556|gb|AAH29226.1| Atp5j2 protein [Mus musculus] >gi|148687043|gb|EDL18990.1| mCG17261, isoform CRA_a [Mus musculus]	sp|P56135|ATPK_MOUSE	ATP synthase subunit f, mitochondrial OS=Mus musculus GN=Atp5j2 PE=1 SV=3	--	--	--	--	mmu:57423	Atp5j2, 1110019H14Rik; ATP synthase, H+ transporting, mitochondrial F0 complex, subunit F2; K02130 F-type H+-transporting ATPase subunit f	GO:0006754 ATP biosynthetic process | GO:0015992 proton transport	GO:0016887 ATPase activity	GO:0016021 integral component of membrane | GO:0000276 mitochondrial proton-transporting ATP synthase complex, coupling factor F(o) | GO:0070062 extracellular exosome | GO:0005634 nucleus	PF10206.6 WRW	IPR019344 Mitochondrial F1-F0 ATP synthase subunit F, predicted
ENSMUSG00000069266	1944	469	-2.00667	Down	0.00120765	ENSMUST00000102965	H4c2	protein_coding	H4 clustered histone 2 [Source:MGI Symbol;Acc:MGI:2448420]	ENSMUSP00000100030	gi|1007715256|ref|XP_015799297.1|	PREDICTED: histone H4-like [Nothobranchius furzeri]	sp|Q28DR4|H4_XENTR	Histone H4 OS=Xenopus tropicalis GN=TGas006m08.1 PE=3 SV=1	COG2036	162	Chromatin structure and dynamics ;	Histones H3 and H4	cmk:103172236	histone H4; K11254 histone H4	GO:0000278 mitotic cell cycle | GO:0031047 gene silencing by RNA | GO:0045815 positive regulation of gene expression, epigenetic | GO:0000183 chromatin silencing at rDNA | GO:0000724 double-strand break repair via homologous recombination | GO:1904837 beta-catenin-TCF complex assembly | GO:0006303 double-strand break repair via nonhomologous end joining | GO:0051290 protein heterotetramerization …	GO:0035575 histone demethylase activity (H4-K20 specific) | GO:0042393 histone binding | GO:0044822 poly(A) RNA binding | GO:0046982 protein heterodimerization activity | GO:0019904 protein domain specific binding | GO:0003677 DNA binding	GO:0005654 nucleoplasm | GO:0016020 membrane | GO:0000784 nuclear chromosome, telomeric region | GO:0000786 nucleosome | GO:0070062 extracellular exosome	PF15511.3 CENP-T_C	IPR001951 Histone H4 | IPR004823 TATA box binding protein associated factor (TAF) | IPR009072 Histone-fold | IPR019809 Histone H4, conserved site
ENSMUSG00000061024	163	44	-1.84197	Down	0.0226798	ENSMUST00000072079	Rrs1	protein_coding	ribosome biogenesis regulator 1 [Source:MGI Symbol;Acc:MGI:1929721]	ENSMUSP00000071955	gi|227908779|ref|NP_067486.2|	ribosome biogenesis regulatory protein homolog [Mus musculus] >gi|21362904|sp|Q9CYH6.1|RRS1_MOUSE RecName: Full=Ribosome biogenesis regulatory protein homolog >gi|13097501|gb|AAH03481.1| RRS1 ribosome biogenesis regulator homolog (S. cerevisiae) [Mus musculus] >gi|33416756|gb|AAH55925.1| RRS1 ribosome biogenesis regulator homolog (S. cerevisiae) [Mus musculus] >gi|148682331|gb|EDL14278.1| RRS1 ri…	sp|Q9CYH6|RRS1_MOUSE	Ribosome biogenesis regulatory protein homolog OS=Mus musculus GN=Rrs1 PE=1 SV=1	COG5225	130	Translation, ribosomal structure and biogenesis ;	Uncharacterized protein involved in ribosome biogenesis	mmu:59014	Rrs1, 5730466A07Rik, AA415037, D1Ertd701e, Rrr; ribosome biogenesis regulator 1; K14852 regulator of ribosome biosynthesis	GO:0007080 mitotic metaphase plate congression | GO:0042273 ribosomal large subunit biogenesis | GO:0002244 hematopoietic progenitor cell differentiation | GO:0000447 endonucleolytic cleavage in ITS1 to separate SSU-rRNA from 5.8S rRNA and LSU-rRNA from tricistronic rRNA transcript (SSU-rRNA, 5.8S rRNA, LSU-rRNA) | GO:0000055 ribosomal large subunit export from nucleus	GO:0044822 poly(A) RNA binding | GO:0005515 protein binding	GO:0005730 nucleolus | GO:0000794 condensed nuclear chromosome | GO:0030687 preribosome, large subunit precursor | GO:0005783 endoplasmic reticulum	PF04939.9 RRS1	IPR007023 Ribosomal biogenesis regulatory protein
ENSMUSG00000007888	351	1150	1.75614	Up	0.00909669	ENSMUST00000008032;ENSMUST00000132648;ENSMUST00000127983	Crlf1	protein_coding	cytokine receptor-like factor 1 [Source:MGI Symbol;Acc:MGI:1340030]	ENSMUSP00000008032,ENSMUSP00000119545,ENSMUSP00000115614	gi|9055196|ref|NP_061297.1|	cytokine receptor-like factor 1 precursor [Mus musculus] >gi|44887815|sp|Q9JM58.1|CRLF1_MOUSE RecName: Full=Cytokine receptor-like factor 1; AltName: Full=Cytokine receptor-like molecule 3; Short=CRLM-3; AltName: Full=Cytokine-like factor 1; Short=CLF-1; AltName: Full=Novel cytokine receptor 6; Short=NR6; Flags: Precursor >gi|7259324|dbj|BAA92777.1| cytokine receptor like molecule 3 [Mus musculus…	sp|Q9JM58|CRLF1_MOUSE	Cytokine receptor-like factor 1 OS=Mus musculus GN=Crlf1 PE=1 SV=1	--	--	--	--	cmk:103177817	interleukin-6 receptor subunit beta-like; K05060 interleukin 6 signal transducer	GO:0042517 positive regulation of tyrosine phosphorylation of Stat3 protein | GO:2000672 negative regulation of motor neuron apoptotic process | GO:0001657 ureteric bud development | GO:0008284 positive regulation of cell proliferation	GO:0005127 ciliary neurotrophic factor receptor binding | GO:0019955 cytokine binding | GO:0005125 cytokine activity | GO:0046982 protein heterodimerization activity	GO:0097058 CRLF-CLCF1 complex	PF09067.7 EpoR_lig-bind	IPR003961 Fibronectin type III | IPR007110 Immunoglobulin-like domain | IPR013783 Immunoglobulin-like fold | IPR015152 Growth hormone/erythropoietin receptor, ligand binding
ENSMUSG00000079523	1579	443	-1.78893	Down	0.00673788	ENSMUST00000114050;ENSMUST00000114049;ENSMUST00000114048;ENSMUST00000144337	Tmsb10	protein_coding	thymosin, beta 10 [Source:MGI Symbol;Acc:MGI:109146]	ENSMUSP00000109684,ENSMUSP00000109683,ENSMUSP00000109682,ENSMUSP00000145075	gi|852810692|ref|XP_012893120.1|	PREDICTED: zyxin-like, partial [Dipodomys ordii]	sp|P63313|TYB10_HUMAN	Thymosin beta-10 OS=Homo sapiens GN=TMSB10 PE=1 SV=2	--	--	--	--	bacu:103010753	TMSB10; thymosin beta 10; K13785 thymosin beta 10	GO:0007015 actin filament organization	GO:0003785 actin monomer binding	GO:0005856 cytoskeleton | GO:0005737 cytoplasm	PF01290.17 Thymosin	IPR001152 Beta-thymosin
ENSMUSG00000066878	5	116	4.54583	Up	1.4858e-08	ENSMUST00000086423	Gm10184	protein_coding	predicted pseudogene 10184 [Source:MGI Symbol;Acc:MGI:3704480]	ENSMUSP00000137310	gi|350610758|pdb|3TPO|A	Chain A, Crystal Structure Of D192a/e396a Mutant Of Mouse Importin Alpha2	sp|P52293|IMA1_MOUSE	Importin subunit alpha-1 OS=Mus musculus GN=Kpna2 PE=1 SV=2	COG5064	475	Intracellular trafficking, secretion, and vesicular transport ;	Karyopherin (importin) alpha	mmu:16647	Kpna2, 2410044B12Rik, IPOA1, PTAC58, Rch1; karyopherin (importin) alpha 2; K15043 importin subunit alpha-2	GO:0006607 NLS-bearing protein import into nucleus	GO:0008565 protein transporter activity | GO:0008139 nuclear localization sequence binding | GO:0044822 poly(A) RNA binding | GO:0042826 histone deacetylase binding	GO:0005829 cytosol | GO:0005643 nuclear pore | GO:0005654 nucleoplasm | GO:0016020 membrane	PF01749.17 IBB	IPR000225 Armadillo | IPR002652 Importin-alpha, importin-beta-binding domain | IPR011989 Armadillo-like helical | IPR016024 Armadillo-type fold | IPR024931 Importin subunit alpha | IPR032413 Atypical Arm repeat
ENSMUSG00000007721	258	57	-2.13152	Down	0.00202977	ENSMUST00000007865;ENSMUST00000212680	Ccdc124	protein_coding	coiled-coil domain containing 124 [Source:MGI Symbol;Acc:MGI:1916403]	ENSMUSP00000007865,ENSMUSP00000148322	gi|47059143|ref|NP_081240.1|	coiled-coil domain-containing protein 124 [Mus musculus] >gi|81905701|sp|Q9D8X2.1|CC124_MOUSE RecName: Full=Coiled-coil domain-containing protein 124 >gi|29612507|gb|AAH49678.1| Coiled-coil domain containing 124 [Mus musculus] >gi|30047280|gb|AAH50938.1| Coiled-coil domain containing 124 [Mus musculus] >gi|148696935|gb|EDL28882.1| RIKEN cDNA 1810023B24, isoform CRA_a [Mus musculus] >gi|148696936|…	sp|Q9D8X2|CC124_MOUSE	Coiled-coil domain-containing protein 124 OS=Mus musculus GN=Ccdc124 PE=1 SV=1	--	--	--	--	--	--	GO:0007049 cell cycle | GO:0051301 cell division	GO:0044822 poly(A) RNA binding	GO:0005856 cytoskeleton | GO:0005737 cytoplasm | GO:0005886 plasma membrane	PF06244.9 DUF1014	IPR009071 High mobility group box domain | IPR010422 Coiled-coil domain-containing protein 124
ENSMUSG00000026639	56	207	1.92814	Up	0.00909669	ENSMUST00000194407;ENSMUST00000194677;ENSMUST00000192322;ENSMUST00000162977;ENSMUST00000193128;ENSMUST00000016315;ENSMUST00000162180;ENSMUST00000159955;ENSMUST00000161526	Lamb3	protein_coding	laminin, beta 3 [Source:MGI Symbol;Acc:MGI:99915]	ENSMUSP00000142053,ENSMUSP00000141302,ENSMUSP00000016315,ENSMUSP00000123875	gi|113865981|ref|NP_032510.2|	laminin subunit beta-3 precursor [Mus musculus] >gi|485050325|ref|NP_001264857.1| laminin subunit beta-3 precursor [Mus musculus] >gi|341940891|sp|Q61087.2|LAMB3_MOUSE RecName: Full=Laminin subunit beta-3; AltName: Full=Epiligrin subunit bata; AltName: Full=Kalinin B1 chain; AltName: Full=Kalinin subunit beta; AltName: Full=Laminin-5 subunit beta; AltName: Full=Nicein subunit beta; Flags: Precurs…	sp|Q61087|LAMB3_MOUSE	Laminin subunit beta-3 OS=Mus musculus GN=Lamb3 PE=1 SV=2	--	--	--	--	mmu:16780	Lamb3; laminin, beta 3; K06244 laminin, beta 3	GO:0007155 cell adhesion | GO:0035987 endodermal cell differentiation | GO:0050873 brown fat cell differentiation	GO:0032403 protein complex binding	GO:0005610 laminin-5 complex	PF00055.14 Laminin_N	IPR000742 EGF-like domain | IPR002049 Laminin EGF domain | IPR008211 Laminin, N-terminal
ENSMUSG00000095730	26	1	-4.49559	Down	0.00542559	ENSMUST00000170922;ENSMUST00000211433;ENSMUST00000209613	Vmn2r29	protein_coding	vomeronasal 2, receptor 29 [Source:MGI Symbol;Acc:MGI:1923479]	ENSMUSP00000131990,ENSMUSP00000147896	gi|164698709|ref|NP_001106939.1|	vomeronasal 2, receptor 29 precursor [Mus musculus]	sp|E9Q6I0|V2116_MOUSE	Vomeronasal type-2 receptor 116 OS=Mus musculus GN=Vmn2r116 PE=1 SV=1	--	--	--	--	mmu:76229	Vmn2r29, 6430701C03Rik; vomeronasal 2, receptor 29; K04613 vomeronasal 2 receptor	--	--	--	PF01094.25 ANF_receptor	IPR000337 GPCR, family 3 | IPR001828 Receptor, ligand binding region | IPR004073 GPCR, family 3, vomeronasal receptor, type 2 | IPR011500 GPCR, family 3, nine cysteines domain | IPR017978 GPCR family 3, C-terminal | IPR028082 Periplasmic binding protein-like I
ENSMUSG00000025743	246	833	1.80354	Up	0.00718848	ENSMUST00000070478;ENSMUST00000146093;ENSMUST00000152591;ENSMUST00000141297;ENSMUST00000140623	Sdc3	protein_coding	syndecan 3 [Source:MGI Symbol;Acc:MGI:1349163]	ENSMUSP00000065877,ENSMUSP00000118685,ENSMUSP00000123608	gi|37359970|dbj|BAC97963.1|	mKIAA0468 protein [Mus musculus]	sp|Q64519|SDC3_MOUSE	Syndecan-3 OS=Mus musculus GN=Sdc3 PE=1 SV=2	--	--	--	--	mmu:20970	Sdc3, Synd3, mKIAA0468, syn-3; syndecan 3; K16337 syndecan 3	GO:0030334 regulation of cell migration | GO:0007155 cell adhesion	GO:0005515 protein binding	GO:0009986 cell surface | GO:0043234 protein complex | GO:0030424 axon | GO:0016021 integral component of membrane	PF01034.17 Syndecan	--
ENSMUSG00000034910	24	1	-4.3807	Down	0.00923342	ENSMUST00000038489	Pygo1	protein_coding	pygopus 1 [Source:MGI Symbol;Acc:MGI:1919385]	ENSMUSP00000044368	gi|99028874|ref|NP_082392.1|	pygopus homolog 1 [Mus musculus] >gi|23396826|sp|Q9D0P5.1|PYGO1_MOUSE RecName: Full=Pygopus homolog 1 >gi|94963123|gb|AAI16631.1| Pygopus 1 [Mus musculus] >gi|94963125|gb|AAI16632.1| Pygopus 1 [Mus musculus] >gi|148694324|gb|EDL26271.1| mCG8029 [Mus musculus]	sp|Q9D0P5|PYGO1_MOUSE	Pygopus homolog 1 OS=Mus musculus GN=Pygo1 PE=1 SV=1	--	--	--	--	fpg:101919976	SHC1; SHC adaptor protein 1; K06279 SHC-transforming protein 1	GO:0016055 Wnt signaling pathway | GO:0001822 kidney development | GO:0034504 protein localization to nucleus | GO:0007289 spermatid nucleus differentiation | GO:0009791 post-embryonic development | GO:0045944 positive regulation of transcription from RNA polymerase II promoter | GO:0002244 hematopoietic progenitor cell differentiation	GO:0005515 protein binding | GO:0008270 zinc ion binding	GO:0005634 nucleus	PF00628.26 PHD	IPR001965 Zinc finger, PHD-type | IPR011011 Zinc finger, FYVE/PHD-type | IPR013083 Zinc finger, RING/FYVE/PHD-type | IPR019786 Zinc finger, PHD-type, conserved site | IPR019787 Zinc finger, PHD-finger
ENSMUSG00000070425	28	0	-7.79184	Down	0.000470091	ENSMUST00000123372;ENSMUST00000084843;ENSMUST00000155078;ENSMUST00000139104	Xntrpc	protein_coding	Xndc1-transient receptor potential cation channel, subfamily C, member 2 readthrough [Source:MGI Symbol;Acc:MGI:5546370]	ENSMUSP00000121068,ENSMUSP00000081903,ENSMUSP00000123466,ENSMUSP00000122430	gi|154090945|ref|NP_035774.2|	Xndr-Trpc2 readthrough [Mus musculus]	sp|Q9R244|TRPC2_MOUSE	Short transient receptor potential channel 2 OS=Mus musculus GN=Trpc2 PE=2 SV=2	--	--	--	--	mmu:102443351	Xntrpc, Xndr-trpc2; Xndc1-transient receptor potential cation channel, subfamily C, member 2 readthrough; K04965 transient receptor potential cation channel subfamily C member 2	--	--	--	PF01834.13 XRCC1_N	IPR002153 Transient receptor potential channel, canonical | IPR002706 DNA-repair protein Xrcc1, N-terminal | IPR005458 Transient receptor potential channel, canonical 2 | IPR005821 Ion transport domain | IPR008979 Galactose-binding domain-like | IPR013555 Transient receptor ion channel domain | IPR020683 Ankyrin repeat-containing domain
ENSMUSG00000089945	84	14	-2.5301	Down	0.00266418	ENSMUST00000098066;ENSMUST00000126465;ENSMUST00000150412	Pakap	protein_coding	paralemmin A kinase anchor protein [Source:MGI Symbol;Acc:MGI:5141924]	ENSMUSP00000095674,ENSMUSP00000130230,ENSMUSP00000117466	gi|752507732|ref|NP_001291473.1|	paralemmin A kinase anchor protein [Mus musculus]	sp|O54931|AKAP2_MOUSE	A-kinase anchor protein 2 OS=Mus musculus GN=Akap2 PE=1 SV=3	--	--	--	--	mmu:677884	Pakap, AF064781, Gm20459, Palm2-Akap2, Palm2Akap2; paralemmin A kinase anchor protein; K16519 A-kinase anchor protein 2	GO:0008104 protein localization | GO:0051291 protein heterooligomerization | GO:0007015 actin filament organization | GO:0007178 transmembrane receptor protein serine/threonine kinase signaling pathway	GO:0051018 protein kinase A binding | GO:0019904 protein domain specific binding	GO:0043234 protein complex	PF03285.12 Paralemmin	IPR004965 Paralemmin | IPR029304 A-kinase anchor protein 2, C-terminal domain
ENSMUSG00000051989	137	29	-2.19086	Down	0.00524121	ENSMUST00000063641;ENSMUST00000118064	Smim11	protein_coding	small integral membrane protein 11 [Source:MGI Symbol;Acc:MGI:1916186]	ENSMUSP00000070724,ENSMUSP00000113086	gi|20270271|ref|NP_620082.1|	small integral membrane protein 11A [Mus musculus] >gi|20137432|sp|Q99J19.1|SI11A_MOUSE RecName: Full=Small integral membrane protein 11A; AltName: Full=Small integral membrane protein 11 >gi|13542959|gb|AAH05668.1| RIKEN cDNA 1190017O12 gene [Mus musculus] >gi|17061774|gb|AAK68719.1| C21ORF51 [Mus musculus] >gi|148671842|gb|EDL03789.1| RIKEN cDNA 1190017O12 [Mus musculus]	sp|Q99J19|SI11A_MOUSE	Small integral membrane protein 11A OS=Mus musculus GN=Smim11a PE=1 SV=1	--	--	--	--	ccw:104698094	ribonucleoside-diphosphate reductase large subunit; K10807 ribonucleoside-diphosphate reductase subunit M1 [EC:1.17.4.1]	--	--	GO:0016021 integral component of membrane	PF14981.3 FAM165	IPR028023 Small integral membrane protein 11
ENSMUSG00000020099	1463	4688	1.72437	Up	0.00909669	ENSMUST00000077925;ENSMUST00000218316;ENSMUST00000218637	Unc5b	protein_coding	unc-5 netrin receptor B [Source:MGI Symbol;Acc:MGI:894703]	ENSMUSP00000077080,ENSMUSP00000151251	gi|85861262|ref|NP_084046.2|	netrin receptor UNC5B precursor [Mus musculus] >gi|54036592|sp|Q8K1S3.1|UNC5B_MOUSE RecName: Full=Netrin receptor UNC5B; AltName: Full=Protein unc-5 homolog 2; AltName: Full=Protein unc-5 homolog B; Flags: Precursor >gi|22080674|emb|CAD32251.1| netrin receptor Unc5h2 [Mus musculus] >gi|148700217|gb|EDL32164.1| unc-5 homolog B (C. elegans), isoform CRA_b [Mus musculus]	sp|Q8K1S3|UNC5B_MOUSE	Netrin receptor UNC5B OS=Mus musculus GN=Unc5b PE=1 SV=1	--	--	--	--	mmu:107449	Unc5b, 6330415E02Rik, A630020F16, D10Bwg0792e, Unc5h2; unc-5 netrin receptor B; K07521 netrin receptor unc-5	GO:0033564 anterior/posterior axon guidance | GO:0001525 angiogenesis | GO:2001241 positive regulation of extrinsic apoptotic signaling pathway in absence of ligand | GO:0014068 positive regulation of phosphatidylinositol 3-kinase signaling | GO:2001240 negative regulation of extrinsic apoptotic signaling pathway in absence of ligand | GO:0043524 negative regulation of neuron apoptotic process | …	GO:0005042 netrin receptor activity | GO:0005515 protein binding	GO:0016021 integral component of membrane | GO:0045121 membrane raft | GO:0005886 plasma membrane	PF07679.13 I-set	IPR000488 Death domain | IPR000884 Thrombospondin type-1 (TSP1) repeat | IPR000906 ZU5 domain | IPR003598 Immunoglobulin subtype 2 | IPR003599 Immunoglobulin subtype | IPR007110 Immunoglobulin-like domain | IPR011029 Death-like domain | IPR013098 Immunoglobulin I-set | IPR013783 Immunoglobulin-like fold
ENSMUSG00000068240	3866	789	-2.24815	Down	0.000105508	ENSMUST00000089430	Gm11808	protein_coding	predicted gene 11808 [Source:MGI Symbol;Acc:MGI:3649356]	ENSMUSP00000086852	gi|1011602420|gb|KYO40344.1|	kxDL motif-containing protein 1 [Alligator mississippiensis]	sp|P62987|RL40_HUMAN	Ubiquitin-60S ribosomal protein L40 OS=Homo sapiens GN=UBA52 PE=1 SV=2	COG5272	154	Posttranslational modification, protein turnover, chaperones ;	Ubiquitin	xtr:448705	uba52, cep52, hubcep52, rpl40; ubiquitin A-52 residue ribosomal protein fusion product 1; K02927 large subunit ribosomal protein L40e	GO:0034162 toll-like receptor 9 signaling pathway | GO:0038095 Fc-epsilon receptor signaling pathway | GO:0045742 positive regulation of epidermal growth factor receptor signaling pathway | GO:0070987 error-free translesion synthesis | GO:0000715 nucleotide-excision repair, DNA damage recognition | GO:0000186 activation of MAPKK activity | GO:0042059 negative regulation of epidermal growth factor…	GO:0003735 structural constituent of ribosome | GO:0005515 protein binding	GO:0030666 endocytic vesicle membrane | GO:0043209 myelin sheath | GO:0005765 lysosomal membrane | GO:0005886 plasma membrane | GO:0070062 extracellular exosome | GO:0005654 nucleoplasm | GO:0010008 endosome membrane | GO:0005615 extracellular space | GO:0022625 cytosolic large ribosomal subunit	PF00240.20 ubiquitin	IPR000626 Ubiquitin domain | IPR001975 Ribosomal protein L40e | IPR019954 Ubiquitin conserved site | IPR019956 Ubiquitin | IPR029071 Ubiquitin-related domain
ENSMUSG00000090272	46	254	2.50626	Up	0.000104204	ENSMUST00000220623;ENSMUST00000186442;ENSMUST00000188804;ENSMUST00000189474;ENSMUST00000190071;ENSMUST00000190651;ENSMUST00000189501;ENSMUST00000191500;ENSMUST00000187636	Mndal	protein_coding	myeloid nuclear differentiation antigen like [Source:MGI Symbol;Acc:MGI:3780953]	ENSMUSP00000140539,ENSMUSP00000140610,ENSMUSP00000141055,ENSMUSP00000140191	gi|283046753|ref|NP_001164324.1|	myeloid cell nuclear differentiation antigen-like protein [Mus musculus] >gi|290463273|sp|D0QMC3.1|MNDAL_MOUSE RecName: Full=Myeloid cell nuclear differentiation antigen-like protein >gi|254847431|gb|ACT83572.1| Mndal [Mus musculus]	sp|D0QMC3|MNDAL_MOUSE	Myeloid cell nuclear differentiation antigen-like protein OS=Mus musculus GN=Mndal PE=1 SV=1	--	--	--	--	mmu:15951	Ifi204, Ifi16, p204; interferon activated gene 204; K20914 gamma-interferon-inducible protein 16	GO:0030308 negative regulation of cell growth	GO:0000978 RNA polymerase II core promoter proximal region sequence-specific DNA binding | GO:0042802 identical protein binding | GO:0001078 transcriptional repressor activity, RNA polymerase II core promoter proximal region sequence-specific binding | GO:0008134 transcription factor binding | GO:0001047 core promoter binding | GO:0044822 poly(A) RNA binding	GO:0005737 cytoplasm | GO:0005730 nucleolus | GO:0016020 membrane	PF02758.13 PYRIN	--
ENSMUSG00000071478	744	127	-2.50491	Down	1.94488e-05	ENSMUST00000090776	H2ac7	protein_coding	H2A clustered histone 7 [Source:MGI Symbol;Acc:MGI:2448289]	ENSMUSP00000088281	gi|655839886|ref|XP_002714260.2|	PREDICTED: histone H2A type 1-like [Oryctolagus cuniculus]	sp|P04908|H2A1B_HUMAN	Histone H2A type 1-B/E OS=Homo sapiens GN=HIST1H2AB PE=1 SV=2	COG5262	197	Chromatin structure and dynamics ;	Histone H2A	cfr:106729279	histone H2A type 1; K11251 histone H2A	GO:0008285 negative regulation of cell proliferation | GO:0006342 chromatin silencing	GO:0019899 enzyme binding | GO:0003677 DNA binding | GO:0046982 protein heterodimerization activity	GO:0000786 nucleosome | GO:0000790 nuclear chromatin | GO:0070062 extracellular exosome	PF00125.21 Histone	IPR002119 Histone H2A | IPR007125 Histone H2A/H2B/H3 | IPR009072 Histone-fold | IPR032454 Histone H2A, C-terminal domain | IPR032458 Histone H2A conserved site
ENSMUSG00000026414	6	39	2.7192	Up	0.020594	ENSMUST00000188028;ENSMUST00000178204;ENSMUST00000191055;ENSMUST00000186225;ENSMUST00000190451;ENSMUST00000189732;ENSMUST00000189355;ENSMUST00000189826;ENSMUST00000112087;ENSMUST00000178854;ENSMUST00000027671;ENSMUST00000179863;ENSMUST00000112085;ENSMUST00000112086;ENSMUST00000188098	Tnnt2	protein_coding	troponin T2, cardiac [Source:MGI Symbol;Acc:MGI:104597]	ENSMUSP00000140941,ENSMUSP00000140282,ENSMUSP00000139669,ENSMUSP00000139919,ENSMUSP00000140807,ENSMUSP00000107717,ENSMUSP00000136265,ENSMUSP00000027671,ENSMUSP00000137093,ENSMUSP00000107715,ENSMUSP00000137579,ENSMUSP00000107716	gi|148707618|gb|EDL39565.1|	troponin T2, cardiac, isoform CRA_c, partial [Mus musculus]	sp|P50752|TNNT2_MOUSE	Troponin T, cardiac muscle OS=Mus musculus GN=Tnnt2 PE=1 SV=2	--	--	--	--	cge:100756913	Tnnt2; troponin T2, cardiac type; K12045 troponin T, cardiac muscle	GO:0051291 protein heterooligomerization | GO:0008016 regulation of heart contraction | GO:0055010 ventricular cardiac muscle tissue morphogenesis | GO:0060048 cardiac muscle contraction | GO:0055009 atrial cardiac muscle tissue morphogenesis | GO:0051592 response to calcium ion | GO:0045214 sarcomere organization | GO:0032972 regulation of muscle filament sliding speed | GO:0051764 actin crossli…	GO:0030674 protein binding, bridging | GO:0003779 actin binding | GO:0005523 tropomyosin binding | GO:0031013 troponin I binding | GO:0030172 troponin C binding | GO:0016887 ATPase activity | GO:0005200 structural constituent of cytoskeleton	GO:0005861 troponin complex	PF00992.17 Troponin	IPR001978 Troponin | IPR027707 Troponin T
ENSMUSG00000020649	4513	14557	1.73394	Up	0.00844279	ENSMUST00000020980;ENSMUST00000147789;ENSMUST00000153058;ENSMUST00000154588	Rrm2	protein_coding	ribonucleotide reductase M2 [Source:MGI Symbol;Acc:MGI:98181]	ENSMUSP00000020980,ENSMUSP00000120893,ENSMUSP00000119502	gi|148705043|gb|EDL36990.1|	ribonucleotide reductase M2, partial [Mus musculus]	sp|P11157|RIR2_MOUSE	Ribonucleoside-diphosphate reductase subunit M2 OS=Mus musculus GN=Rrm2 PE=1 SV=1	COG0208	474	Nucleotide transport and metabolism ;	Ribonucleotide reductase, beta subunit	mmu:20135	Rrm2, AA407299, R2; ribonucleotide reductase M2; K10808 ribonucleoside-diphosphate reductase subunit M2 [EC:1.17.4.1]	GO:0000278 mitotic cell cycle | GO:0055114 oxidation-reduction process | GO:0009263 deoxyribonucleotide biosynthetic process | GO:0006260 DNA replication | GO:0006206 pyrimidine nucleobase metabolic process | GO:0009186 deoxyribonucleoside diphosphate metabolic process | GO:0051290 protein heterotetramerization | GO:0008284 positive regulation of cell proliferation	GO:0046872 metal ion binding | GO:0005515 protein binding | GO:0004748 ribonucleoside-diphosphate reductase activity, thioredoxin disulfide as acceptor	GO:0005971 ribonucleoside-diphosphate reductase complex | GO:0005635 nuclear envelope	PF00268.18 Ribonuc_red_sm	IPR000358 Ribonucleotide reductase small subunit | IPR009078 Ferritin-like superfamily | IPR012348 Ribonucleotide reductase-related | IPR030475 Ribonucleotide reductase small subunit, acitve site
ENSMUSG00000042541	2408	815	-1.51841	Down	0.0391295	ENSMUST00000041111;ENSMUST00000205180	Sem1	protein_coding	SEM1, 26S proteasome complex subunit [Source:MGI Symbol;Acc:MGI:109238]	ENSMUSP00000040741	gi|926689671|ref|XP_005679008.2|	PREDICTED: 26S proteasome complex subunit DSS1 [Capra hircus]	sp|Q3ZBR6|DSS1_BOVIN	26S proteasome complex subunit DSS1 OS=Bos taurus GN=SHFM1 PE=3 SV=1	--	--	--	--	amj:102572577	SHFM1; split hand/foot malformation (ectrodactyly) type 1; K10881 26 proteasome complex subunit DSS1	GO:0043248 proteasome assembly | GO:0000724 double-strand break repair via homologous recombination | GO:0006508 proteolysis | GO:0006406 mRNA export from nucleus	GO:0005515 protein binding	GO:0032039 integrator complex | GO:0008541 proteasome regulatory particle, lid subcomplex	PF05160.10 DSS1_SEM1	IPR007834 DSS1/SEM1
ENSMUSG00000083012	285	68	-2.02097	Down	0.00369675	ENSMUST00000200267;ENSMUST00000196487;ENSMUST00000198982;ENSMUST00000198994	Fam220a	protein_coding	family with sequence similarity 220, member A [Source:MGI Symbol;Acc:MGI:1914488]	ENSMUSP00000142548,ENSMUSP00000143202	gi|165905597|ref|NP_080326.2|	protein FAM220A [Mus musculus] >gi|165905599|ref|NP_598464.3| protein FAM220A [Mus musculus] >gi|123797569|sp|Q3ZN08.1|F220A_MOUSE RecName: Full=Protein FAM220A; AltName: Full=Acrosomal protein ACPIN1; AltName: Full=STAT3-interacting protein as a repressor >gi|56805433|gb|AAW31134.1| STAT3-interacting protein as a repressor [Mus musculus] >gi|187955210|gb|AAI47187.1| RIKEN cDNA 2810453I06 gene [M…	sp|Q3ZN08|F220A_MOUSE	Protein FAM220A OS=Mus musculus GN=Fam220a PE=1 SV=1	--	--	--	--	--	--	--	--	GO:0005634 nucleus	PF15487.3 FAM220	IPR029155 SIPAR domain
ENSMUSG00000054293	351	1008	1.56602	Up	0.03355	ENSMUST00000147521;ENSMUST00000167673;ENSMUST00000125676;ENSMUST00000180182;ENSMUST00000137107;ENSMUST00000067249	P2ry10b	protein_coding	purinergic receptor P2Y, G-protein coupled 10B [Source:MGI Symbol;Acc:MGI:2441814]	ENSMUSP00000065588,ENSMUSP00000118187,ENSMUSP00000122347,ENSMUSP00000122348,ENSMUSP00000133122,ENSMUSP00000136348	gi|30425170|ref|NP_780651.1|	purinergic receptor P2Y G-protein coupled 10-like [Mus musculus] >gi|169790761|ref|NP_001116067.1| purinergic receptor P2Y G-protein coupled 10-like [Mus musculus] >gi|169790763|ref|NP_001116068.1| purinergic receptor P2Y G-protein coupled 10-like [Mus musculus] >gi|148682093|gb|EDL14040.1| RIKEN cDNA A630033H20, isoform CRA_a [Mus musculus]	sp|Q8BFU7|P2Y10_MOUSE	Putative P2Y purinoceptor 10 OS=Mus musculus GN=P2ry10 PE=2 SV=1	--	--	--	--	mmu:213438	A630033H20Rik, AI662791, P2ry10; RIKEN cDNA A630033H20 gene; K04274 purinergic receptor P2Y, G protein-coupled, 10	GO:0007186 G-protein coupled receptor signaling pathway	GO:0004930 G-protein coupled receptor activity	GO:0016021 integral component of membrane	PF00001.18 7tm_1	IPR000276 G protein-coupled receptor, rhodopsin-like | IPR017452 GPCR, rhodopsin-like, 7TM
